# Supplementary material for: Divergent synthesis of pyrrolidine and glutamic acid derivatives using a macrocyclic phase-transfer catalyst under high-pressure conditions
Source: Royal Society of Chemistry journal article supplement (doi:10.1039/d1qo01198g), 2021-01-01
Supplement: d1qo01198g1.pdf [file d1qo01198g1.pdf]

# Divergent synthesis of pyrrolidine and glutamic acid derivatives using macrocyclic phase-transfer catalyst under high-pressure conditions

Agata Tyszka-Gumkowska and Janusz Jurczak\*

Institute of Organic Chemistry, Polish Academy of Sciences, Kasprzaka 44/52, 01-224 Warsaw, Poland; e-mail: [jurczak\\_group@icho.edu.pl](mailto:jurczak_group@icho.edu.pl)

## TABLE OF CONTENT

|      |                                                               |     |
|------|---------------------------------------------------------------|-----|
| 1.   | Crystallographic data.....                                    | S2  |
| 2.   | Optimization of the reaction conditions.....                  | S3  |
| 3.   | Synthetic procedures and structural analysis.....             | S8  |
| 3.1. | General remarks.....                                          | S8  |
| 3.2. | Synthetic procedures.....                                     | S8  |
| 3.3. | Substance analysis.....                                       | S10 |
| 4.   | Copies of <sup>1</sup> H and <sup>13</sup> C NMR spectra..... | S29 |
| 5.   | Copies of HPLC chromatograms.....                             | S73 |
| 6.   | References.....                                               | S95 |

## 1. Crystallographic data

The monocrystals were obtained by slowly evaporating a saturated solution of **4.2** in hexane. Single crystal X-ray diffraction measurements were carried out on a Agilent Supernova diffractometer, at 100K with graphite monochromated Cu K $\alpha$  radiation (1.54184 Å). The data reduction was made by using CrysAlisPRO1 software.<sup>1</sup> The structures were solved by direct methods and refined on F<sup>2</sup> by full-matrix least-squares by using SHELXS97 and SHELXL97.<sup>2</sup> All non-hydrogen atoms were refined as anisotropic while hydrogen atoms were placed in calculated positions, and refined in riding mode.

| Table S1: Crystallographic data for monocrystal of compound <b>4.2</b> |                                                                                    |
|------------------------------------------------------------------------|------------------------------------------------------------------------------------|
| compound                                                               | <b>4.2</b>                                                                         |
| structure                                                              | 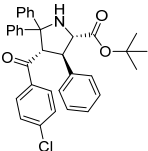 |
| Empirical formula                                                      | C <sub>34</sub> H <sub>32</sub> Cl N O <sub>3</sub>                                |
| Moiety formula                                                         | C <sub>34</sub> H <sub>32</sub> Cl N O <sub>3</sub>                                |
| Formula weight                                                         | 538.09                                                                             |
| CCDC No.                                                               | 2038651                                                                            |
| Temperature                                                            | 100 K                                                                              |
| Wavelength                                                             | 1.54184 Å (Cu K $\alpha$ )                                                         |
| Crystal system                                                         | triclinic                                                                          |
| Space group                                                            | <i>P</i> -1                                                                        |
| Unit cell dimensions                                                   | $a=9.9043(6)$ $\alpha=73.272(4)$                                                   |
|                                                                        | $b=11.6621(6)$ $\beta=77.100(4)$                                                   |
|                                                                        | $c=14.0011(6)$ $\gamma=68.468(5)$                                                  |
| Volume                                                                 | 1428.06(14) Å <sup>3</sup>                                                         |
| <i>Z</i>                                                               | 2                                                                                  |
| Density Calc.                                                          | 1.390 g/cm <sup>3</sup>                                                            |
| Absorption coefficient                                                 | 1.457                                                                              |
| F(000)                                                                 | 570.3560                                                                           |
| Crystal                                                                | colourless block                                                                   |
| angular range $\Theta$                                                 | 4.2 – 70.0                                                                         |
| Index ranges                                                           | H min, max -11, 11<br>K min, max -14, 13.<br>L min, max -16, 11                    |
| Reflections collected<br>(all / independent)                           | 5322/4857                                                                          |
| Refinement method                                                      | Full-matrix least-squares on $F^2$                                                 |
| Absorption correction                                                  | multi-scan                                                                         |
| Restraints / nodes / parameters                                        | 4857 / 0 / 359                                                                     |
| Goodness-of-fit on $F^2$                                               | 1.0528                                                                             |
| Final R indices [ $F^2 > 2\sigma(F^2)$ ]                               | $R_1=0.0343$ $wR_2=0.0909$                                                         |
| R indices (all data)                                                   | $R_1=0.0373$ $wR_2=0.09036$                                                        |
| $\rho_{\max}$ $\rho_{\min}$                                            | 0.2466 and -0.377                                                                  |

## 2. Optimization of the reaction conditions

**Table S2:** Investigation of optimal reaction conditions at 10 kbar pressure and 2.5 mL of MTBE as a solvent

|                                 |                      | Michael addition product |                        |                     | 1,3-dipolar cycloaddition product     |                                                |
|---------------------------------|----------------------|--------------------------|------------------------|---------------------|---------------------------------------|------------------------------------------------|
| Base (5 equiv.)                 | Without catalyst     | <br>5 mol%               | Without catalyst 50 °C | <br>5 mol% in 50 °C | <br>5 mol% + 50 mol% NEt <sub>3</sub> | <br>5 mol% + 50 mol% NEt <sub>3</sub> in 50 °C |
| CsOH·H <sub>2</sub> O           | W=82%<br>d.r. 91:9   | W=96%<br>d.r. 96:4       | W=90%<br>d.r. 57:43    | W=98%<br>d.r. 92:8  | W=81%<br>d.r. 50:50                   | W=88%<br>d.r. 87:13                            |
| KOH                             | W=85 %<br>d.r. 88:12 | W=95%<br>d.r. 96:4       | W=88%<br>d.r. 70:30    | W=95%<br>d.r. 80:20 | W=80%<br>d.r. 80:20                   | W=95%<br>d.r. 96:4                             |
| 50% KOH <sub>aq</sub>           | W=87%<br>d.r. 80:20  | W=95%<br>d.r. 83:17      | W=61 %<br>d.r. 96:4    | W=80%<br>d.r. 99:1  | W=99%<br>d.r. 65:35                   | W=94%<br>d.r. 96:4                             |
| Cs <sub>2</sub> CO <sub>3</sub> | W=87%<br>d.r. 86:14  | W=91%<br>d.r. 96:4       | W=72%<br>d.r. 54:46    | W=78%<br>d.r. 82:18 | W=80 %<br>d.r. 85:15                  | W=99 %<br>d.r. 99:1                            |
| K <sub>2</sub> CO <sub>3</sub>  | No reaction          | No reaction              | W=65%<br>d.r. 98:2     | W=54%<br>d.r. >99:1 | W=76%<br>d.r. 97:3                    | W=98%<br>d.r. 96:4                             |
| BaCO <sub>3</sub>               | No reaction          | No reaction              | W=64%<br>d.r. >99:1    | W=66%<br>d.r. >99:1 | W=72%<br>d.r. >99:1                   | W=93%<br>d.r. 96:4                             |

**Table S3:** Effect of different bases on the reaction course at 10 kbar pressure and 2.5 mL of MTBE as a solvent

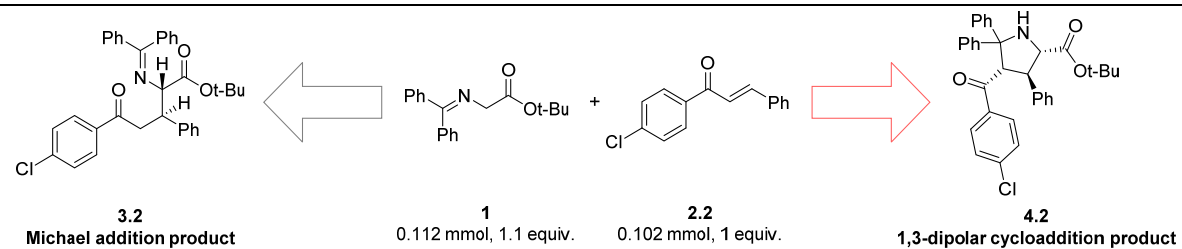

| Base<br>(5 equiv.)              | <br><b>5 mol%</b>   | <br><b>5 mol% + 50 mol% NEt<sub>3</sub></b><br><b>in 50 °C</b> |
|---------------------------------|---------------------|----------------------------------------------------------------|
| CsOH·H <sub>2</sub> O           | 96%<br>d.r. 84:16   | 94%<br>d.r. 96:4                                               |
| KOH                             | 96%<br>d.r. >99:1   | 95%<br>d.r. 96:4                                               |
| 50% KOH <sub>aq</sub>           | 63%<br>d.r. 80:20   | 94%<br>d.r. 92:8                                               |
| Cs <sub>2</sub> CO <sub>3</sub> | W=93%<br>d.r. 66:34 | 94 %<br>d.r. 93:7                                              |
| K <sub>2</sub> CO <sub>3</sub>  | No reaction         | 94%<br>d.r. 96:4                                               |
| BaCO <sub>3</sub>               | No reaction         | 99%<br>d.r. 98:2                                               |

| Table S4: Effect of different PTC catalyst on the reaction course                                                                                                                                                                                                                                                                                                    |       |                      |
|----------------------------------------------------------------------------------------------------------------------------------------------------------------------------------------------------------------------------------------------------------------------------------------------------------------------------------------------------------------------|-------|----------------------|
| <p> <math>\text{Ph-CH=N(Ph)-CH}_2\text{-CO}_2\text{t-Bu}</math> (1, 0.112 mmol, 1.1 equiv.) + <math>\text{Ph-CH=CH-CHO}</math> (2.1, 0.102 mmol, 1 equiv.) <math>\xrightarrow[\text{5 equiv. KOH, 2.5 mL MTBE, rt, 10 kbar, 48 h}]{\text{5 mol\% cat. PTC}}</math> <math>\text{Ph-CH=N(Ph)-CH}_2\text{-CH(Ph)-CH}_2\text{-CO}_2\text{t-Bu}</math> (3.1)         </p> |       |                      |
| PTC catalyst                                                                                                                                                                                                                                                                                                                                                         | Yield | Diastereomeric ratio |
|                                                                                                                                                                                                                                                                                                                                                                      | 88%   | 92:8                 |
|                                                                                                                                                                                                                                                                                                                                                                      | 93%   | 95:5                 |
|                                                                                                                                                                                                                                                                                                                                                                      | 92%   | 95:5                 |
|                                                                                                                                                                                                                                                                                                                                                                      | 92%   | 95:5                 |
|                                                                                                                                                                                                                                                                                                                                                                      | 90%   | 97:3                 |
|                                                                                                                                                                                                                                                                                                                                                                      | 95%   | 96:4                 |

**Table S5: Effect of different PTC catalyst formed *in situ* on the reaction course**

| Catalyst precursor 5 mol% and 50 mol% of amine                                                                                                    | Yield | Diastereomeric ratio |
|---------------------------------------------------------------------------------------------------------------------------------------------------|-------|----------------------|
| 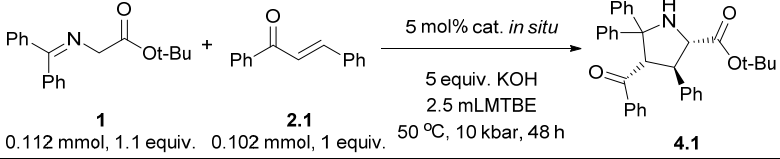 <p>1 (0.112 mmol, 1.1 equiv.) + 2.1 (0.102 mmol, 1 equiv.)</p> | 95%   | 96:4                 |
|  <p>5 + NE<sub>3</sub></p>                                       | 80%   | 90:10                |
|  <p>5 + N-methylmorpholine</p>                                  | 40%   | 95:5                 |

**Table S6:** Impact of pressure on the reaction course at 10 kbar pressure and 2.5 mL of MTBE as a solvent

| <br><b>3.1</b><br>Michael addition product                                         | <br><b>1</b><br>0.11 mmol | <br><b>2.1</b><br>0.1 mmol     | <br><b>4.1</b><br>1,3-dipolar cycloaddition product |
|------------------------------------------------------------------------------------|---------------------------|--------------------------------|-----------------------------------------------------|
| Conditions                                                                         | Pressure                  | Yield and diastereomeric ratio | Main product                                        |
| 5 mol% cat. <b>7</b> , 5 equiv. KOH, room temp., 48 hours                          | 10 kbar                   | 95%, d.r. 94:6                 | <b>3.1</b>                                          |
|                                                                                    | 8 kbar                    | 90%, d.r. 94:6                 | <b>3.1</b>                                          |
|                                                                                    | 5 kbar                    | 90%, d.r. 92:8                 | <b>3.1</b>                                          |
|                                                                                    | atmospheric pressure      | 52%, d.r. 69:31                | <b>3.1</b>                                          |
| 5 mol% of <b>5</b> and 50 mol% of NEt <sub>3</sub> , 5 equiv. KOH, 50 °C, 48 hours | 10 kbar                   | 95%, d.r. 94:6                 | <b>4.1</b>                                          |
|                                                                                    | 8 kbar                    | 87%, d.r. 89:11                | <b>4.1</b>                                          |
|                                                                                    | 5 kbar                    | 82%, d.r. 63:37                | <b>4.1</b>                                          |
|                                                                                    | atmospheric pressure      | 65%, d.r. 59:41                | <b>4.1</b>                                          |

## 2. Synthetic procedures and substance analysis

### 2.1. General remarks

All solvents and reagents were obtained from common suppliers and used as received. Flash column chromatography was performed on silica gel (230–400 mesh), thin-layer chromatography (TLC) was carried out on aluminium sheets precoated with silica gel.  $^1\text{H}$  NMR and  $^{13}\text{C}\{^1\text{H}\}$  NMR spectra were recorded on Varian 600, Varian 500 and on Bruker Mercury. Chemical shifts are reported in ppm and are set to solvent residue peak (chloroform- $d_3$  and acetone- $d_6$ ). The splitting pattern of multiplets is described by abbreviations (s – singlet, d – doublet, t – triplet, q – quartet, dd – doublet of doublets, m – multiplet, c – covered signal, b – broad peak).  $J$  coupling constants values are reported in Hz. Melting points were determined using a Boëtius M HMK hot-stage apparatus and were uncorrected. High resolution mass spectra (HRMS) performed with the ESI-TOF technique on a Mariner mass spectrometer from PerSeptive Biosystem.

### 2.2. Synthetic procedures

#### **General Procedure A** for obtaining $\alpha,\beta$ -unsaturated ketones

In accordance with the modified literature procedure.<sup>3</sup> To a solution of KOH in water (8 g of KOH in 8 mL of water) the solution of appropriate methyl ketone (1.0 equiv., 5.0 mmol) and aldehyde (1.0 equiv, 5.0 mmol) in MeOH (10 mL) at 0 °C was added dropwise. Typically, the mixture started to solidified during addition of substrates. The reaction was monitored by TLC. After completion, H<sub>2</sub>O (150 mL) was added at 0 °C and the resulting precipitate filtered. Recrystallization from EtOH afforded the pure  $\alpha,\beta$ -unsaturated ketones. In the cases where precipitation did not occur, the reaction mixture was extracted with DCM (3 x 50 mL). Organic layers were combined, washed with brine, dried over Na<sub>2</sub>SO<sub>4</sub>, filtered and evaporated to dryness in vacuo. Subsequent purification by flash column chromatography using hexane:ethyl acetate (95:5→9:1) as an eluent afforded the pure products.

#### **General Procedure B** for obtaining $\alpha,\beta$ -unsaturated ketones

In accordance with the modified literature procedure.<sup>4</sup> To a solution of the appropriate methyl ketone (1.0 equiv., 5.0 mmol) and aldehyde (1.0 equiv., 5.0 mmol) in MeOH (10 mL) at 0 °C was added a 10% aqueous solution of KOH (30 mL, dropwise). Typically, the mixture started to solidified after 15 minutes. The reaction was monitored by TLC. After completion of the reaction, H<sub>2</sub>O (150 mL) was added at 0 °C and the resulting precipitate was filtered. Recrystallization from EtOH afforded the pure  $\alpha,\beta$ -unsaturated ketones. In the cases where precipitation did not occur, the reaction mixture was extracted with DCM (3 x 50 mL). Organic



layers were combined, washed with brine, dried over Na<sub>2</sub>SO<sub>4</sub>, filtered and evaporated to dryness in vacuo. Subsequent purification by flash column chromatography using hexane:ethyl acetate (95:5→9:1) as an eluent afforded the pure products.

**General Procedure C** for obtaining Michael adducts **3.2-3.23**

Glycine ketamine **1** (33 mg, 0.112 mmol, 1.1 equiv.), appropriate  $\alpha$ ,  $\beta$ -unsaturated ketone (1 equiv., 0.102 mmol), PTC **7** catalyst (3.5 mg, 5 mol%, 0.0051 mmol) and KOH (5 equiv., 28.5 mg, 0.510 mmol) were placed into a 2.5 mL Teflon reaction vessel. Then the reaction vessel was filled with MTBE and screwed tightly to avoid any air bubbles inside. The reaction was carried out in a high-pressure apparatus for 48 hours, using a pressure of 10kbar. After complexation, the reaction mixture was filtered through a pad of silica gel and magnesium sulphate, washing the product with DCM. After concentration, the crude product was purified by preparative HPLC (loading as a solution in DCM), eluting with a solvent system of 5% AcOEt + 1% NEt<sub>3</sub> in hexane to separate the excess of ketamine **1**. Combined fractions were concentrated and dried to receive the final compound.

In experiments on larger scale glycine ketamine **1** (330 mg, 1.12 mmol, 1.1 equiv.),  $\alpha$ ,  $\beta$ -unsaturated ketone **2.1** (212 mg, 1.02 mmol, 1 equiv.), PTC **7** catalyst (35 mg, 5 mol%, 0.051 mmol) and KOH (5 equiv., 285 mg, 5.10 mmol) were placed into a 25 mL Teflon reaction vessel. After purification product were obtained as a clear oil (467 mg, 91%, d.r. 90:10).

**General Procedure D** for obtaining 1,3-dipolar cycloaddition products **4.2-4.21**

Glycine ketamine **1** (33 mg, 0.112 mmol, 1.1 equiv.), appropriate  $\alpha$ ,  $\beta$ -unsaturated ketone (1 equiv., 0.102 mmol), macrocyclic precursor **5** (3 mg, 5 mol%, 0.0051 mmol), NEt<sub>3</sub> (50  $\mu$ L, 5 ekw.) and KOH (5 equiv., 28.5 mg, 0.510 mmol) were placed into a 2.5 mL Teflon reaction vessel. Then the reaction vessel was filled with MTBE and screwed tightly to avoid any air bubbles inside. The reaction was carried out in a high-pressure apparatus for 48 hours, using a pressure of 10kbar and temperature 50 °C. After complexation, the reaction mixture was filtered through a pad of silica gel and magnesium sulphate, washing the product with DCM. After concentration, the crude product was purified by preparative HPLC (loading as a solution in DCM), eluting with a solvent system of 5% AcOEt + 1% NEt<sub>3</sub> in hexane to separate the excess of ketamine **1**. Combined fractions were concentrated and dried to receive the final compound.

In experiments on larger scale glycine ketamine **1** (330 mg, 1.12 mmol, 1.1 equiv.),  $\alpha$ ,  $\beta$ -unsaturated ketone **2.1** (212 mg, 1.02 mmol, 1 equiv.), macrocyclic precursor **5** (30 mg, 5 mol%, 0.051 mmol), NEt<sub>3</sub> (500  $\mu$ L, 5 ekw.) and KOH (5 equiv., 285 mg, 5.10 mmol) were placed into a 25 mL Teflon reaction vessel. After purification product were obtained as a clear oil (410 mg, 80%, d.r. 92:8).

### 2.3. Substance analysis

|                                                                                     |                                                                                                                                                                                                                                                                                                                                                                                                                                                                                                                                                                                                                                                                                                                                                               |
|-------------------------------------------------------------------------------------|---------------------------------------------------------------------------------------------------------------------------------------------------------------------------------------------------------------------------------------------------------------------------------------------------------------------------------------------------------------------------------------------------------------------------------------------------------------------------------------------------------------------------------------------------------------------------------------------------------------------------------------------------------------------------------------------------------------------------------------------------------------|
| 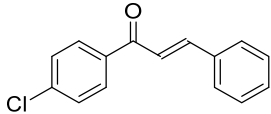   | <p>Following Procedure A and using 4-chloroacetophenone (776 mg, 5 mmoli) and benzaldehyde (530 mg, 5mmoli) as starting materials, compound <b>2.2</b> was obtained as yellowish crystals (1068 mg, 88%).<sup>5,8</sup></p> <p><b><sup>1</sup>H NMR</b> (400 MHz, CDCl<sub>3</sub>) δ 8.00 – 7.93 (m, 2H), 7.81 (d, <i>J</i> = 15.7 Hz, 1H), 7.68 – 7.60 (m, 2H), 7.54 – 7.37 (m, 6H). <b><sup>13</sup>C NMR</b> (101 MHz, CDCl<sub>3</sub>) δ 189.1, 145.3, 139.2, 136.5, 134.7, 130.7, 129.9, 129.0, 128.9, 128.5, 121.6.</p>                                                                                                                                                                                                                               |
|    | <p>Following Procedure A and using acetophenone (601 mg, 5 mmol) and 4-chlorobenzaldehyde (703 mg, 5mmoli) as starting materials, compound <b>2.3</b> was obtained as yellowish crystals (1043 mg, 86%).<sup>3,7</sup></p> <p><b><sup>1</sup>H NMR</b> (400 MHz, CDCl<sub>3</sub>) δ 8.04 – 7.97 (m, 1H), 7.76 (d, <i>J</i> = 15.7 Hz, 1H), 7.63 – 7.54 (m, 2H), 7.54 – 7.45 (m, 2H), 7.39 (d, <i>J</i> = 8.5 Hz, 1H). <b><sup>13</sup>C NMR</b> (101 MHz, CDCl<sub>3</sub>) δ 190.2, 143.3, 138.1, 136.4, 133.4, 132.9, 129.6, 129.2, 128.7, 128.5, 122.5.</p>                                                                                                                                                                                               |
|   | <p>Following Procedure A and using 4-bromoacetophenone (995 mg, 5 mmol) and benzaldehyde (530 mg, 5mmoli) as starting materials, compound <b>2.4</b> was obtained as yellowish crystals (1307 mg, 92%).<sup>6,7</sup></p> <p><b><sup>1</sup>H NMR</b> (500 MHz, cdcl<sub>3</sub>) δ 7.83 – 7.77 (m, 2H), 7.73 (d, <i>J</i> = 15.7 Hz, 1H), 7.58 – 7.52 (m, 4H), 7.39 (d, <i>J</i> = 15.7 Hz, 1H), 7.36 – 7.31 (m, 3H). <b><sup>13</sup>C NMR</b> (126 MHz, cdcl<sub>3</sub>) δ 189.3, 145.4, 136.9, 134.7, 131.9, 130.7, 130.0, 128.9, 128.5, 127.9, 121.5.</p>                                                                                                                                                                                               |
|  | <p>Following Procedure A and using acetophenone (601 mg, 5 mmol) and 4-bromobenzaldehyde (925 mg, 5mmoli) as starting materials, compound <b>2.5</b> was obtained as yellowish crystals (1278 mg, 89%).<sup>3,7</sup></p> <p><b><sup>1</sup>H NMR</b> (400 MHz, CDCl<sub>3</sub>) δ 8.01 (d, <i>J</i> = 5.3, 3.4 Hz, 1H), 7.74 (d, <i>J</i> = 15.7 Hz, 1H), 7.63 – 7.46 (m, 4H). <b><sup>13</sup>C NMR</b> (101 MHz, CDCl<sub>3</sub>) δ 190.2, 143.3, 138.0, 133.8, 132.9, 132.2, 129.8, 128.7, 128.5, 124.8, 122.6.</p>                                                                                                                                                                                                                                     |
|  | <p>Following Procedure A and using 4-fluoroacetophenone (776 mg, 5 mmol) and benzaldehyde (530 mg, 5mmoli) as starting materials, compound <b>2.6</b> was obtained as yellowish crystals (1018 mg, 90%).<sup>7,8</sup></p> <p><b><sup>1</sup>H NMR</b> (400 MHz, CDCl<sub>3</sub>) δ 8.05 (dd, <i>J</i> = 7.6, 5.5 Hz, 2H), 7.81 (d, <i>J</i> = 15.7 Hz, 1H), 7.64 (d, <i>J</i> = 2.9 Hz, 2H), 7.59 – 7.34 (m, 4H), 7.19 (dd, <i>J</i> = 24.6, 16.8 Hz, 2H). <b><sup>13</sup>C NMR</b> (101 MHz, CDCl<sub>3</sub>) δ 188.80, 165.6 (d, <i>J</i><sub>C-F</sub> = 252.9 Hz), 145.0, 134.8, 134.6 (d, <i>J</i><sub>C-F</sub> = 2.8 Hz), 131.1 (d, <i>J</i><sub>C-F</sub> = 9.1 Hz), 130.6, 128.9, 128.5, 121.6, 115.7 (d, <i>J</i><sub>C-F</sub> = 22.0 Hz).</p> |

|                                                                                     |                                                                                                                                                                                                                                                                                                                                                                                                                                                                                                                                                                                                                                                                                                                                        |
|-------------------------------------------------------------------------------------|----------------------------------------------------------------------------------------------------------------------------------------------------------------------------------------------------------------------------------------------------------------------------------------------------------------------------------------------------------------------------------------------------------------------------------------------------------------------------------------------------------------------------------------------------------------------------------------------------------------------------------------------------------------------------------------------------------------------------------------|
| 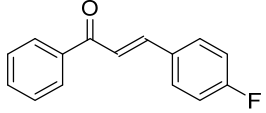   | <p>Following Procedure A and using acetophenone (601 mg, 5 mmol) and 4-fluorobenzaldehyde (620mg, 5mmoli) as starting materials, compound <b>2.7</b> was obtained as yellowish crystals (1052 mg, 93%).<sup>8</sup></p> <p><b><sup>1</sup>H NMR</b> (400 MHz, CDCl<sub>3</sub>) δ 8.01 (d, <i>J</i> = 7.4 Hz, 2H), 7.77 (d, <i>J</i> = 15.7 Hz, 1H), 7.67 – 7.54 (m, 3H), 7.54 – 7.38 (m, 3H), 7.10 (t, <i>J</i> = 8.5 Hz, 2H). <b><sup>13</sup>C NMR</b> (101 MHz, CDCl<sub>3</sub>) δ 190.3, 164.1 (d, <i>J</i><sub>C-F</sub> = 251.9 Hz), 143.5, 138.2, 132.8, 131.2 (d, <i>J</i><sub>C-F</sub> = 3.3 Hz), 130.4, 130.3, 128.6, 128.5, 121.8 (d, <i>J</i><sub>C-F</sub> = 2.3 Hz), 116.1 (d, <i>J</i><sub>C-F</sub> = 21.9 Hz).</p> |
|    | <p>Following Procedure B and using acetophenone (601 mg, 5 mmol) and 4-(trifluoromethyl)benzaldehyde (871 mg, 5mmoli) as starting materials, compound <b>2.8</b> was obtained as yellow flakes (870 mg, 63%).<sup>8</sup></p> <p><b><sup>1</sup>H NMR</b> (400 MHz, CDCl<sub>3</sub>) δ 8.03 (d, <i>J</i> = 7.1 Hz, 2H), 7.90 – 7.40 (m, 9H). <b><sup>13</sup>C NMR</b> (101 MHz, CDCl<sub>3</sub>) δ 190.0, 142.7, 138.3, 137.8, 133.1, 128.7, 128.5, 128.5, 126.4, 125.4, 125.2, 124.3.</p>                                                                                                                                                                                                                                          |
|    | <p>Following Procedure B and using acetophenone (601 mg, 5 mmol) and 4-cyanobenzaldehyde (606 mg, 5mmoli) as starting materials, compound <b>2.9</b> was obtained as yellowish crystals (851 mg, 73%).<sup>3</sup></p> <p><b><sup>1</sup>H NMR</b> (400 MHz, CDCl<sub>3</sub>) δ 8.02 (d, <i>J</i> = 7.0 Hz, 2H), 7.65 (m, 9H). <b><sup>13</sup>C NMR</b> (101 MHz, CDCl<sub>3</sub>) δ 189.7, 142.0, 139.2, 137.7, 133.3, 132.7, 125.1, 118.3, 113.5, 29.7.</p>                                                                                                                                                                                                                                                                       |
|  | <p>Following Procedure A and using 4-methylacetophenone (671 mg, 5 mmol) and benzaldehyde (530 mg, 5mmoli) as starting materials, compound <b>2.10</b> was obtained as yellowish crystals (856 mg, 77%).<sup>5,8</sup></p> <p><b><sup>1</sup>H NMR</b> (400 MHz, CDCl<sub>3</sub>) δ 7.94 (d, <i>J</i> = 8.1 Hz, 2H), 7.81 (d, <i>J</i> = 15.7 Hz, 1H), 7.63 (dd, <i>J</i> = 6.4, 2.8 Hz, 2H), 7.53 (d, <i>J</i> = 15.7 Hz, 1H), 7.41 (dd, <i>J</i> = 4.9, 1.6 Hz, 3H), 7.30 (d, <i>J</i> = 8.0 Hz, 2H), 2.43 (s, 3H). <b><sup>13</sup>C NMR</b> (101 MHz, CDCl<sub>3</sub>) δ 189.9, 144.4, 143.6, 135.7, 135.0, 130.4, 129.3, 128.9, 128.7, 128.4, 122.2, 21.7.</p>                                                                  |
|  | <p>Following Procedure A and using acetophenone (601 mg, 5 mmol) and 4-methylbenzaldehyde (606 mg, 5mmoli) as starting materials, compound <b>2.11</b> was obtained as yellowish crystals (889 mg, 80%).<sup>8</sup></p> <p><b><sup>1</sup>H NMR</b> (400 MHz, CDCl<sub>3</sub>) δ 8.05 – 7.98 (m, 2H), 7.79 (d, <i>J</i> = 15.7 Hz, 1H), 7.62 – 7.45 (m, 6H), 7.23 (d, <i>J</i> = 8.0 Hz, 2H), 2.39 (s, 3H). <b><sup>13</sup>C NMR</b> (101 MHz, CDCl<sub>3</sub>) δ 190.6, 144.9, 141.1, 138.4, 132.6, 132.2, 129.7, 128.6, 128.5, 128.5, 121.2, 21.5.</p>                                                                                                                                                                           |

|                                                                                     |                                                                                                                                                                                                                                                                                                                                                                                                                                                                                                                                                                                                                                                                    |
|-------------------------------------------------------------------------------------|--------------------------------------------------------------------------------------------------------------------------------------------------------------------------------------------------------------------------------------------------------------------------------------------------------------------------------------------------------------------------------------------------------------------------------------------------------------------------------------------------------------------------------------------------------------------------------------------------------------------------------------------------------------------|
| 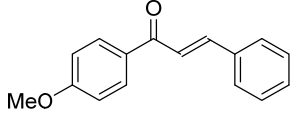   | <p>Following Procedure A and using 4-methoxyacetophenone (751 mg, 5 mmol) and benzaldehyde (530 mg, 5mmoli) as starting materials, compound <b>2.12</b> was obtained as yellowish crystals (990 mg, 83%).<sup>5,6,7</sup></p> <p><b><sup>1</sup>H NMR</b> (400 MHz, CDCl<sub>3</sub>) δ 8.04 (d, <i>J</i> = 8.8 Hz, 2H), 7.80 (d, <i>J</i> = 15.7 Hz, 1H), 7.69 – 7.60 (m, 2H), 7.54 (d, <i>J</i> = 15.7 Hz, 1H), 7.47 – 7.33 (m, 3H), 6.99 (d, <i>J</i> = 8.8 Hz, 2H), 3.89 (s, <i>J</i> = 11.0 Hz, 3H). <b><sup>13</sup>C NMR</b> (101 MHz, CDCl<sub>3</sub>) δ 188.7, 163.5, 143.9, 135.1, 131.1, 130.8, 130.3, 128.9, 128.4, 121.9, 113.9, 55.5.</p>           |
|    | <p>Following Procedure A and using acetophenone (601 mg, 5 mmol) and 4-methoxybenzaldehyde (681 mg, 5mmoli) as starting materials, compound <b>2.13</b> was obtained as yellowish crystals (1132 mg, 95%).<sup>7,8</sup></p> <p><b><sup>1</sup>H NMR</b> (400 MHz, CDCl<sub>3</sub>) δ 8.01 (d, <i>J</i> = 7.1 Hz, 2H), 7.79 (d, <i>J</i> = 15.7 Hz, 1H), 7.58 (dd, <i>J</i> = 16.2, 8.0 Hz, 3H), 7.50 (t, <i>J</i> = 7.4 Hz, 2H), 7.41 (d, <i>J</i> = 15.6 Hz, 1H), 6.94 (d, <i>J</i> = 8.6 Hz, 2H), 3.86 (s, 3H). <b><sup>13</sup>C NMR</b> (101 MHz, CDCl<sub>3</sub>) δ 190.6, 161.7, 144.7, 138.5, 132.5, 130.2, 128.6, 128.4, 127.7, 119.9, 114.4, 55.4.</p> |
|   | <p>Following Procedure B and using acetophenone (601 mg, 5 mmol) and 2-chlorobenzaldehyde (703 mg, 5mmoli) as starting materials, compound <b>2.14</b> was obtained as yellowish crystals (364 mg, 30%).<sup>9</sup></p> <p><b><sup>1</sup>H NMR</b> (400 MHz, CDCl<sub>3</sub>) δ 8.18 (d, <i>J</i> = 15.8 Hz, 1H), 8.01 (dd, <i>J</i> = 5.2, 3.3 Hz, 2H), 7.75 (dd, <i>J</i> = 6.9, 2.5 Hz, 1H), 7.62 – 7.56 (m, 1H), 7.55 – 7.41 (m, 4H), 7.36 – 7.28 (m, 2H). <b><sup>13</sup>C NMR</b> (101 MHz, CDCl<sub>3</sub>) δ 190.5, 140.6, 137.9, 135.5, 133.3, 132.9, 131.1, 130.3, 128.6, 128.6, 127.8, 127.1, 124.9.</p>                                           |
|  | <p>Following Procedure B and using acetophenone (601 mg, 5 mmol) and 3-chlorobenzaldehyde (703 mg, 5mmoli) as starting materials, compound <b>2.15</b> was obtained as yellowish crystals (813 mg, 67%).<sup>9</sup></p> <p><b><sup>1</sup>H NMR</b> (500 MHz, cdcl<sub>3</sub>) δ 7.98 – 7.90 (m, 2H), 7.65 (d, <i>J</i> = 15.7 Hz, 1H), 7.57 – 7.49 (m, 2H), 7.45 (d, <i>J</i> = 7.2 Hz, 1H), 7.44 – 7.39 (m, 3H), 7.32 – 7.26 (m, 2H). <b><sup>13</sup>C NMR</b> (126 MHz, cdcl<sub>3</sub>) δ 190.1, 143.0, 137.9, 136.7, 134.9, 133.0, 130.3, 130.2, 128.7, 128.5, 127.9, 126.8, 123.2.</p>                                                                   |
|  | <p>Following Procedure B and using acetophenone (601 mg, 5 mmol) and 2-methoxybenzaldehyde (681 mg, 5mmoli) as starting materials, compound <b>2.16</b> was obtained as yellow solid (870 mg, 73%).<sup>8</sup></p> <p><b><sup>1</sup>H NMR</b> (400 MHz, CDCl<sub>3</sub>) δ 8.12 (d, <i>J</i> = 15.9 Hz, 1H), 8.05 – 7.97 (m, 2H), 7.66 – 7.53 (m, 3H), 7.52 – 7.46 (m, 2H), 7.38 (ddd, <i>J</i> = 8.3, 7.4, 1.7 Hz, 1H), 6.99 (td, <i>J</i> = 7.5, 1.1 Hz, 1H), 6.94 (dd, <i>J</i> = 8.3, 1.1 Hz, 1H), 3.91 (s, 3H).</p>                                                                                                                                        |

|                                                                                     |                                                                                                                                                                                                                                                                                                                                                                                                                                                                                                                                                                                                                                                                                                         |
|-------------------------------------------------------------------------------------|---------------------------------------------------------------------------------------------------------------------------------------------------------------------------------------------------------------------------------------------------------------------------------------------------------------------------------------------------------------------------------------------------------------------------------------------------------------------------------------------------------------------------------------------------------------------------------------------------------------------------------------------------------------------------------------------------------|
|                                                                                     | <sup>13</sup> C NMR (101 MHz, CDCl <sub>3</sub> ) δ 191.1, 158.8, 140.4, 138.6, 132.5, 131.7, 129.2, 128.5, 123.9, 122.9, 120.8, 111.3, 55.6.                                                                                                                                                                                                                                                                                                                                                                                                                                                                                                                                                           |
| 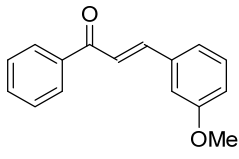   | Following Procedure B and using acetophenone (601 mg, 5 mmol) and 3-methoxybenzaldehyde (681 mg, 5mmoli) as starting materials, compound <b>2.17</b> was obtained as yellow solid (727 mg, 61%). <sup>8</sup><br><br><sup>1</sup> H NMR (400 MHz, CDCl <sub>3</sub> ) δ 8.01 (dd, <i>J</i> = 8.4, 1.4 Hz, 2H), 7.77 (d, <i>J</i> = 15.7 Hz, 1H), 7.62 – 7.55 (m, 1H), 7.54 – 7.44 (m, 3H), 7.33 (t, <i>J</i> = 7.9 Hz, 1H), 7.27 – 7.21 (m, 1H), 7.15 (dd, <i>J</i> = 2.6, 1.6 Hz, 1H), 6.96 (ddd, <i>J</i> = 8.2, 2.6, 1.0 Hz, 1H), 3.85 (s, 3H). <sup>13</sup> C NMR (101 MHz, CDCl <sub>3</sub> ) δ 190.5, 159.9, 144.7, 138.2, 136.3, 132.8, 129.9, 128.6, 128.5, 122.5, 121.1, 116.3, 113.5, 55.4. |
|    | Following Procedure B and using 2-acetylbenzothiophene (882 mg, 5 mmol) and benzaldehyde (530 mg, 5 mmol) as starting materials, compound <b>2.18</b> was obtained as yellowish crystals (950 mg, 72%). <sup>10</sup><br><br><sup>1</sup> H NMR (500 MHz, CDCl <sub>3</sub> ) δ 8.12 (s, 1H), 7.98 – 7.84 (m, 3H), 7.69 (dd, <i>J</i> = 6.6, 2.7 Hz, 2H), 7.55 (d, <i>J</i> = 15.6 Hz, 1H), 7.51 – 7.38 (m, 5H). <sup>13</sup> C NMR (126 MHz, CDCl <sub>3</sub> ) δ 183.4, 145.2, 144.4, 142.7, 139.3, 134.7, 130.7, 129.0, 128.8, 128.6, 127.4, 125.9, 125.0, 123.0, 121.2.                                                                                                                           |
|  | Following Procedure B and using 2-acetylfurane (550 mg, 5 mmol) and benzaldehyde (530 mg, 5mmoli) as starting materials, compound <b>2.19</b> was obtained as beige crystals (922 mg, 93%). <sup>8</sup><br><br><sup>1</sup> H NMR (400 MHz, CDCl <sub>3</sub> ) δ 7.88 (d, <i>J</i> = 15.8 Hz, 1H), 7.65 (dt, <i>J</i> = 4.1, 2.7 Hz, 3H), 7.45 (d, <i>J</i> = 15.8 Hz, 1H), 7.42 – 7.39 (m, 3H), 7.33 (dd, <i>J</i> = 3.7, 0.8 Hz, 1H), 6.59 (dd, <i>J</i> = 3.5, 1.7 Hz, 1H). <sup>13</sup> C NMR (101 MHz, CDCl <sub>3</sub> ) δ 178.0, 154.4, 146.5, 143.9, 134.8, 130.6, 128.9, 128.5, 121.2, 117.5, 112.5.                                                                                       |
|  | Following Procedure A and using 2-acetylnaphthalene (851 mg, 5 mmol) and benzaldehyde (530 mg, 5mmoli) as starting materials, compound <b>2.20</b> was obtained as yellowish crystals (1175mg, 91%). <sup>5,8</sup><br><br><sup>1</sup> H NMR (400 MHz, CDCl <sub>3</sub> ) δ 8.54 (s, 1H), 8.11 (d, <i>J</i> = 7.8 Hz, 1H), 7.99 (d, <i>J</i> = 6.9 Hz, 1H), 7.98 – 7.83 (m, 3H), 7.78 – 7.66 (m, 3H), 7.60 (dd, <i>J</i> = 15.4, 7.5 Hz, 2H), 7.44 (d, <i>J</i> = 2.3 Hz, 3H). <sup>13</sup> C NMR (101 MHz, CDCl <sub>3</sub> ) δ 190.3, 144.8, 135.6, 135.5, 135.0, 132.6, 130.5, 129.9, 129.5, 129.0, 128.6, 128.5, 128.4, 127.8, 126.8, 124.5, 122.2.                                             |
|  | Following Procedure B and using acetophenone (601 mg, 5 mmol) and 2-naphthaldehyde (776 mg, 5mmoli) as starting materials, compound <b>2.21</b> was obtained as yellowish crystals (1150 mg, 89%). <sup>4,9</sup><br><br><sup>1</sup> H NMR (400 MHz, CDCl <sub>3</sub> ) δ 8.05 (dd, <i>J</i> = 6.8, 5.3 Hz, 3H), 7.98 (d, <i>J</i> = 15.7 Hz, 1H), 7.87 (dt, <i>J</i> = 14.8, 5.2 Hz, 3H), 7.80 (dd, <i>J</i> = 8.6, 1.5 Hz, 1H), 7.62 (dd, <i>J</i> = 21.1, 11.6 Hz, 2H), 7.52 (dd, <i>J</i> = 8.6, 4.7 Hz, 4H). <sup>13</sup> C NMR (101                                                                                                                                                            |

|                                                                                                                     |                                                                                                                                                                                                                                                                                                                                                                                                                                                                                                                                                                                                                                                                                                                                                                                                                                                                                                                       |
|---------------------------------------------------------------------------------------------------------------------|-----------------------------------------------------------------------------------------------------------------------------------------------------------------------------------------------------------------------------------------------------------------------------------------------------------------------------------------------------------------------------------------------------------------------------------------------------------------------------------------------------------------------------------------------------------------------------------------------------------------------------------------------------------------------------------------------------------------------------------------------------------------------------------------------------------------------------------------------------------------------------------------------------------------------|
|                                                                                                                     | MHz, CDCl <sub>3</sub> ) δ 190.5, 144.9, 143.6, 138.3, 134.4, 133.4, 132.8, 132.4, 130.6, 128.7, 128.6, 128.5, 127.8, 127.4, 126.8, 123.7, 122.3.                                                                                                                                                                                                                                                                                                                                                                                                                                                                                                                                                                                                                                                                                                                                                                     |
| 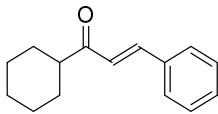                                   | Following Procedure B and using 1-cyclohexylethanone (631 mg, 5 mmol) and benzaldehyde (530 mg, 5mmoli) as starting materials, compound <b>2.22</b> was obtained as white flakes (997 mg, 93%). <sup>6</sup><br><br><b><sup>1</sup>H NMR</b> (400 MHz, CDCl <sub>3</sub> ) δ 7.63 – 7.49 (m, 3H), 7.42 – 7.30 (m, 3H), 6.81 (d, <i>J</i> = 16.0 Hz, 1H), 2.65 (tt, <i>J</i> = 11.3, 3.3 Hz, 1H), 1.95 – 1.62 (m, 5H), 1.51 – 1.16 (m, 5H). <b><sup>13</sup>C NMR</b> (101 MHz, CDCl <sub>3</sub> ) δ 203.1, 142.2, 134.8, 130.3, 128.9, 128.2, 124.7, 49.4, 28.7, 25.9, 25.8.                                                                                                                                                                                                                                                                                                                                         |
|                                    | Following Procedure B and using 3-methyl-2-butanone (430 mg, 5 mmol) and benzaldehyde (530 mg, 5mmoli) as starting materials, compound <b>2.23</b> was obtained as yellow oil (261mg, 30%). <sup>11</sup><br><br><b><sup>1</sup>H NMR</b> (400 MHz, CDCl <sub>3</sub> ) δ 7.61 (d, <i>J</i> = 16.0 Hz, 1H), 7.58 – 7.53 (m, 1H), 7.38 (dd, <i>J</i> = 4.2, 2.4 Hz, 3H), 6.82 (d, <i>J</i> = 16.0 Hz, 1H), 2.93 (dt, <i>J</i> = 13.8, 6.9 Hz, 1H), 1.18 (d, <i>J</i> = 6.9 Hz, 7H). <b><sup>13</sup>C NMR</b> (101 MHz, CDCl <sub>3</sub> ) δ 203.8, 142.4, 134.7, 130.3, 128.9, 128.3, 124.5, 39.3, 18.5.                                                                                                                                                                                                                                                                                                             |
| <br><b>3.1</b> , 95%, d.r. 94:6   | Following Procedure C using α,β-unsaturated ketone <b>2.1</b> (21 mg, 0.102 mmol) as starting material, compound <b>3.1</b> was obtained as clear oil (49 mg, 95%). <sup>12,13,14,15</sup><br><br><b><sup>1</sup>H NMR</b> (400 MHz, Acetone) δ 7.97 (dd, <i>J</i> = 5.2, 3.3 Hz, 2H), 7.71 – 7.65 (m, 2H), 7.61 – 7.55 (m, 1H), 7.51 – 7.35 (m, 8H), 7.23 – 7.09 (m, 5H), 6.88 (dd, <i>J</i> = 7.0, 2.3 Hz, 2H), 4.26 – 4.16 (m, 2H), 3.79 – 3.58 (m, 2H), 1.28 (s, 9H). <b><sup>13</sup>C NMR</b> (101 MHz, Acetone) δ 198.9, 171.9, 170.5, 142.9, 140.6, 138.5, 137.5, 133.8, 131.5, 129.8, 129.7, 129.6, 129.6, 129.4, 129.2, 129.06, 129.05, 128.7, 127.5, 81.6, 72.2, 46.1, 41.2, 28.2. <b>HPLC</b> : Kromasil OD-H, Hexane:2-Propanol (98:2), 0.5 mL/min, 254 nm; retention time: 11.48 min, 15.08 min.                                                                                                        |
| <br><b>3.2</b> , 96%, d.r. >99:1 | Following Procedure C using α,β-unsaturated ketone <b>2.2</b> (24.5 mg, 0.102 mmol) as starting material, compound <b>3.2</b> was obtained as clear foam (52 mg, 96%, mp 129.6 °C). <sup>12,14,15</sup><br><br><b><sup>1</sup>H NMR</b> (500 MHz, acetone) δ 7.98 (d, <i>J</i> = 8.4 Hz, 1H), 7.69 (d, <i>J</i> = 8.5 Hz, 1H), 7.57 (dt, <i>J</i> = 13.1, 6.8 Hz, 2H), 7.51 – 7.42 (m, 6H), 7.38 (t, <i>J</i> = 7.4 Hz, 2H), 7.23 (d, <i>J</i> = 3.4 Hz, 3H), 6.99 – 6.90 (m, 1H), 4.25 – 4.17 (m, 1H), 3.80 – 3.71 (m, 1H), 3.65 (dd, <i>J</i> = 17.1, 2.9 Hz, 1H), 1.29 (s, 9H). <b><sup>13</sup>C NMR</b> (126 MHz, acetone) δ 197.6, 171.0, 169.2, 140.8, 139.4, 137.2, 136.2, 132.8, 132.4, 131.8, 130.5, 129.7, 128.6, 128.5, 128.4, 128.1, 127.9, 127.9, 127.5, 80.7, 70.8, 44.4, 40.0, 27.1. <b>HPLC</b> : Kromasil OD-H, Hexane:2-Propanol (98:2), 0.5 mL/min, 254 nm; retention time: 18.87 min, 22.01 min. |

|                                                                                                                         |                                                                                                                                                                                                                                                                                                                                                                                                                                                                                                                                                                                                                                                                                                                                                                                                                                                                                                                                                                                                                |
|-------------------------------------------------------------------------------------------------------------------------|----------------------------------------------------------------------------------------------------------------------------------------------------------------------------------------------------------------------------------------------------------------------------------------------------------------------------------------------------------------------------------------------------------------------------------------------------------------------------------------------------------------------------------------------------------------------------------------------------------------------------------------------------------------------------------------------------------------------------------------------------------------------------------------------------------------------------------------------------------------------------------------------------------------------------------------------------------------------------------------------------------------|
| 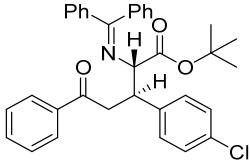 <p><b>3.3</b>, 90%, d.r. &gt;99:1</p> | <p>Following Procedure C using <math>\alpha,\beta</math>-unsaturated ketone <b>2.3</b> (24.5 mg, 0.102 mmol) as starting material, compound <b>3.3</b> was obtained as colorless solid (49 mg, 96%, mp 144.2 °C).<sup>13,14,15</sup></p> <p><b><sup>1</sup>H NMR</b> (400 MHz, Acetone) <math>\delta</math> 7.98 (d, <math>J</math> = 8.6 Hz, 2H), 7.73 – 7.63 (m, 2H), 7.58 (tt, <math>J</math> = 7.2, 1.2 Hz, 1H), 7.51 – 7.35 (m, 8H), 7.23 (d, <math>J</math> = 1.2 Hz, 4H), 6.95 (dd, <math>J</math> = 6.6, 2.9 Hz, 2H), 4.21 (q, <math>J</math> = 3.4 Hz, 2H), 3.81 – 3.58 (m, 2H), 3.64 (dd, <math>J</math> = 17.1, 3.3 Hz, 1H), 1.29 (s, 9H). <b><sup>13</sup>C NMR</b> (101 MHz, Acetone) <math>\delta</math> 198.7, 172.1, 170.3, 141.9, 140.5, 138.4, 137.3, 133.9, 132.8, 131.5, 131.5, 129.7, 129.7, 129.6, 129.5, 129.2, 129.02, 129.0, 128.6, 81.8, 71.8, 45.5, 41.1, 28.2. <b>HPLC</b>: Kromasil OD-H, Hexane:2-Propanol (98:2), 0.5 mL/min, 254 nm; retention time: 10.84 min, 14.07 min.</p> |
|  <p><b>3.4</b>, 98%, d.r. 99:1</p>     | <p>Following Procedure C using <math>\alpha,\beta</math>-unsaturated ketone <b>2.4</b> (29 mg, 0.102 mmol) as starting material, compound <b>3.4</b> was obtained as clear oil (58 mg, 98%).<sup>12,13</sup></p> <p><b><sup>1</sup>H NMR</b> (400 MHz, Acetone) <math>\delta</math> 8.02 – 7.94 (m, 2H), 7.71 – 7.64 (m, 2H), 7.59 (t, <math>J</math> = 7.4 Hz, 1H), 7.53 – 7.25 (m, 10H), 7.18 (d, <math>J</math> = 8.5 Hz, 2H), 6.94 (dd, <math>J</math> = 6.5, 3.0 Hz, 2H), 4.25 – 4.09 (m, 2H), 3.81 – 3.57 (m, 2H), 1.29 (s, 9H). <b><sup>13</sup>C NMR</b> (101 MHz, Acetone) <math>\delta</math> 171.0, 169.2, 141.3, 139.4, 137.3, 136.2, 132.8, 130.9, 130.8, 130.4, 128.6, 128.6, 128.5, 128.4, 128.1, 127.9, 127.5, 119.8, 80.7, 70.7, 44.4, 39.9, 27.1. <b>HPLC</b>: Diacel IC (5<math>\mu</math>m), Hexane:2-Propanol (98:2), 0.5 mL/min, 254 nm; retention time: 70.82 min, 89.60 min.</p>                                                                                                       |
|  <p><b>3.5</b>, 79%, d.r. 98:2</p>   | <p>Following Procedure C using <math>\alpha,\beta</math>-unsaturated ketone <b>2.5</b> (29 mg, 0.102 mmol) as starting material, compound <b>3.5</b> was obtained as clear oil (46 mg, 79%).<sup>15</sup></p> <p><b><sup>1</sup>H NMR</b> (500 MHz, acetone) <math>\delta</math> 7.98 (d, <math>J</math> = 8.4 Hz, 1H), 7.68 (d, <math>J</math> = 8.5 Hz, 2H), 7.59 (t, <math>J</math> = 7.4 Hz, 1H), 7.52 – 7.42 (m, 6H), 7.41 – 7.34 (m, 4H), 7.18 (d, <math>J</math> = 8.5 Hz, 1H), 6.94 (dd, <math>J</math> = 6.4, 3.0 Hz, 2H), 4.23 – 4.15 (m, 2H), 3.80 – 3.71 (m, 1H), 3.68 – 3.59 (m, 1H), 1.29 (s, 9H). <b><sup>13</sup>C NMR</b> (126 MHz, acetone) <math>\delta</math> 198.7, 172.1, 170.3, 142.4, 140.5, 138.3, 137.3, 133.9, 132.0, 131.9, 131.5, 129.7, 129.7, 129.6, 129.5, 129.2, 129.0, 128.6, 120.9, 81.8, 71.8, 45.5, 41.0. <b>HPLC</b>: Kromasil OD-H, Hexane:2-Propanol (98:2), 0.5 mL/min, 254 nm; retention time: 10.95 min, 14.41 min.</p>                                             |
|  <p><b>3.6</b>, 97%, d.r. 99:1</p>   | <p>Following Procedure C using <math>\alpha,\beta</math>-unsaturated ketone <b>2.6</b> (22.6 mg, 0.102 mmol) as starting material, compound <b>3.6</b> was obtained as clear oil (51 mg, 97%).</p> <p><b><sup>1</sup>H NMR</b> (500 MHz, acetone) <math>\delta</math> 8.11 – 8.03 (m, 2H), 7.68 (d, <math>J</math> = 7.1 Hz, 1H), 7.47 – 7.41 (m, 4H), 7.38 (t, <math>J</math> = 7.4 Hz, 2H), 7.26 – 7.11 (m, 7H), 6.88 (dd, <math>J</math> = 5.0, 2.5 Hz, 2H), 4.27 – 4.19 (m, 1H), 3.79 – 3.69 (m, 1H), 3.68 – 3.61 (m, 1H), 1.28 (s, 9H). <b><sup>13</sup>C NMR</b> (126 MHz, acetone) <math>\delta</math> 196.4, 170.8,</p>                                                                                                                                                                                                                                                                                                                                                                                |

|                                                                                                                          |                                                                                                                                                                                                                                                                                                                                                                                                                                                                                                                                                                                                                                                                                                                                                                                                                                                                                                                                                                                                                                                                                                                               |
|--------------------------------------------------------------------------------------------------------------------------|-------------------------------------------------------------------------------------------------------------------------------------------------------------------------------------------------------------------------------------------------------------------------------------------------------------------------------------------------------------------------------------------------------------------------------------------------------------------------------------------------------------------------------------------------------------------------------------------------------------------------------------------------------------------------------------------------------------------------------------------------------------------------------------------------------------------------------------------------------------------------------------------------------------------------------------------------------------------------------------------------------------------------------------------------------------------------------------------------------------------------------|
|                                                                                                                          | <p>169.4, 165.4 (d, <math>J = 251.8</math> Hz), 141.8, 139.5, 136.3, 134.0 (d, <math>J = 2.9</math> Hz), 130.9 (d, <math>J = 9.4</math> Hz), 130.4, 128.7, 128.61, 128.5, 128.3, 128.0, 127.97, 127.6, 126.5, 115.4 (d, <math>J = 22.0</math> Hz), 80.5, 71.0, 45.0, 40.1, 27.1. <b>HPLC:</b> Kromasil OD-H, Hexane:2-Propanol (98:2), 0.5 mL/min, 254 nm; retention time: 12.58 min, 14.56 min.</p>                                                                                                                                                                                                                                                                                                                                                                                                                                                                                                                                                                                                                                                                                                                          |
| 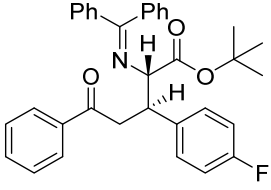 <p><b>3.7</b>, 97%, d.r. 98:2</p>      | <p>Following Procedure C using <math>\alpha,\beta</math>-unsaturated ketone <b>2.7</b> (22.6 mg, 0.102 mmol) as starting material, compound <b>3.7</b> was obtained as clear oil (51 mg, 97%).<sup>13,14,15</sup></p> <p><b><sup>1</sup>H NMR</b> (400 MHz, Acetone) <math>\delta</math> 7.98 (d, <math>J = 8.5</math> Hz, 2H), 7.73 – 7.65 (m, 2H), 7.58 (t, <math>J = 7.4</math> Hz, 1H), 7.52 – 7.42 (m, 6H), 7.42 – 7.34 (m, 2H), 7.28 – 7.20 (m, 2H), 7.01 – 6.89 (m, 4H), 4.29 – 4.17 (m, 2H), 3.78 – 3.58 (m, 2H), 1.29 (s, 9H). <b><sup>13</sup>C NMR</b> (101 MHz, Acetone) <math>\delta</math> 198.9, 172.1, 170.4, 140.6, 138.9, 138.5, 137.4, 133.9, 131.6, 131.6, 131.5, 129.7, 129.7, 129.6, 129.5, 129.2, 129.1, 128.7, 115.6 (d, <math>J = 22.0</math> Hz), 81.7, 72.1, 45.4, 41.4, 28.2. <b>HPLC:</b> Kromasil OD-H, Hexane:2-Propanol (98:2), 0.5 mL/min, 254 nm; retention time: 11.21 min, 15.38 min.</p>                                                                                                                                                                                                 |
|  <p><b>3.8</b>, 79%, d.r. &gt;99:1</p> | <p>Following Procedure C using <math>\alpha,\beta</math>-unsaturated ketone <b>2.8</b> (28 mg, 0.102 mmol) as starting material, compound <b>3.8</b> was obtained as colorless foam (45 mg, 79%, 96.2 °C).<sup>12</sup></p> <p><b><sup>1</sup>H NMR</b> (500 MHz, acetone) <math>\delta</math> 7.86 (d, <math>J = 7.7</math> Hz, 2H), 7.55 (d, <math>J = 7.5</math> Hz, 2H), 7.45 (t, <math>J = 7.4</math> Hz, 1H), 7.41 (d, <math>J = 8.2</math> Hz, 2H), 7.38 – 7.27 (m, 9H), 7.25 (t, <math>J = 7.6</math> Hz, 2H), 6.76 (d, <math>J = 6.3</math> Hz, 2H), 4.20 – 4.13 (m, 1H), 4.11 (d, <math>J = 6.0</math> Hz, 1H), 3.73 (dd, <math>J = 17.5, 9.9</math> Hz, 1H), 3.59 (dd, <math>J = 17.5, 3.8</math> Hz, 1H), 1.15 (s, 9H). <b><sup>13</sup>C NMR</b> (126 MHz, acetone) <math>\delta</math> 197.5, 171.2, 169.1, 146.7, 139.4, 137.2, 136.1, 132.9, 130.5, 129.5, 128.7, 128.6, 128.6, 128.4, 128.1, 127.9, 127.5, 124.8 (q, <math>J = 3.8</math> Hz), 80.9, 70.6, 44.7, 39.7, 27.1. <b>HPLC:</b> Kromasil OD-H, Hexane:2-Propanol (98:2), 0.5 mL/min, 254 nm; retention time: 9.98 min, 12.51 min.</p>              |
|  <p><b>3.9</b>, 70%, d.r. 83:17</p>   | <p>Following Procedure C using <math>\alpha,\beta</math>-unsaturated ketone <b>2.9</b> (23.3 mg, 0.102 mmol) as starting material, compound <b>3.8</b> was obtained as colorless foam (37 mg, 70%).</p> <p><b><sup>1</sup>H NMR</b> (400 MHz, Acetone) <math>\delta</math> 7.98 (d, <math>J = 7.4</math> Hz, 2H), 7.67 (d, <math>J = 7.2</math> Hz, 2H), 7.59 (t, <math>J = 8.2</math> Hz, 3H), 7.51 – 7.41 (m, 8H), 7.38 (t, <math>J = 7.4</math> Hz, 2H), 6.92 (d, <math>J = 3.5</math> Hz, 2H), 4.31 – 4.20 (m, 2H), 3.86 (dd, <math>J = 17.5, 9.4</math> Hz, 1H), 3.70 (dd, <math>J = 17.5, 3.7</math> Hz, 1H), 1.29 (s, 9H). <b><sup>13</sup>C NMR</b> (101 MHz, Acetone) <math>\delta</math> 197.5, 169.0, 147.8, 139.3, 137.2, 136.1, 132.9, 131.7, 130.5, 129.9, 129.7, 129.3, 128.7, 128.6, 128.4, 128.1, 127.9, 127.5, 110.3, 80.9, 70.3, 44.9, 39.7, 27.1. <b>HPLC:</b> Kromasil OD-H, Hexane:2-Propanol (98:2), 0.5 mL/min, 254 nm; retention time: 22.04 min, 30.87 min. <b>HRMS</b> (m/z) calculated: C<sub>35</sub>H<sub>33</sub>N<sub>2</sub>O<sub>3</sub> [M+ H]<sup>+</sup>: 529.2491, found: 529.2492.</p> |



|                                                                                                                            |                                                                                                                                                                                                                                                                                                                                                                                                                                                                                                                                                                                                                                                                                                                                                                                                                                                                                                                                                                                                                       |
|----------------------------------------------------------------------------------------------------------------------------|-----------------------------------------------------------------------------------------------------------------------------------------------------------------------------------------------------------------------------------------------------------------------------------------------------------------------------------------------------------------------------------------------------------------------------------------------------------------------------------------------------------------------------------------------------------------------------------------------------------------------------------------------------------------------------------------------------------------------------------------------------------------------------------------------------------------------------------------------------------------------------------------------------------------------------------------------------------------------------------------------------------------------|
| 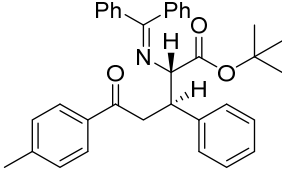 <p><b>3.10</b>, 71%, d.r. 98:2</p>       | <p>Following Procedure C using <math>\alpha,\beta</math>-unsaturated ketone <b>2.10</b> (22.3 mg, 0.102 mmol) as starting material, compound <b>3.10</b> was obtained as clear oil (37.5 mg, 71%).<sup>13</sup></p> <p><b><sup>1</sup>H NMR</b> (500 MHz, acetone) <math>\delta</math> 7.88 (d, <math>J</math> = 8.2 Hz, 2H), 7.68 (d, <math>J</math> = 8.6 Hz, 1H), 7.49 – 7.35 (m, 6H), 7.28 (d, <math>J</math> = 8.0 Hz, 2H), 7.21 – 7.09 (m, 5H), 6.92 – 6.84 (m, 2H), 4.25 – 4.17 (m, 2H), 3.75 – 3.67 (m, 1H), 3.61 – 3.53 (m, 1H), 2.37 (s, 3H), 1.28 (s, 9H). <b><sup>13</sup>C NMR</b> (126 MHz, acetone) <math>\delta</math> 198.4, 171.8, 170.5, 144.5, 142.9, 140.6, 137.4, 136.0, 131.4, 130.2, 129.8, 129.7, 129.6, 129.4, 129.2, 129.1, 128.9, 128.6, 127.5, 81.5, 72.2, 46.1, 41.0, 28.2, 21.7. <b>HPLC</b>: Kromasil OD-H, Hexane:2-Propanol (98:2), 0.5 mL/min, 254 nm; retention time: 12.48 min, 17.20 min.</p>                                                                                   |
|  <p><b>3.11</b>, 92%, d.r. 94:6</p>       | <p>Following Procedure C using <math>\alpha,\beta</math>-unsaturated ketone <b>2.11</b> (22.3 mg, 0.102 mmol) as starting material, compound <b>3.11</b> was obtained as clear oil (48 mg, 92%).<sup>13</sup></p> <p><b><sup>1</sup>H NMR</b> (400 MHz, Acetone) <math>\delta</math> 7.98 (d, <math>J</math> = 7.1 Hz, 2H), 7.68 (d, <math>J</math> = 8.6 Hz, 2H), 7.57 (t, <math>J</math> = 7.4 Hz, 1H), 7.51 – 7.35 (m, 8H), 7.06 (d, <math>J</math> = 8.1 Hz, 2H), 6.99 (d, <math>J</math> = 8.0 Hz, 2H), 6.92 – 6.84 (m, 2H), 4.26 – 4.11 (m, 2H), 3.78 – 3.65 (m, 1H), 3.60 (dd, <math>J</math> = 16.4, 3.2 Hz, 1H), 2.22 (s, 3H), 1.29 (s, 9H). <b><sup>13</sup>C NMR</b> (101 MHz, Acetone) <math>\delta</math> 198.9, 171.7, 170.5, 140.6, 139.8, 138.5, 137.4, 136.9, 133.7, 131.4, 129.63, 129.61, 129.6, 129.5, 129.5, 129.4, 129.1, 129.9, 128.6, 81.5, 72.2, 45.6, 41.2, 28.2, 21.1. <b>HPLC</b>: Kromasil OD-H, Hexane:2-Propanol (98:2), 0.5 mL/min, 254 nm; retention time: 10.62 min, 14.11 min.</p> |
|  <p><b>3.12</b>, 85%, d.r. &gt;99:1</p> | <p>Following Procedure C using <math>\alpha,\beta</math>-unsaturated ketone <b>2.12</b> (24 mg, 0.102 mmol) as starting material, compound <b>3.12</b> was obtained as clear oil (45 mg, 85%).<sup>13,15</sup></p> <p><b><sup>1</sup>H NMR</b> (400 MHz, Acetone) <math>\delta</math> 7.99 – 7.92 (m, 2H), 7.72 – 7.63 (m, 2H), 7.48 – 7.33 (m, 6H), 7.20 – 7.08 (m, 5H), 7.00 – 6.94 (m, 2H), 6.91 – 6.83 (m, 2H), 4.26 – 4.14 (m, 2H), 3.85 (s, 3H), 3.72 – 3.61 (m, 1H), 3.57 – 3.48 (m, 1H), 1.27 (s, 9H). <b><sup>13</sup>C NMR</b> (101 MHz, Acetone) <math>\delta</math> 196.2, 170.7, 169.4, 163.4, 141.9, 139.6, 136.4, 130.4, 130.3, 130.2, 128.7, 128.6, 128.5, 128.3, 128.0, 127.9, 127.6, 126.4, 113.6, 80.4, 71.1, 54.9, 45.1, 39.7, 27.1. <b>HPLC</b>: Kromasil OD-H, Hexane:2-Propanol (98:2), 0.5 mL/min, 254 nm; retention time: 20.67 min, 33.78 min.</p>                                                                                                                                          |
|  <p><b>3.113</b>, 88%, d.r. 98:2</p>    | <p>Following Procedure C using <math>\alpha,\beta</math>-unsaturated ketone <b>2.13</b> (24 mg, 0.102 mmol) as starting material, compound <b>3.12</b> was obtained as clear oil (47 mg, 88%).<sup>13,15</sup></p>                                                                                                                                                                                                                                                                                                                                                                                                                                                                                                                                                                                                                                                                                                                                                                                                    |

|                                                                                                                            |                                                                                                                                                                                                                                                                                                                                                                                                                                                                                                                                                                                                                                                                                                                                                                                                                                                                                                                                                                                                                                                                                                                                                       |
|----------------------------------------------------------------------------------------------------------------------------|-------------------------------------------------------------------------------------------------------------------------------------------------------------------------------------------------------------------------------------------------------------------------------------------------------------------------------------------------------------------------------------------------------------------------------------------------------------------------------------------------------------------------------------------------------------------------------------------------------------------------------------------------------------------------------------------------------------------------------------------------------------------------------------------------------------------------------------------------------------------------------------------------------------------------------------------------------------------------------------------------------------------------------------------------------------------------------------------------------------------------------------------------------|
|                                                                                                                            | <p><b><sup>1</sup>H NMR</b> (400 MHz, Acetone) <math>\delta</math> 7.97 (d, <math>J</math> = 7.4 Hz, 2H), 7.69 (d, <math>J</math> = 7.3 Hz, 2H), 7.57 (d, <math>J</math> = 8.0 Hz, 1H), 7.51 – 7.30 (m, 8H), 7.10 (d, <math>J</math> = 8.0 Hz, 2H), 6.99 – 6.86 (m, 2H), 6.74 (d, <math>J</math> = 7.9 Hz, 2H), 4.27 – 4.09 (m, 2H), 3.80 – 3.48 (m, 1H, c), 3.70 (s, 3H), 1.29 (s, 9H). <b><sup>13</sup>C NMR</b> (101 MHz, Acetone) <math>\delta</math> 199.0, 171.7, 170.6, 159.6, 140.7, 138.6, 137.5, 134.7, 133.8, 131.4, 130.8, 130.7, 129.7, 129.6, 129.4, 129.2, 129.0, 128.71, 114.4, 81.5, 72.4, 55.6, 45.4, 41.5, 28.3. <b>HPLC:</b> Kromasil OD-H, Hexane:2-Propanol (98:2), 0.5 mL/min, 254 nm; retention time: 15.67 min, 25.88 min.</p>                                                                                                                                                                                                                                                                                                                                                                                               |
| 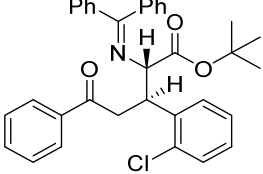 <p><b>3.14</b>, 89%, d.r. &gt;99:1</p>   | <p>Following Procedure C using <math>\alpha,\beta</math>-unsaturated ketone <b>2.14</b> (24.5 mg, 0.102 mmol) as starting material, compound <b>3.14</b> was obtained as clear oil (48 mg, 89%).<sup>13,14,15</sup></p> <p><b><sup>1</sup>H NMR</b> (500 MHz, acetone) <math>\delta</math> 8.04 (d, <math>J</math> = 8.4 Hz, 1H), 7.70 – 7.64 (m, 2H), 7.63 – 7.58 (m, 1H), 7.51 (dd, <math>J</math> = 10.5, 4.8 Hz, 2H), 7.47 – 7.29 (m, 8H), 7.17 (td, <math>J</math> = 7.7, 1.7 Hz, 1H), 7.12 (td, <math>J</math> = 7.5, 1.2 Hz, 1H), 6.61 (d, <math>J</math> = 6.6 Hz, 2H), 4.77 (dt, <math>J</math> = 10.0, 4.1 Hz, 1H), 4.30 (d, <math>J</math> = 4.3 Hz, 1H), 4.10 – 4.02 (m, 1H), 3.77 (dd, <math>J</math> = 17.4, 4.0 Hz, 1H), 1.36 (d, <math>J</math> = 13.5 Hz, 9H). <b><sup>13</sup>C NMR</b> (126 MHz, acetone) <math>\delta</math> 198.6, 172.1, 170.4, 140.4, 140.2, 138.3, 137.3, 135.3, 133.9, 131.4, 130.6, 130.5, 129.7, 129.6, 129.5, 129.3, 129.1, 129.0, 128.8, 128.3, 127.5, 81.9, 69.2, 41.6, 39.6, 28.3. <b>HPLC:</b> Kromasil OD-H, Hexane:2-Propanol (98:2), 0.5 mL/min, 254 nm; retention time: 11.95 min, 12.11 min.</p> |
|  <p><b>3.15</b>, 91%, d.r. &gt;99:1</p> | <p>Following Procedure C using <math>\alpha,\beta</math>-unsaturated ketone <b>2.15</b> (24.5 mg, 0.102 mmol) as starting material, compound <b>3.15</b> was obtained as clear oil (49 mg, 91%).<sup>14</sup></p> <p><b><sup>1</sup>H NMR</b> (500 MHz, acetone) <math>\delta</math> 8.00 (d, <math>J</math> = 7.2 Hz, 2H), 7.68 (d, <math>J</math> = 7.1 Hz, 2H), 7.59 (t, <math>J</math> = 7.4 Hz, 1H), 7.52 – 7.42 (m, 6H), 7.39 (t, <math>J</math> = 7.4 Hz, 2H), 7.27 (s, 1H), 7.24 – 7.15 (m, 3H), 6.93 (dd, <math>J</math> = 6.4, 2.9 Hz, 2H), 4.25 – 4.17 (m, 2H), 3.84 – 3.76 (m, 1H), 3.71 – 3.62 (m, 1H), 1.29 (s, 9H). <b><sup>13</sup>C NMR</b> (126 MHz, acetone) <math>\delta</math> 197.6, 171.1, 169.2, 144.4, 139.4, 137.2, 136.2, 133.3, 132.9, 130.4, 129.6, 128.9, 128.62, 128.58, 128.5, 128.4, 128.0, 127.9, 127.5, 127.1, 126.5, 80.73, 70.6, 44.7, 39.8, 27.1. <b>HPLC:</b> Kromasil OD-H, Hexane:2-Propanol (98:2), 0.5 mL/min, 254 nm; retention time: 10.96 min, 12.71 min.</p>                                                                                                                                           |
|  <p><b>3.16</b>, 88%, d.r. &gt;99:1</p> | <p>Following Procedure C using <math>\alpha,\beta</math>-unsaturated ketone <b>2.16</b> (23.8 mg, 0.102 mmol) as starting material, compound <b>3.16</b> was obtained as clear oil (48 mg, 88%).</p> <p><b><sup>1</sup>H NMR</b> (400 MHz, Acetone) <math>\delta</math> 7.98 (d, <math>J</math> = 7.3 Hz, 2H), 7.66 (d, <math>J</math> = 7.2 Hz, 2H), 7.58 (t, <math>J</math> = 7.3 Hz, 1H), 7.52 – 7.34 (m, 8H), 7.16 – 7.07 (m, 2H), 6.87 – 6.76 (m, 3H), 6.73 (t, <math>J</math> = 7.4 Hz, 1H), 4.57 – 4.49 (m, 1H), 4.45 (d, <math>J</math> = 6.0 Hz, 1H), 3.87 – 3.75 (m, 1H), 3.62 – 3.49 (m, 4H), 1.28 (s, 9H). <b><sup>13</sup>C NMR</b> (101 MHz, Acetone) <math>\delta</math> 198.2, 170.5, 169.9, 157.6, 139.6, 137.6, 136.6,</p>                                                                                                                                                                                                                                                                                                                                                                                                          |

|                                                                                                                            |                                                                                                                                                                                                                                                                                                                                                                                                                                                                                                                                                                                                                                                                                                                                                                                                                                                                                                                                                                                                                       |
|----------------------------------------------------------------------------------------------------------------------------|-----------------------------------------------------------------------------------------------------------------------------------------------------------------------------------------------------------------------------------------------------------------------------------------------------------------------------------------------------------------------------------------------------------------------------------------------------------------------------------------------------------------------------------------------------------------------------------------------------------------------------------------------------------------------------------------------------------------------------------------------------------------------------------------------------------------------------------------------------------------------------------------------------------------------------------------------------------------------------------------------------------------------|
|                                                                                                                            | 132.6, 130.2, 129.5, 129.3, 128.6, 128.4, 128.3, 128.2, 128.0, 127.9, 127.6, 127.5, 119.8, 110.9, 80.1, 68.3, 54.6, 39.7, 38.5, 27.1. <b>HPLC:</b> Kromasil OD-H, Hexane:2-Propanol (98:2), 0.5 mL/min, 254 nm; retention time: 17.31 min, 20.64 min. <b>HRMS</b> (m/z) calculated: C <sub>35</sub> H <sub>36</sub> NO <sub>4</sub> [M+H] <sup>+</sup> : 534.2644, found: 534.2636.                                                                                                                                                                                                                                                                                                                                                                                                                                                                                                                                                                                                                                   |
| 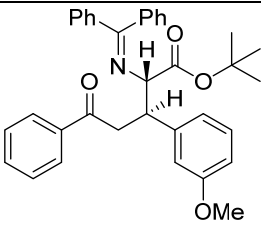 <p><b>3.17</b>, 90%, d.r. 98:2</p>       | <p>Following Procedure C using <math>\alpha,\beta</math>-unsaturated ketone <b>2.17</b> (23.8 mg, 0.102 mmol) as starting material, compound <b>3.17</b> was obtained as clear oil (48 mg, 90%).<sup>14</sup></p> <p><b><sup>1</sup>H NMR</b> (500 MHz, acetone) <math>\delta</math> 8.00 (d, <math>J</math> = 7.2 Hz, 1H), 7.70 (d, <math>J</math> = 7.1 Hz, 1H), 7.58 (t, <math>J</math> = 7.4 Hz, 1H), 7.52 – 7.35 (m, 4H), 7.09 (t, <math>J</math> = 8.1 Hz, 1H), 6.91 – 6.81 (m, 1H), 6.79 – 6.73 (m, 1H), 6.74 – 6.67 (m, 1H), 4.26 – 4.16 (m, 1H), 3.84 – 3.73 (m, 1H), 3.69 – 3.64 (m, 1H), 3.65 (s, 3H), 1.31 (s, 9H). <b><sup>13</sup>C NMR</b> (126 MHz, acetone) <math>\delta</math> 198.9, 171.7, 170.5, 160.6, 144.5, 140.6, 138.5, 137.4, 133.8, 131.4, 129.9, 129.7, 129.6, 129.6, 129.4, 129.1, 129.0, 128.6, 121.9, 115.5, 113.0, 81.6, 72.0, 55.5, 45.9, 40.9, 28.2. <b>HPLC:</b> Kromasil OD-H, Hexane:2-Propanol (98:2), 0.5 mL/min, 254 nm; retention time: 13.15 min, 16.18 min.</p>           |
|  <p><b>3.18</b>, 90%, d.r. 96:4</p>      | <p>Following Procedure C using <math>\alpha,\beta</math>-unsaturated ketone <b>2.18</b> (21.4 mg, 0.102 mmol) as starting material, compound <b>3.18</b> was obtained as clear oil (46 mg, 90%).</p> <p><b><sup>1</sup>H NMR</b> (400 MHz, Acetone) <math>\delta</math> 8.30 (s, 1H), 8.01 – 7.96 (m, 1H), 7.96 – 7.91 (m, 1H), 7.71 – 7.66 (m, 2H), 7.52 – 7.31 (m, 8H), 7.25 – 7.10 (m, 5H), 6.88 (dd, <math>J</math> = 7.0, 2.5 Hz, 2H), 4.31 – 4.18 (m, 2H), 3.86 – 3.78 (m, 1H), 3.72 – 3.63 (m, 1H), 1.29 (s, 9H). <b><sup>13</sup>C NMR</b> (101 MHz, Acetone) <math>\delta</math> 192.6, 170.9, 169.3, 144.1, 142.2, 141.6, 139.5, 136.3, 130.4, 129.7, 128.7, 128.6, 128.5, 128.4, 128.0, 127.6, 127.4, 126.6, 126.1, 124.9, 122.8, 80.6, 70.9, 45.2, 40.6, 27.1. <b>HPLC:</b> Kromasil OD-H, Hexane:2-Propanol (98:2), 0.5 mL/min, 254 nm; retention time: 18.81 min, 22.75 min. <b>HRMS</b> (m/z) calculated: C<sub>36</sub>H<sub>34</sub>NO<sub>3</sub>S [M+H]<sup>+</sup>: 560.2259, found: 560.2275</p> |
|  <p><b>3.19</b>, 91%, d.r. &gt;99:1</p> | <p>Following Procedure C using <math>\alpha,\beta</math>-unsaturated ketone <b>2.19</b> (19.82 mg, 0.102 mmol) as starting material, compound <b>3.19</b> was obtained as colorless solid (45 mg, 91%, mp 89.9 °C).<sup>12,13,14</sup></p> <p><b><sup>1</sup>H NMR</b> (500 MHz, acetone) <math>\delta</math> 7.77 – 7.72 (m, 1H), 7.70 – 7.64 (m, 2H), 7.48 – 7.41 (m, 4H), 7.38 (t, <math>J</math> = 7.4 Hz, 2H), 7.27 (d, <math>J</math> = 3.5 Hz, 1H), 7.22 – 7.10 (m, 5H), 6.91 – 6.82 (m, 2H), 6.58 (dd, <math>J</math> = 3.5, 1.7 Hz, 1H), 4.25 – 4.16 (m, 2H), 3.64 – 3.55 (m, 1H), 3.40 (dd, <math>J</math> = 16.3, 3.7 Hz, 1H), 1.29 (s, 9H). <b><sup>13</sup>C NMR</b> (126 MHz, acetone) <math>\delta</math> 186.6, 170.8, 169.3, 153.0, 146.6, 141.6, 139.5, 136.3, 130.4, 128.7, 128.6, 128.5, 128.34, 128.0, 127.9, 127.6, 126.5, 116.9, 112.1, 80.5, 71.0, 44.8, 39.9, 27.1. <b>HPLC:</b> Kromasil</p>                                                                                                |

|                                                                                                                           |                                                                                                                                                                                                                                                                                                                                                                                                                                                                                                                                                                                                                                                                                                                                                                                                                                                                                                                                                                                                                                                                                                                                                                                                                                                       |
|---------------------------------------------------------------------------------------------------------------------------|-------------------------------------------------------------------------------------------------------------------------------------------------------------------------------------------------------------------------------------------------------------------------------------------------------------------------------------------------------------------------------------------------------------------------------------------------------------------------------------------------------------------------------------------------------------------------------------------------------------------------------------------------------------------------------------------------------------------------------------------------------------------------------------------------------------------------------------------------------------------------------------------------------------------------------------------------------------------------------------------------------------------------------------------------------------------------------------------------------------------------------------------------------------------------------------------------------------------------------------------------------|
|                                                                                                                           | OD-H, Hexane:2-Propanol (98:2), 0.5 mL/min, 254 nm; retention time: 19.63 min, 26.06 min.                                                                                                                                                                                                                                                                                                                                                                                                                                                                                                                                                                                                                                                                                                                                                                                                                                                                                                                                                                                                                                                                                                                                                             |
| 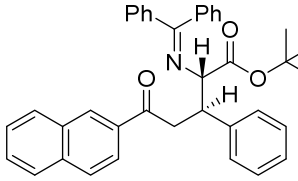 <p><b>3.20</b>, 87%, d.r. &gt;99:1</p>  | <p>Following Procedure C using <math>\alpha,\beta</math>-unsaturated ketone <b>2.20</b> (23.8 mg, 0.102 mmol) as starting material, compound <b>3.20</b> was obtained as clear oil (48 mg, 87%).</p> <p><b><math>^1\text{H NMR}</math></b> (400 MHz, Acetone) <math>\delta</math> 8.66 (s, 1H), 8.09 (d, <math>J = 8.0</math> Hz, 1H), 8.04 – 7.88 (m, 3H), 7.73 – 7.53 (m, 5H), 7.48 – 7.34 (m, 6H), 7.27 – 7.11 (m, 5H), 6.97 – 6.83 (m, 2H), 4.34 – 4.22 (m, 2H), 3.88 (dd, <math>J = 16.8, 9.0</math> Hz, 1H), 3.77 (dd, <math>J = 16.8, 4.1</math> Hz, 1H), 1.29 (s, 11H). <b><math>^{13}\text{C NMR}</math></b> (101 MHz, Acetone) <math>\delta</math> 198.9, 171.9, 170.5, 143.0, 140.7, 137.5, 136.6, 135.9, 133.8, 131.4, 130.8, 130.8, 130.7, 129.9, 129.7, 129.6, 129.4, 129.3, 129.1, 129.1, 128.8, 128.7, 127.8, 127.6, 124.9, 81.6, 72.2, 46.3, 41.3, 28.2. <b>HPLC</b>: Kromasil OD-H, Hexane:2-Propanol (98:2), 0.5 mL/min, 254 nm; retention time: 16.09 min, 17.96 min.</p>                                                                                                                                                                                                                                                         |
|  <p><b>3.21</b>, 83%, d.r. &gt;99:1</p> | <p>Following Procedure C using <math>\alpha,\beta</math>-unsaturated ketone <b>2.21</b> (23.8 mg, 0.102 mmol) as starting material, compound <b>3.21</b> was obtained as clear oil (46 mg, 83%).</p> <p><b><math>^1\text{H NMR}</math></b> (400 MHz, Acetone) <math>\delta</math> 8.17 (d, <math>J = 8.1</math> Hz, 1H), 8.04 (dd, <math>J = 8.3, 1.3</math> Hz, 2H), 7.88 (d, <math>J = 7.6</math> Hz, 1H), 7.74 (d, <math>J = 8.1</math> Hz, 1H), 7.69 – 7.63 (m, 2H), 7.59 (t, <math>J = 8.0</math> Hz, 1H), 7.52 – 7.33 (m, 9H), 7.33 – 7.25 (m, 2H), 7.21 (t, <math>J = 7.5</math> Hz, 1H), 7.08 (t, <math>J = 7.6</math> Hz, 2H), 6.41 (d, <math>J = 6.3</math> Hz, 2H), 5.30 – 5.14 (m, 1H), 4.34 (d, <math>J = 4.5</math> Hz, 1H), 4.14 (dd, <math>J = 17.4, 9.4</math> Hz, 1H), 3.86 (dd, <math>J = 17.4, 4.3</math> Hz, 1H), 1.30 (s, 9H). <b><math>^{13}\text{C NMR}</math></b> (101 MHz, Acetone) <math>\delta</math> 198.9, 171.8, 170.8, 140.5, 138.8, 138.5, 137.0, 135.2, 133.8, 133.0, 131.3, 129.7, 129.6, 129.6, 129.2, 129.0, 129.0, 128.9, 128.0, 128.0, 126.9, 126.4, 125.9, 124.2, 81.7, 70.6, 40.4, 28.2. <b>HPLC</b>: Kromasil OD-H, Hexane:2-Propanol (98:2), 0.5 mL/min, 254 nm; retention time: 13.28 min, 14.93 min.</p> |
|  <p><b>3.22</b>, 96%, d.r. 98:2</p>    | <p>Following Procedure C using <math>\alpha,\beta</math>-unsaturated ketone <b>2.22</b> (21.5 mg, 0.102 mmol) as starting material, compound <b>3.22</b> was obtained as clear oil (49 mg, 96%).</p> <p><b><math>^1\text{H NMR}</math></b> (500 MHz, acetone) <math>\delta</math> 7.52 (d, <math>J = 8.6</math> Hz, 1H), 7.33 – 7.21 (m, 1H), 7.09 – 6.97 (m, 5H), 6.70 (d, <math>J = 7.5</math> Hz, 1H), 3.97 (d, <math>J = 6.0</math> Hz, 1H), 3.90 – 3.85 (m, 1H), 3.06 (dd, <math>J = 17.1, 10.1</math> Hz, 1H), 2.91 (dd, <math>J = 17.1, 3.9</math> Hz, 1H), 2.21 (ddd, <math>J = 11.1, 7.3, 3.3</math> Hz, 1H), 1.63 – 1.39 (m, 6H), 1.15 (s, 9H), 1.12 – 1.03 (m, 2H), 1.02 – 0.87 (m, 2H). <b><math>^{13}\text{C NMR}</math></b> (126 MHz, acetone) <math>\delta</math> 210.5, 170.5, 169.4, 142.0, 139.5, 136.3, 130.3, 128.7, 128.5, 128.5, 128.3, 128.1, 127.9, 127.5, 126.4, 80.4, 70.9, 50.3, 44.3, 42.1, 28.1, 28.1, 27.2, 25.7, 25.4, 25.3. <b>HPLC</b>: Kromasil OD-H, Hexane:2-Propanol (98:2), 0.5 mL/min, 254 nm; retention time: 9.26 min, 13.36 min.</p>                                                                                                                                                                        |

|                                                                                                                       |                                                                                                                                                                                                                                                                                                                                                                                                                                                                                                                                                                                                                                                                                                                                                                                                                                                                                                                                                                                                                                                                                                                                                                                                        |
|-----------------------------------------------------------------------------------------------------------------------|--------------------------------------------------------------------------------------------------------------------------------------------------------------------------------------------------------------------------------------------------------------------------------------------------------------------------------------------------------------------------------------------------------------------------------------------------------------------------------------------------------------------------------------------------------------------------------------------------------------------------------------------------------------------------------------------------------------------------------------------------------------------------------------------------------------------------------------------------------------------------------------------------------------------------------------------------------------------------------------------------------------------------------------------------------------------------------------------------------------------------------------------------------------------------------------------------------|
|                                                                                                                       | <p><b>HRMS</b> (m/z) calculated: C<sub>34</sub>H<sub>40</sub>NO<sub>3</sub> [M+H]<sup>+</sup>: 510.3008, found: 510.3003</p>                                                                                                                                                                                                                                                                                                                                                                                                                                                                                                                                                                                                                                                                                                                                                                                                                                                                                                                                                                                                                                                                           |
| 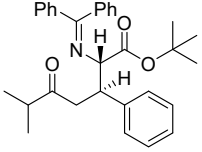 <p><b>3.23</b>, 70%, d.r. 98:2</p>  | <p>Following Procedure C using <math>\alpha,\beta</math>-unsaturated ketone <b>2.23</b> (23.8 mg, 0.102 mmol) as starting material, compound <b>3.22</b> was obtained as clear oil (34 mg, 70%).</p> <p><b><sup>1</sup>H NMR</b> (500 MHz, acetone) <math>\delta</math> 7.66 (d, <math>J</math> = 7.1 Hz, 2H), 7.52 – 7.32 (m, 6H), 7.26 – 7.08 (m, 5H), 6.85 (d, <math>J</math> = 7.4 Hz, 2H), 4.11 (d, <math>J</math> = 6.1 Hz, 1H), 4.01 (ddd, <math>J</math> = 10.1, 6.0, 4.0 Hz, 1H), 3.20 (dd, <math>J</math> = 17.1, 10.1 Hz, 1H), 3.06 (dd, <math>J</math> = 17.1, 3.9 Hz, 1H), 2.59 (dq, <math>J</math> = 13.8, 6.9 Hz, 1H), 1.28 (s, 9H), 0.95 (d, <math>J</math> = 6.9 Hz, 3H), 0.87 (d, <math>J</math> = 7.0 Hz, 3H). <b><sup>13</sup>C NMR</b> (126 MHz, acetone) <math>\delta</math> 211.3, 170.6, 169.3, 141.9, 139.5, 136.3, 130.4, 128.7, 128.5, 128.5, 128.3, 128.1, 127.9, 127.5, 126.4, 80.4, 70.9, 44.4, 41.9, 40.5, 27.1, 17.37, 17.35. <b>HPLC</b>: Kromasil OD-H, Hexane:2-Propanol (98:2), 0.5 mL/min, 254 nm; retention time: 8.99 min, 12.06 min. <b>HRMS</b> (m/z) calculated: C<sub>31</sub>H<sub>36</sub>NO<sub>3</sub> [M+H]<sup>+</sup>: 470.2695, found: 470.2699</p> |
|  <p><b>4.1</b>, 95%, d.r. 96:4</p>  | <p>Following Procedure D using <math>\alpha,\beta</math>-unsaturated ketone <b>2.1</b> (21 mg, 0.102 mmol) as starting material, compound <b>3.22</b> was obtained as clear oil (49 mg, 95%).</p> <p><b><sup>1</sup>H NMR</b> (400 MHz, Acetone) <math>\delta</math> 7.95 (d, <math>J</math> = 7.5 Hz, 2H), 7.73 (d, <math>J</math> = 7.3 Hz, 2H), 7.57 (d, <math>J</math> = 7.5 Hz, 1H), 7.48 – 7.31 (m, 6H), 7.27 (t, <math>J</math> = 7.3 Hz, 1H), 7.21 – 7.12 (m, 3H), 7.10 – 6.95 (m, 3H), 6.86 (dd, <math>J</math> = 6.7, 2.8 Hz, 2H), 5.42 (d, <math>J</math> = 4.8 Hz, 1H), 4.01 (d, <math>J</math> = 12.4 Hz, 1H), 3.93 – 3.82 (m, 1H), 3.71 (dd, <math>J</math> = 8.8, 4.8 Hz, 1H), 1.35 (s, 9H). <b><sup>13</sup>C NMR</b> (101 MHz, Acetone) <math>\delta</math> 203.4, 172.3, 147.6, 146.6, 142.3, 139.7, 134.0, 130.8, 129.8, 129.75, 129.5, 129.2, 129.1, 128.9, 128.0, 127.94, 127.91, 127.5, 127.2, 81.9, 78.4, 68.9, 64.5, 60.3, 28.3. <b>HPLC</b>: Kromasil OD-H, Hexane:2-Propanol (96:4), 0.5 mL/min, 254 nm; retention time: 10.21 min, 13.86 min. <b>HRMS</b> (m/z) calculated: C<sub>34</sub>H<sub>33</sub>NO<sub>3</sub>Na [M+Na]<sup>+</sup>: 526.2358, found: 526.2339.</p> |
|  <p><b>4.2</b>, 96%, d.r. 96:4</p> | <p>Following Procedure D using <math>\alpha,\beta</math>-unsaturated ketone <b>2.2</b> (24.5 mg, 0.102 mmol) as starting material, compound <b>4.2</b> was obtained as clear oil (52 mg, 96%).</p> <p><b><sup>1</sup>H NMR</b> (400 MHz, Acetone) <math>\delta</math> 7.94 (d, <math>J</math> = 7.4 Hz, 2H), 7.72 (d, <math>J</math> = 8.6 Hz, 2H), 7.45 – 7.31 (m, 7H), 7.26 (t, <math>J</math> = 7.3 Hz, 1H), 7.19 – 7.13 (m, 3H), 7.10 – 6.95 (m, 3H), 6.86 (dd, <math>J</math> = 6.4, 3.1 Hz, 2H), 5.38 (d, <math>J</math> = 4.7 Hz, 1H), 4.10 – 3.94 (m, 1H), 3.86 (dd, <math>J</math> = 13.3, 6.3 Hz, 1H), 3.73 (dd, <math>J</math> = 8.7, 4.7 Hz, 1H), 1.34 (s, 9H). <b><sup>13</sup>C NMR</b> (101 MHz, Acetone) <math>\delta</math> 201.2, 171.1, 146.3, 145.2, 141.1, 138.8, 137.1, 129.8, 128.8, 128.7, 128.4, 128.1, 127.9, 127.0, 126.9, 126.9, 126.5, 126.2, 80.8, 77.3, 67.7, 63.4, 58.9, 27.2. <b>HPLC</b>: Diacel IC (5<math>\mu</math>m), Hexane:2-Propanol (98:2), 0.5 mL/min, 254 nm; retention time: 17.86 min, 20.46 min. <b>HRMS</b> (m/z) calculated: C<sub>34</sub>H<sub>32</sub>ClNO<sub>3</sub>Na [M+Na]<sup>+</sup>: 560.1968, found: 560.1959.</p>                        |

|                                                                                                                        |                                                                                                                                                                                                                                                                                                                                                                                                                                                                                                                                                                                                                                                                                                                                                                                                                                                                                                                                                                                                                                                                                                                                                                                                  |
|------------------------------------------------------------------------------------------------------------------------|--------------------------------------------------------------------------------------------------------------------------------------------------------------------------------------------------------------------------------------------------------------------------------------------------------------------------------------------------------------------------------------------------------------------------------------------------------------------------------------------------------------------------------------------------------------------------------------------------------------------------------------------------------------------------------------------------------------------------------------------------------------------------------------------------------------------------------------------------------------------------------------------------------------------------------------------------------------------------------------------------------------------------------------------------------------------------------------------------------------------------------------------------------------------------------------------------|
| 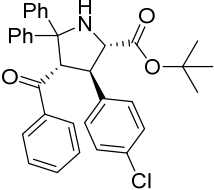 <p><b>4.3</b>, 92%, d.r. 90:10</p>   | <p>Following Procedure D using <math>\alpha,\beta</math>-unsaturated ketone <b>2.3</b> (24.5 mg, 0.102 mmol) as starting material, compound <b>4.3</b> was obtained as clear oil (50 mg, 92%).</p> <p><b><sup>1</sup>H NMR</b> (400 MHz, Acetone) <math>\delta</math> 7.93 (d, <math>J</math> = 7.5 Hz, 2H), 7.74 (d, <math>J</math> = 7.4 Hz, 2H), 7.57 (t, <math>J</math> = 7.4 Hz, 1H), 7.45 – 7.31 (m, 6H), 7.26 (t, <math>J</math> = 7.3 Hz, 1H), 7.20 – 7.13 (m, 2H), 7.09 – 6.95 (m, 3H), 6.85 (d, <math>J</math> = 8.4 Hz, 2H), 5.39 (d, <math>J</math> = 4.6 Hz, 1H), 4.01 (d, <math>J</math> = 11.8 Hz, 1H), 3.93 – 3.79 (m, 1H), 3.72 (dd, <math>J</math> = 8.5, 4.6 Hz, 1H), 1.36 (s, 9H). <b><sup>13</sup>C NMR</b> (101 MHz, Acetone) <math>\delta</math> 203.1, 172.0, 147.4, 146.3, 141.4, 139.6, 134.1, 133.2, 131.0, 130.8, 129.9, 129.8, 129.4, 129.2, 128.9, 128.1, 127.9, 127.5, 127.2, 82.1, 78.4, 68.7, 64.2, 59.0, 28.3. <b>HPLC</b>: Kromasil OD-H, Hexane:2-Propanol (98:2), 0.5 mL/min, 254 nm; retention time: 10.37 min, 15.74 min. <b>HRMS</b> (m/z) calculated: C<sub>34</sub>H<sub>32</sub>ClNO<sub>3</sub>Na [M+Na]<sup>+</sup>: 560.1968, found: 560.1956.</p> |
|  <p><b>4.4</b>, 76%, d.r. 90:10</p>   | <p>Following Procedure D using <math>\alpha,\beta</math>-unsaturated ketone <b>2.4</b> (29 mg, 0.102 mmol) as starting material, compound <b>4.4</b> was obtained as clear oil (44 mg, 76%).</p> <p><b><sup>1</sup>H NMR</b> (400 MHz, Acetone) <math>\delta</math> 7.93 (d, <math>J</math> = 8.2 Hz, 2H), 7.74 (d, <math>J</math> = 8.3 Hz, 2H), 7.57 (t, <math>J</math> = 7.4 Hz, 1H), 7.45 – 7.30 (m, 8H), 7.26 (t, <math>J</math> = 7.3 Hz, 1H), 7.08 – 6.96 (m, 3H), 6.79 (d, <math>J</math> = 8.5 Hz, 2H), 5.39 (d, <math>J</math> = 4.6 Hz, 1H), 4.02 (d, <math>J</math> = 11.9 Hz, 1H), 3.86 (dd, <math>J</math> = 11.9, 8.6 Hz, 1H), 3.71 (dd, <math>J</math> = 8.6, 4.5 Hz, 1H), 1.36 (s, 9H). <b><sup>13</sup>C NMR</b> (101 MHz, Acetone) <math>\delta</math> 202.0, 170.9, 146.3, 145.2, 140.8, 138.5, 133.0, 131.3, 130.2, 128.8, 128.7, 128.1, 127.8, 127.0, 126.9, 126.4, 126.2, 120.2, 81.0, 77.3, 67.6, 63.0, 57.9, 27.2. <b>HPLC</b>: Kromasil OD-H, Hexane:2-Propanol (98:2), 0.5 mL/min, 254 nm; retention time: 10.62 min, 16.37 min. <b>HRMS</b> (m/z) calculated: C<sub>34</sub>H<sub>32</sub>BrNO<sub>3</sub>Na [M+Na]<sup>+</sup>: 604.1463, found: 604.1452.</p>      |
|  <p><b>4.5</b>, 86%, d.r. 90:10</p> | <p>Following Procedure D using <math>\alpha,\beta</math>-unsaturated ketone <b>2.5</b> (29 mg, 0.102 mmol) as starting material, compound <b>4.5</b> was obtained as clear oil (50 mg, 86%).</p> <p><b><sup>1</sup>H NMR</b> (400 MHz, Acetone) <math>\delta</math> 7.95 (d, <math>J</math> = 8.1 Hz, 2H), 7.75 (d, <math>J</math> = 7.7 Hz, 2H), 7.57 (d, <math>J</math> = 7.6 Hz, 1H), 7.47 – 7.23 (m, 9H), 7.10 – 6.94 (m, 3H), 6.81 (d, <math>J</math> = 8.3 Hz, 2H), 5.40 (d, <math>J</math> = 4.5 Hz, 1H), 4.03 (d, <math>J</math> = 10.0 Hz, 1H), 3.87 (d, <math>J</math> = 7.0 Hz, 1H), 3.73 (dd, <math>J</math> = 8.4, 4.4 Hz, 1H), 1.37 (s, 9H). <b><sup>13</sup>C NMR</b> (101 MHz, Acetone) <math>\delta</math> 202.0, 170.9, 146.3, 145.2, 140.8, 138.5, 133.0, 131.3, 130.2, 128.8, 128.7, 128.1, 127.8, 127.0, 126.9, 126.4, 126.2, 120.2, 81.0, 77.3, 67.6, 63.0, 58.0, 27.3. <b>HPLC</b>: Kromasil OD-H, Hexane:2-Propanol (98:2), 0.5 mL/min, 254 nm; retention time: 10.68 min, 16.54 min. <b>HRMS</b> (m/z) calculated: C<sub>34</sub>H<sub>32</sub>BrNO<sub>3</sub>Na [M+ Na]<sup>+</sup>: 604.1463, found: 604.1456.</p>                                                   |

|                                                                                                                       |                                                                                                                                                                                                                                                                                                                                                                                                                                                                                                                                                                                                                                                                                                                                                                                                                                                                                                                                                                                                                                                                                                                                                                                                                                        |
|-----------------------------------------------------------------------------------------------------------------------|----------------------------------------------------------------------------------------------------------------------------------------------------------------------------------------------------------------------------------------------------------------------------------------------------------------------------------------------------------------------------------------------------------------------------------------------------------------------------------------------------------------------------------------------------------------------------------------------------------------------------------------------------------------------------------------------------------------------------------------------------------------------------------------------------------------------------------------------------------------------------------------------------------------------------------------------------------------------------------------------------------------------------------------------------------------------------------------------------------------------------------------------------------------------------------------------------------------------------------------|
| 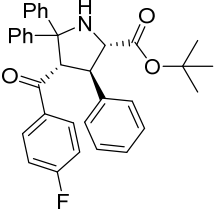 <p><b>4.6</b>, 96%, d.r. 96:4</p>   | <p>Following Procedure D using <math>\alpha,\beta</math>-unsaturated ketone <b>2.6</b> (22.6 mg, 0.102 mmol) as starting material, compound <b>4.6</b> was obtained as colorless solid (50 mg, 96%, mp 138.2 °C).</p> <p><b><sup>1</sup>H NMR</b> (400 MHz, Acetone) <math>\delta</math> 7.96 (d, <math>J</math> = 8.2 Hz, 2H), 7.86 – 7.78 (m, 2H), 7.42 – 7.30 (m, 4H), 7.27 (t, <math>J</math> = 7.3 Hz, 1H), 7.21 – 7.10 (m, 5H), 7.09 – 6.96 (m, 3H), 6.90 – 6.79 (m, 2H), 5.40 (d, <math>J</math> = 4.7 Hz, 1H), 4.00 (d, <math>J</math> = 11.6 Hz, 1H), 3.87 (t, <math>J</math> = 9.3 Hz, 1H), 3.78 – 3.66 (m, 1H), 1.35 (s, 9H). <b><sup>13</sup>C NMR</b> (101 MHz, Acetone) <math>\delta</math> 200.8, 171.2, 165.6 (d, <math>J</math> = 252.6 Hz), 146.4, 145.3, 141.2, 135.2, 131.0 (d, <math>J</math> = 9.4 Hz), 128.7, 128.4, 128.1, 127.8, 127.0, 126.9, 126.8, 126.4, 126.1, 115.54 (d, <math>J</math> = 22.1 Hz), 80.8, 77.3, 67.7, 63.3, 58.9, 27.2. <b>HPLC</b>: Diacel IC (5<math>\mu</math>m), Hexane:2-Propanol (98:2), 0.5 mL/min, 254 nm; retention time: 17.70 min, 20.61 min. <b>HRMS</b> (m/z) calculated: C<sub>34</sub>H<sub>32</sub>FNO<sub>3</sub>Na [M+Na]<sup>+</sup>: 544.2264, found: 544.2260.</p> |
|  <p><b>4.7</b>, 88%, d.r. 95:5</p>  | <p>Following Procedure D using <math>\alpha,\beta</math>-unsaturated ketone <b>2.7</b> (22.6 mg, 0.102 mmol) as starting material, compound <b>4.7</b> was obtained as colorless solid (46 mg, 88%, mp 126.2 °C).</p> <p><b><sup>1</sup>H NMR</b> (400 MHz, Acetone) <math>\delta</math> 7.95 (d, <math>J</math> = 7.3 Hz, 2H), 7.74 (d, <math>J</math> = 7.2 Hz, 2H), 7.58 (t, <math>J</math> = 7.4 Hz, 1H), 7.39 (dddd, <math>J</math> = 8.2, 6.1, 5.1, 1.4 Hz, 6H), 7.27 (t, <math>J</math> = 7.3 Hz, 1H), 7.14 – 6.97 (m, 3H), 6.97 – 6.82 (m, 4H), 5.40 (d, <math>J</math> = 4.7 Hz, 1H), 4.09 – 3.94 (m, 1H), 3.92 – 3.82 (m, 1H), 3.74 (dd, <math>J</math> = 8.7, 4.6 Hz, 1H), 1.37 (s, 9H). <b><sup>13</sup>C NMR</b> (101 MHz, Acetone) <math>\delta</math> 203.2, 172.1, 147.5, 146.5, 139.7, 138.5, 134.1, 131.1, 131.0, 129.9, 129.8, 129.5, 129.1, 128.9, 128.1, 127.9, 127.5, 127.2, 116.06 (d, <math>J</math> = 21.3 Hz), 101.1, 82.0, 78.3, 68.9, 64.4, 59.2, 28.3. <b>HPLC</b>: Kromasil OD-H, Hexane:2-Propanol (98:2), 0.5 mL/min, 254 nm; retention time: 10.59 min, 15.63 min. <b>HRMS</b> (m/z) calculated: C<sub>34</sub>H<sub>32</sub>FNO<sub>3</sub>Na [M+Na]<sup>+</sup>: 544.2264, found: 544.2252.</p>     |
|  <p><b>4.8</b>, 84%, d.r. 92:8</p> | <p>Following Procedure D using <math>\alpha,\beta</math>-unsaturated ketone <b>2.8</b> (28 mg, 0.102 mmol) as starting material, compound <b>4.8</b> was obtained as clear oil (48 mg, 84%).</p> <p><b><sup>1</sup>H NMR</b> (400 MHz, Acetone) <math>\delta</math> 7.96 (dd, <math>J</math> = 8.4, 1.0 Hz, 2H), 7.79 – 7.73 (m, 2H), 7.57 (dd, <math>J</math> = 11.7, 4.4 Hz, 1H), 7.51 (d, <math>J</math> = 8.1 Hz, 2H), 7.47 – 7.32 (m, 6H), 7.29 (dt, <math>J</math> = 9.0, 4.2 Hz, 1H), 7.13 – 6.97 (m, 5H), 5.46 (d, <math>J</math> = 4.5 Hz, 1H), 4.05 (d, <math>J</math> = 11.4 Hz, 1H), 3.94 (dt, <math>J</math> = 11.5, 5.7 Hz, 1H), 3.86 (dd, <math>J</math> = 8.7, 4.4 Hz, 1H), 1.37 (s, 9H). <b><sup>13</sup>C NMR</b> (101 MHz, Acetone) <math>\delta</math> 201.9, 170.8, 146.1, 146.0, 145.0, 138.5, 133.0, 128.9, 128.8, 128.7, 128.4, 128.1, 127.83, 127.1, 126.9, 126.5, 126.2, 125.2 (q, <math>J</math> = 3.9 Hz), 81.1, 77.3, 67.4, 62.8, 57.9, 27.2. <b>HPLC</b>: Kromasil OD-H, Hexane:2-Propanol (98:2), 0.5 mL/min, 254 nm; retention time: 9.71 min, 16.29 min. <b>HRMS</b> (m/z) calculated: C<sub>35</sub>H<sub>32</sub>F<sub>3</sub>NO<sub>3</sub>Na [M+Na]<sup>+</sup>: 594.2232, found: 594.2218.</p>   |

|                                                                                                                        |                                                                                                                                                                                                                                                                                                                                                                                                                                                                                                                                                                                                                                                                                                                                                                                                                                                                                                                                                                                                                                                                                                                                                                                                                                                                                             |
|------------------------------------------------------------------------------------------------------------------------|---------------------------------------------------------------------------------------------------------------------------------------------------------------------------------------------------------------------------------------------------------------------------------------------------------------------------------------------------------------------------------------------------------------------------------------------------------------------------------------------------------------------------------------------------------------------------------------------------------------------------------------------------------------------------------------------------------------------------------------------------------------------------------------------------------------------------------------------------------------------------------------------------------------------------------------------------------------------------------------------------------------------------------------------------------------------------------------------------------------------------------------------------------------------------------------------------------------------------------------------------------------------------------------------|
| 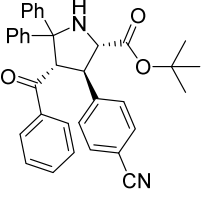 <p><b>4.9</b>, 70%, d.r. 75:25</p>   | <p>Following Procedure D using <math>\alpha,\beta</math>-unsaturated ketone <b>2.9</b> (23.3 mg, 0.102 mmol) as starting material, compound <b>4.9</b> was obtained as clear oil (38 mg, 70%).</p> <p><b><sup>1</sup>H NMR</b> (400 MHz, Acetone) <math>\delta</math> 7.93 (d, <math>J</math> = 7.5 Hz, 2H), 7.74 (d, <math>J</math> = 7.7 Hz, 2H), 7.68 (d, <math>J</math> = 8.4 Hz, 1H), 7.57 (d, <math>J</math> = 8.3 Hz, 3H), 7.39 (ddd, <math>J</math> = 27.1, 13.1, 8.5 Hz, 6H), 7.27 (t, <math>J</math> = 7.3 Hz, 1H), 7.09 (d, <math>J</math> = 8.3 Hz, 2H), 7.03 (d, <math>J</math> = 7.7 Hz, 2H), 5.44 (d, <math>J</math> = 4.5 Hz, 1H), 4.04 (dd, <math>J</math> = 9.3, 4.8 Hz, 1H), 3.93 (dd, <math>J</math> = 13.3, 6.4 Hz, 1H), 3.89 – 3.81 (m, 1H), 1.36 (s, 9H). <b><sup>13</sup>C NMR</b> (101 MHz, Acetone) <math>\delta</math> 201.7, 170.7, 146.9, 144.8, 133.1, 132.1, 131.7, 131.5, 130.7, 129.9, 129.3, 128.8, 128.7, 128.6, 128.1, 127.8, 126.9, 126.5, 126.3, 110.6, 81.2, 77.4, 67.3, 62.7, 57.9, 27.2. <b>HPLC</b>: Kromasil OD-H, Hexane:2-Propanol (98:2), 0.5 mL/min, 254 nm; retention time: 18.32 min, 29.84 min. <b>HRMS</b> (m/z) calculated: C<sub>35</sub>H<sub>32</sub>N<sub>2</sub>O<sub>3</sub>Na [M+Na]<sup>+</sup>: 551.2311, found: 551.2295.</p> |
|  <p><b>4.10</b>, 83%, d.r. 96:4</p>  | <p>Following Procedure D using <math>\alpha,\beta</math>-unsaturated ketone <b>2.10</b> (22.3 mg, 0.102 mmol) as starting material, compound <b>4.10</b> was obtained as colorless solid (44 mg, 83%, mp 150.4 °C).</p> <p><b><sup>1</sup>H NMR</b> (500 MHz, acetone) <math>\delta</math> 7.96 (d, <math>J</math> = 7.5 Hz, 2H), 7.67 (d, <math>J</math> = 8.2 Hz, 2H), 7.42 – 7.34 (m, 4H), 7.29 – 7.21 (m, 3H), 7.20 – 7.11 (m, 3H), 7.06 (t, <math>J</math> = 7.5 Hz, 2H), 6.99 (t, <math>J</math> = 7.3 Hz, 1H), 6.87 – 6.78 (m, 2H), 5.40 (d, <math>J</math> = 4.6 Hz, 1H), 4.10 – 3.98 (m, 1H), 3.88 (t, <math>J</math> = 8.4 Hz, 1H), 3.65 (dd, <math>J</math> = 8.7, 4.6 Hz, 1H), 2.37 (s, 3H), 1.35 (s, 9H). <b><sup>13</sup>C NMR</b> (126 MHz, acetone) <math>\delta</math> 202.9, 172.3, 147.7, 146.8, 144.9, 142.4, 137.2, 130.4, 129.8, 129.4, 129.3, 129.2, 128.9, 127.9, 127.8, 127.4, 127.1, 81.8, 78.4, 68.9, 64.2, 60.6, 28.3, 21.7. <b>HPLC</b>: Kromasil OD-H, Hexane:2-Propanol (98:2), 0.5 mL/min, 254 nm; retention time: 10.56 min, 11.42 min. <b>HRMS</b> (m/z) calculated: C<sub>35</sub>H<sub>36</sub>NO<sub>3</sub> [M+H]<sup>+</sup>: 518.2695, found: 518.2692</p>                                                                                          |
|  <p><b>4.11</b>, 90%, d.r. 94:6</p> | <p>Following Procedure D using <math>\alpha,\beta</math>-unsaturated ketone <b>2.11</b> (22.3 mg, 0.102 mmol) as starting material, compound <b>4.11</b> was obtained as clear oil (47 mg, 90%).</p> <p><b><sup>1</sup>H NMR</b> (400 MHz, Acetone) <math>\delta</math> 7.94 (d, <math>J</math> = 7.4 Hz, 2H), 7.74 (d, <math>J</math> = 7.2 Hz, 2H), 7.58 (t, <math>J</math> = 7.4 Hz, 1H), 7.46 – 7.33 (m, 6H), 7.26 (t, <math>J</math> = 7.3 Hz, 1H), 7.06 (t, <math>J</math> = 7.3 Hz, 2H), 6.99 (dd, <math>J</math> = 14.0, 7.5 Hz, 3H), 6.72 (d, <math>J</math> = 7.9 Hz, 2H), 5.39 (d, <math>J</math> = 4.6 Hz, 1H), 4.11 – 3.94 (m, 1H), 3.91 – 3.78 (m, 1H), 3.67 (dd, <math>J</math> = 8.6, 4.5 Hz, 1H), 2.24 (s, 3H), 1.36 (s, 9H). <b><sup>13</sup>C NMR</b> (101 MHz, Acetone) <math>\delta</math> 203.4, 172.2, 147.5, 146.6, 139.6, 139.2, 137.2, 133.9, 129.9, 129.65, 129.6, 128.95, 128.9, 128.8, 127.8, 127.8, 127.3, 127.0, 81.7, 78.2, 68.8, 64.4, 59.8, 28.2, 21.0. <b>HPLC</b>: Kromasil OD-H, Hexane:2-Propanol (98:2), 0.5 mL/min, 254 nm; retention time: 9.77 min, 13.64 min. <b>HRMS</b> (m/z) calculated: C<sub>35</sub>H<sub>35</sub>NO<sub>3</sub>Na [M+Na]<sup>+</sup>: 540.2515, found: 540.2507.</p>                                                      |



|                                                                                                                            |                                                                                                                                                                                                                                                                                                                                                                                                                                                                                                                                                                                                                                                                                                                                                                                                                                                                                                                                                                                                                                                                                                                                                                                                                                                    |
|----------------------------------------------------------------------------------------------------------------------------|----------------------------------------------------------------------------------------------------------------------------------------------------------------------------------------------------------------------------------------------------------------------------------------------------------------------------------------------------------------------------------------------------------------------------------------------------------------------------------------------------------------------------------------------------------------------------------------------------------------------------------------------------------------------------------------------------------------------------------------------------------------------------------------------------------------------------------------------------------------------------------------------------------------------------------------------------------------------------------------------------------------------------------------------------------------------------------------------------------------------------------------------------------------------------------------------------------------------------------------------------|
| 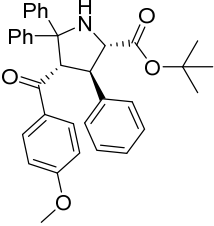 <p><b>4.12</b>, 92%, d.r. 95:5</p>       | <p>Following Procedure D using <math>\alpha,\beta</math>-unsaturated ketone <b>2.12</b> (24 mg, 0.102 mmol) as starting material, compound <b>4.12</b> was obtained as colorless solid (50 mg, 92%, 147.9 °C).</p> <p><b><sup>1</sup>H NMR</b> (400 MHz, Acetone) <math>\delta</math> 7.96 (d, <math>J</math> = 7.4 Hz, 2H), 7.77 (d, <math>J</math> = 8.9 Hz, 2H), 7.42 – 7.30 (m, 4H), 7.26 (t, <math>J</math> = 7.3 Hz, 1H), 7.19 – 7.11 (m, 3H), 7.09 – 7.02 (m, 2H), 7.01 – 6.91 (m, 3H), 6.85 – 6.76 (m, 2H), 5.36 (d, <math>J</math> = 4.6 Hz, 1H), 4.02 (d, <math>J</math> = 12.3 Hz, 1H), 3.91 – 3.78 (m, 1H, covered), 3.87 (s, 3H), 3.63 (dd, <math>J</math> = 8.7, 4.6 Hz, 1H), 1.34 (s, 9H). <b><sup>13</sup>C NMR</b> (101 MHz, Acetone) <math>\delta</math> 201.6, 172.3, 164.8, 147.8, 146.9, 142.5, 132.5, 131.5, 129.8, 129.4, 129.1, 128.83, 127.87, 127.85, 127.8, 127.3, 127.0, 114.9, 81.8, 78.3, 68.9, 63.9, 60.6, 56.1, 28.3. <b>HPLC</b>: Diacel IC (5<math>\mu</math>m), Hexane:2-Propanol (95:5), 1 mL/min, 254 nm; retention time: 22.09 min, 27.45 min. <b>HRMS</b> (m/z) calculated: C<sub>35</sub>H<sub>35</sub>NO<sub>4</sub>Na [M+Na]<sup>+</sup>: 556.2464, found: 556.2462.</p>                                 |
|  <p><b>4.13</b>, 85%, d.r. &gt;99:1</p>  | <p>Following Procedure D using <math>\alpha,\beta</math>-unsaturated ketone <b>2.13</b> (24 mg, 0.102 mmol) as starting material, compound <b>4.11</b> was obtained as clear oil (48 mg, 85%).</p> <p><b><sup>1</sup>H NMR</b> (400 MHz, Acetone) <math>\delta</math> 7.95 (d, <math>J</math> = 7.4 Hz, 2H), 7.74 (d, <math>J</math> = 7.1 Hz, 2H), 7.62 – 7.55 (m, 1H), 7.47 – 7.31 (m, 6H), 7.26 (t, <math>J</math> = 7.3 Hz, 1H), 7.12 – 6.95 (m, 3H), 6.73 (q, <math>J</math> = 9.0 Hz, 4H), 5.37 (d, <math>J</math> = 4.6 Hz, 1H), 3.82 (d, <math>J</math> = 8.7 Hz, 1H), 3.73 (s, 3H), 3.64 (dd, <math>J</math> = 8.8, 4.6 Hz, 1H), 1.33 (s, 9H). <b><sup>13</sup>C NMR</b> (101 MHz, Acetone) <math>\delta</math> 202.4, 171.3, 158.7, 146.6, 145.7, 138.6, 133.2, 132.9, 129.1, 128.7, 128.7, 128.0, 127.8, 126.9, 126.8, 126.3, 126.0, 113.7, 80.7, 77.2, 67.9, 63.6, 58.7, 54.5, 27.2. <b>HPLC</b>: Kromasil OD-H, Hexane:2-Propanol (98:2), 0.5 mL/min, 254 nm; retention time: 12.62 min, 20.11 min. <b>HRMS</b> (m/z) calculated: C<sub>35</sub>H<sub>35</sub>NO<sub>4</sub>Na [M+ Na]<sup>+</sup>: 556.2464, found: 556.2454.</p>                                                                                                    |
|  <p><b>4.14</b>, 87%, d.r. &gt;99:1</p> | <p>Following Procedure D using <math>\alpha,\beta</math>-unsaturated ketone <b>2.14</b> (24.5 mg, 0.102 mmol) as starting material, compound <b>4.14</b> was obtained as colorless solid (47 mg, 87%, mp 84.2 °C).</p> <p><b><sup>1</sup>H NMR</b> (400 MHz, Acetone) <math>\delta</math> 7.93 (d, <math>J</math> = 7.4 Hz, 2H), 7.77 (d, <math>J</math> = 7.3 Hz, 2H), 7.56 (t, <math>J</math> = 7.4 Hz, 1H), 7.45 – 7.24 (m, 8H), 7.19 (td, <math>J</math> = 7.7, 1.5 Hz, 1H), 7.08 – 6.92 (m, 4H), 6.49 (d, <math>J</math> = 8.0 Hz, 1H), 5.33 (d, <math>J</math> = 4.0 Hz, 1H), 4.37 (dd, <math>J</math> = 8.6, 4.0 Hz, 1H), 4.10 (d, <math>J</math> = 12.3 Hz, 1H), 3.97 (dd, <math>J</math> = 12.2, 8.6 Hz, 1H), 1.34 (s, 9H). <b><sup>13</sup>C NMR</b> (101 MHz, Acetone) <math>\delta</math> 203.7, 171.8, 147.2, 145.4, 140.0, 139.7, 135.1, 133.9, 130.1, 129.8, 129.6, 129.5, 129.2, 129.1, 128.8, 128.2, 128.1, 128.0, 127.3, 127.2, 81.9, 78.6, 67.4, 63.3, 55.0, 28.1. <b>HPLC</b>: Diacel IC (5<math>\mu</math>m), Hexane:2-Propanol (98:2), 0.5 mL/min, 254 nm; retention time: 9.93 min, 10.99 min. <b>HRMS</b> (m/z) calculated: C<sub>34</sub>H<sub>33</sub>ClNO<sub>3</sub> [M+H]<sup>+</sup>: 538.2149, found: 538.2143.</p> |

|                                                                                                                         |                                                                                                                                                                                                                                                                                                                                                                                                                                                                                                                                                                                                                                                                                                                                                                                                                                                                                                                                                                                                                                                                                                                                                                                                                                                                                                                                                    |
|-------------------------------------------------------------------------------------------------------------------------|----------------------------------------------------------------------------------------------------------------------------------------------------------------------------------------------------------------------------------------------------------------------------------------------------------------------------------------------------------------------------------------------------------------------------------------------------------------------------------------------------------------------------------------------------------------------------------------------------------------------------------------------------------------------------------------------------------------------------------------------------------------------------------------------------------------------------------------------------------------------------------------------------------------------------------------------------------------------------------------------------------------------------------------------------------------------------------------------------------------------------------------------------------------------------------------------------------------------------------------------------------------------------------------------------------------------------------------------------|
| 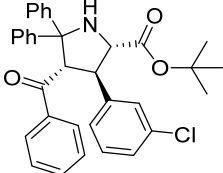 <p><b>4.15</b>, 87%, d.r. 93:7</p>    | <p>Following Procedure D using <math>\alpha,\beta</math>-unsaturated ketone <b>2.15</b> (24.5 mg, 0.102 mmol) as starting material, compound <b>4.15</b> was obtained as colorless solid (47 mg, 87%, mp 112.9 °C).</p> <p><b><sup>1</sup>H NMR</b> (500 MHz, acetone) <math>\delta</math> 7.98 (d, <math>J</math> = 7.8 Hz, 2H), 7.78 (d, <math>J</math> = 7.5 Hz, 2H), 7.59 (t, <math>J</math> = 7.4 Hz, 1H), 7.48 – 7.34 (m, 6H), 7.28 (t, <math>J</math> = 7.3 Hz, 1H), 7.24 – 7.16 (m, 2H), 7.06 (t, <math>J</math> = 7.5 Hz, 2H), 7.00 (t, <math>J</math> = 7.3 Hz, 1H), 6.87 (d, <math>J</math> = 6.8 Hz, 1H), 6.78 (d, <math>J</math> = 0.8 Hz, 1H), 5.43 (d, <math>J</math> = 4.3 Hz, 1H), 4.09 – 3.99 (m, 1H), 3.90 – 3.83 (m, 1H), 3.71 (dd, <math>J</math> = 8.5, 4.2 Hz, 1H), 1.38 (s, 9H). <b><sup>13</sup>C NMR</b> (126 MHz, acetone) <math>\delta</math> 202.8, 171.7, 147.0, 146.1, 144.7, 139.2, 134.6, 133.9, 130.7, 129.6, 129.5, 128.9, 128.9, 128.7, 127.9, 127.7, 127.7, 127.6, 127.2, 126.9, 81.8, 78.3, 68.7, 63.7, 59.0, 28.0. <b>HPLC</b>: Kromasil OD-H, Hexane:2-Propanol (98:2), 0.5 mL/min, 254 nm; retention time: 9.98 min, 13.17 min. <b>HRMS</b> (m/z) calculated: C<sub>34</sub>H<sub>33</sub>ClNO<sub>3</sub> [M+H]<sup>+</sup>: 538.2149, found: 538.2137.</p>                                              |
|  <p><b>4.16</b>, 87%, d.r. 98:2</p>    | <p>Following Procedure D using <math>\alpha,\beta</math>-unsaturated ketone <b>2.16</b> (23.8 mg, 0.102 mmol) compound <b>4.16</b> was obtained as clear oil (46 mg, 87%).</p> <p><b><sup>1</sup>H NMR</b> (500 MHz, acetone) <math>\delta</math> 7.78 (dd, <math>J</math> = 19.2, 7.3 Hz, 4H), 7.56 (t, <math>J</math> = 7.4 Hz, 1H), 7.43 (t, <math>J</math> = 7.7 Hz, 2H), 7.35 – 7.24 (m, 4H), 7.19 (ddd, <math>J</math> = 17.2, 11.4, 4.5 Hz, 2H), 7.03 – 6.92 (m, 3H), 6.89 (d, <math>J</math> = 8.1 Hz, 1H), 6.73 – 6.67 (m, 1H), 6.63 (dd, <math>J</math> = 7.6, 1.3 Hz, 1H), 5.30 (d, <math>J</math> = 4.5 Hz, 1H), 4.14 (dd, <math>J</math> = 8.6, 4.5 Hz, 1H), 4.01 (d, <math>J</math> = 8.4 Hz, 1H), 3.38 (s, 3H), 1.33 (s, 9H). <b><sup>13</sup>C NMR</b> (126 MHz, acetone) <math>\delta</math> 202.9, 171.4, 157.1, 146.5, 144.9, 138.9, 132.5, 129.0, 128.39, 128.38, 128.0, 127.7, 127.6, 127.3, 126.8, 126.7, 126.4, 125.9, 120.0, 110.1, 80.5, 76.7, 63.8, 61.5, 54.3, 51.7, 27.2. <b>HPLC</b>: Kromasil OD-H, Hexane:2-Propanol (98:2), 0.5 mL/min, 254 nm; retention time: 12.00 min, 17.33 min. <b>HRMS</b> (m/z) calculated: C<sub>35</sub>H<sub>36</sub>NO<sub>4</sub> [M+H]<sup>+</sup>: 534.2644, found: 534.2644.</p>                                                                                                   |
|  <p><b>4.17</b>, 84%, d.r. 85:15</p> | <p>Following Procedure D using <math>\alpha,\beta</math>-unsaturated ketone <b>2.17</b> (23.8 mg, 0.102 mmol) as starting material, compound <b>4.17</b> was obtained as colorless solid (44.5 mg, 84%, mp 107.8 °C).</p> <p><b><sup>1</sup>H NMR</b> (400 MHz, Acetone) <math>\delta</math> 7.99 (d, <math>J</math> = 7.4 Hz, 2H), 7.75 (d, <math>J</math> = 8.5 Hz, 1H), 7.59 (t, <math>J</math> = 7.4 Hz, 1H), 7.51 – 7.31 (m, 6H), 7.25 (t, <math>J</math> = 7.3 Hz, 1H), 7.07 (dd, <math>J</math> = 15.4, 7.9 Hz, 3H), 6.99 (t, <math>J</math> = 7.2 Hz, 1H), 6.73 (dd, <math>J</math> = 8.1, 2.2 Hz, 1H), 6.49 (d, <math>J</math> = 7.6 Hz, 1H), 6.43 – 6.33 (m, 1H), 5.44 (d, <math>J</math> = 4.5 Hz, 1H), 4.02 (s, 1H), 3.87 (d, <math>J</math> = 8.8 Hz, 1H), 3.66 (dd, <math>J</math> = 8.7, 4.4 Hz, 1H), 3.54 (s, 3H), 1.37 (s, 9H). <b><sup>13</sup>C NMR</b> (101 MHz, Acetone) <math>\delta</math> 202.5, 171.1, 160.0, 146.6, 145.7, 142.9, 138.6, 132.9, 129.2, 128.9, 128.7, 128.1, 127.9, 126.9, 126.8, 126.3, 126.0, 120.8, 113.2, 112.4, 80.8, 77.4, 68.0, 63.3, 59.6, 54.5, 27.2. <b>HPLC</b>: Kromasil OD-H, Hexane:2-Propanol (98:2), 0.5 mL/min, 254 nm; retention time: 11.83 min, 16.85 min. <b>HRMS</b> (m/z) calculated: C<sub>35</sub>H<sub>36</sub>NO<sub>4</sub> [M+H]<sup>+</sup>: 534.2644, found: 534.2637.</p> |

|                                                                                                                           |                                                                                                                                                                                                                                                                                                                                                                                                                                                                                                                                                                                                                                                                                                                                                                                                                                                                                                                                                                                                                                                                                                                                                                                                                                                                                                                                                                                      |
|---------------------------------------------------------------------------------------------------------------------------|--------------------------------------------------------------------------------------------------------------------------------------------------------------------------------------------------------------------------------------------------------------------------------------------------------------------------------------------------------------------------------------------------------------------------------------------------------------------------------------------------------------------------------------------------------------------------------------------------------------------------------------------------------------------------------------------------------------------------------------------------------------------------------------------------------------------------------------------------------------------------------------------------------------------------------------------------------------------------------------------------------------------------------------------------------------------------------------------------------------------------------------------------------------------------------------------------------------------------------------------------------------------------------------------------------------------------------------------------------------------------------------|
| 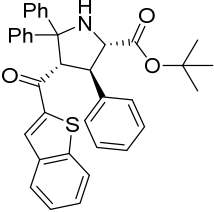 <p><b>4.18</b>, 78%, d.r. 95:5</p>      | <p>Following Procedure D using <math>\alpha,\beta</math>-unsaturated ketone <b>2.18</b> (21.4 mg, 0.102 mmol) as starting material, compound <b>4.18</b> was obtained as colorless solid (40 mg, 78%, mp 171.2 °C).</p> <p><b><sup>1</sup>H NMR</b> (600 MHz, acetone) <math>\delta</math> 8.32 (d, <math>J</math> = 2.1 Hz, 1H), 8.02 (d, <math>J</math> = 7.6 Hz, 2H), 7.95 (dd, <math>J</math> = 8.2, 1.7 Hz, 2H), 7.50 (dd, <math>J</math> = 16.4, 7.6 Hz, 3H), 7.42 (dt, <math>J</math> = 15.6, 7.5 Hz, 3H), 7.28 (t, <math>J</math> = 7.3 Hz, 1H), 7.19 – 7.12 (m, 3H), 7.06 (t, <math>J</math> = 7.7 Hz, 2H), 6.99 (t, <math>J</math> = 7.3 Hz, 1H), 6.86 (d, <math>J</math> = 7.7 Hz, 2H), 5.42 (d, <math>J</math> = 4.5 Hz, 1H), 4.01 (d, <math>J</math> = 12.1 Hz, 1H), 3.92 – 3.85 (m, 1H), 3.74 (dd, <math>J</math> = 8.7, 4.4 Hz, 1H), 1.34 (s, 9H). <b><sup>13</sup>C NMR</b> (151 MHz, acetone) <math>\delta</math> 196.3, 171.0, 146.3, 145.4, 145.3, 142.8, 141.2, 139.4, 130.1, 128.8, 128.3, 128.1, 127.9, 127.7, 126.9, 126.8, 126.8, 126.4, 126.2, 125.1, 122.9, 80.9, 77.3, 67.6, 64.6, 59.4, 27.2. <b>HPLC</b> Diacel IC (5<math>\mu</math>m), Hexane:2-Propanol (98:2), 0.5 mL/min, 254 nm; retention time: 24.57 min, 31.53 min. <b>HRMS</b> (m/z) calculated: C<sub>36</sub>H<sub>34</sub>NO<sub>3</sub>S [M+H]<sup>+</sup>: 560.2259, found: 560.2272</p> |
|  <p><b>4.19</b>, 69%, d.r. &gt;99:1</p> | <p>Following Procedure D using <math>\alpha,\beta</math>-unsaturated ketone <b>2.19</b> (19.82 mg, 0.102 mmol) as starting material, compound <b>4.19</b> was obtained as colorless solid (34 mg, 69%, mp 121.5 °C).</p> <p><b><sup>1</sup>H NMR</b> (500 MHz, acetone) <math>\delta</math> 7.99 (d, <math>J</math> = 7.6 Hz, 2H), 7.80 (d, <math>J</math> = 0.9 Hz, 1H), 7.42 (t, <math>J</math> = 7.8 Hz, 2H), 7.37 (d, <math>J</math> = 7.5 Hz, 2H), 7.29 (t, <math>J</math> = 7.3 Hz, 1H), 7.23 – 7.11 (m, 4H), 7.07 (t, <math>J</math> = 7.6 Hz, 2H), 7.00 (t, <math>J</math> = 7.3 Hz, 1H), 6.88 (dd, <math>J</math> = 6.5, 2.8 Hz, 2H), 6.58 (dd, <math>J</math> = 3.6, 1.6 Hz, 1H), 5.21 (d, <math>J</math> = 4.3 Hz, 1H), 3.91 (s, 1H), 3.86 – 3.73 (m, 2H), 1.35 (s, 9H). <b><sup>13</sup>C NMR</b> (126 MHz, acetone) <math>\delta</math> 192.5, 173.8, 156.2, 149.9, 149.0, 147.3, 144.00, 131.4, 130.9, 130.7, 130.4, 129.7, 129.6, 129.4, 128.88, 128.86, 120.2, 115.4, 83.5, 79.6, 69.9, 66.6, 60.7, 29.9. <b>HPLC</b>: Kromasil OD-H, Hexane:2-Propanol (98:2), 0.5 mL/min, 254 nm; retention time: 14.52 min, 16.13 min. <b>HRMS</b> (m/z) calculated: C<sub>32</sub>H<sub>32</sub>NO<sub>4</sub> [M+H]<sup>+</sup>: 494.2331, found: 494.2321.</p>                                                                                                                 |
|  <p><b>4.20</b>, 96%, d.r. 99:1</p>    | <p>Following Procedure D using <math>\alpha,\beta</math>-unsaturated ketone <b>2.20</b> (23.8 mg, 0.102 mmol) compound <b>4.20</b> was obtained as clear oil (53 mg, 96%).</p> <p><b><sup>1</sup>H NMR</b> (400 MHz, Acetone) <math>\delta</math> 8.41 (s, 1H), 8.04 – 7.99 (m, 2H), 7.90 (dd, <math>J</math> = 16.4, 8.5 Hz, 3H), 7.73 (dd, <math>J</math> = 8.7, 1.7 Hz, 1H), 7.65 – 7.59 (m, 1H), 7.57 – 7.52 (m, 1H), 7.43 – 7.36 (m, 4H), 7.26 (t, <math>J</math> = 7.3 Hz, 1H), 7.17 (dd, <math>J</math> = 5.0, 1.9 Hz, 3H), 7.05 – 6.95 (m, 3H), 6.91 (dd, <math>J</math> = 6.4, 3.1 Hz, 2H), 5.60 (d, <math>J</math> = 4.8 Hz, 1H), 3.95 (d, <math>J</math> = 8.7 Hz, 1H), 3.79 (dd, <math>J</math> = 8.7, 4.8 Hz, 1H), 1.35 (s, 9H). <b><sup>13</sup>C NMR</b> (101 MHz, Acetone) <math>\delta</math> 202.0, 171.2, 146.6, 145.6, 141.3, 135.9, 135.5, 132.6, 129.8, 129.6, 128.8, 128.6, 128.5, 128.4, 128.2, 127.9, 127.7, 126.9, 126.9, 126.9, 126.8, 126.5, 126.1, 123.9, 80.8, 77.3, 67.8, 63.6, 59.2, 27.3. <b>HPLC</b>: Diacel IC (5<math>\mu</math>m), Hexane:2-Propanol (98:2), 0.5 mL/min, 254 nm; retention time: 34.07 min, 36.73 min. <b>HRMS</b> (m/z) calculated: C<sub>38</sub>H<sub>35</sub>NO<sub>3</sub>Na [M+Na]<sup>+</sup>: 576.2515, found: 576.2512.</p>                                                                                            |

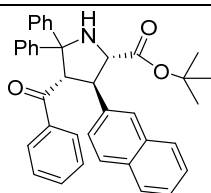

**4.21**, 99%, d.r. >99:1

Following Procedure D using  $\alpha,\beta$ -unsaturated ketone **2.21** (23.8 mg, 0.102 mmol) compound **4.21** was obtained as clear oil (55 mg, 99%).

**$^1\text{H NMR}$**  (400 MHz, Acetone)  $\delta$  7.93 (d,  $J$  = 7.3 Hz, 2H), 7.87 (d,  $J$  = 7.6 Hz, 1H), 7.81 (d,  $J$  = 8.7 Hz, 1H), 7.75 (d,  $J$  = 8.2 Hz, 1H), 7.62 (dd,  $J$  = 8.3, 1.2 Hz, 2H), 7.49 – 7.36 (m, 4H), 7.33 – 7.22 (m, 1H), 7.04 – 6.94 (m, 3H), 6.90 (d,  $J$  = 6.7 Hz, 1H), 5.46 (d,  $J$  = 4.9 Hz, 1H), 4.85 – 4.72 (m, 1H), 4.11 (d,  $J$  = 7.1 Hz, 2H), 1.13 (s, 9H).  **$^{13}\text{C NMR}$**  (101 MHz, Acetone)  $\delta$  204.0, 172.3, 147.4, 145.4, 139.9, 138.5, 134.9, 133.8, 133.2, 129.9, 129.7, 129.5, 129.0, 128.7, 128.3, 128.2, 128.1, 127.7, 127.3, 127.0, 126.5, 126.4, 125.5, 124.0, 81.7, 78.6, 68.4, 64.8, 53.2, 28.0. **HPLC**: Kromasil OD-H, Hexane:2-Propanol (98:2), 0.5 mL/min, 254 nm; retention time: 11.06 min, 11.58 min. **HRMS** ( $m/z$ ) calculated:  $\text{C}_{38}\text{H}_{35}\text{NO}_3\text{Na}$  [ $\text{M} + \text{Na}$ ] $^+$ : 576.2515, found: 576.2494.

### 3. Copies of $^1\text{H}$ and $^{13}\text{C}$ NMR spectra

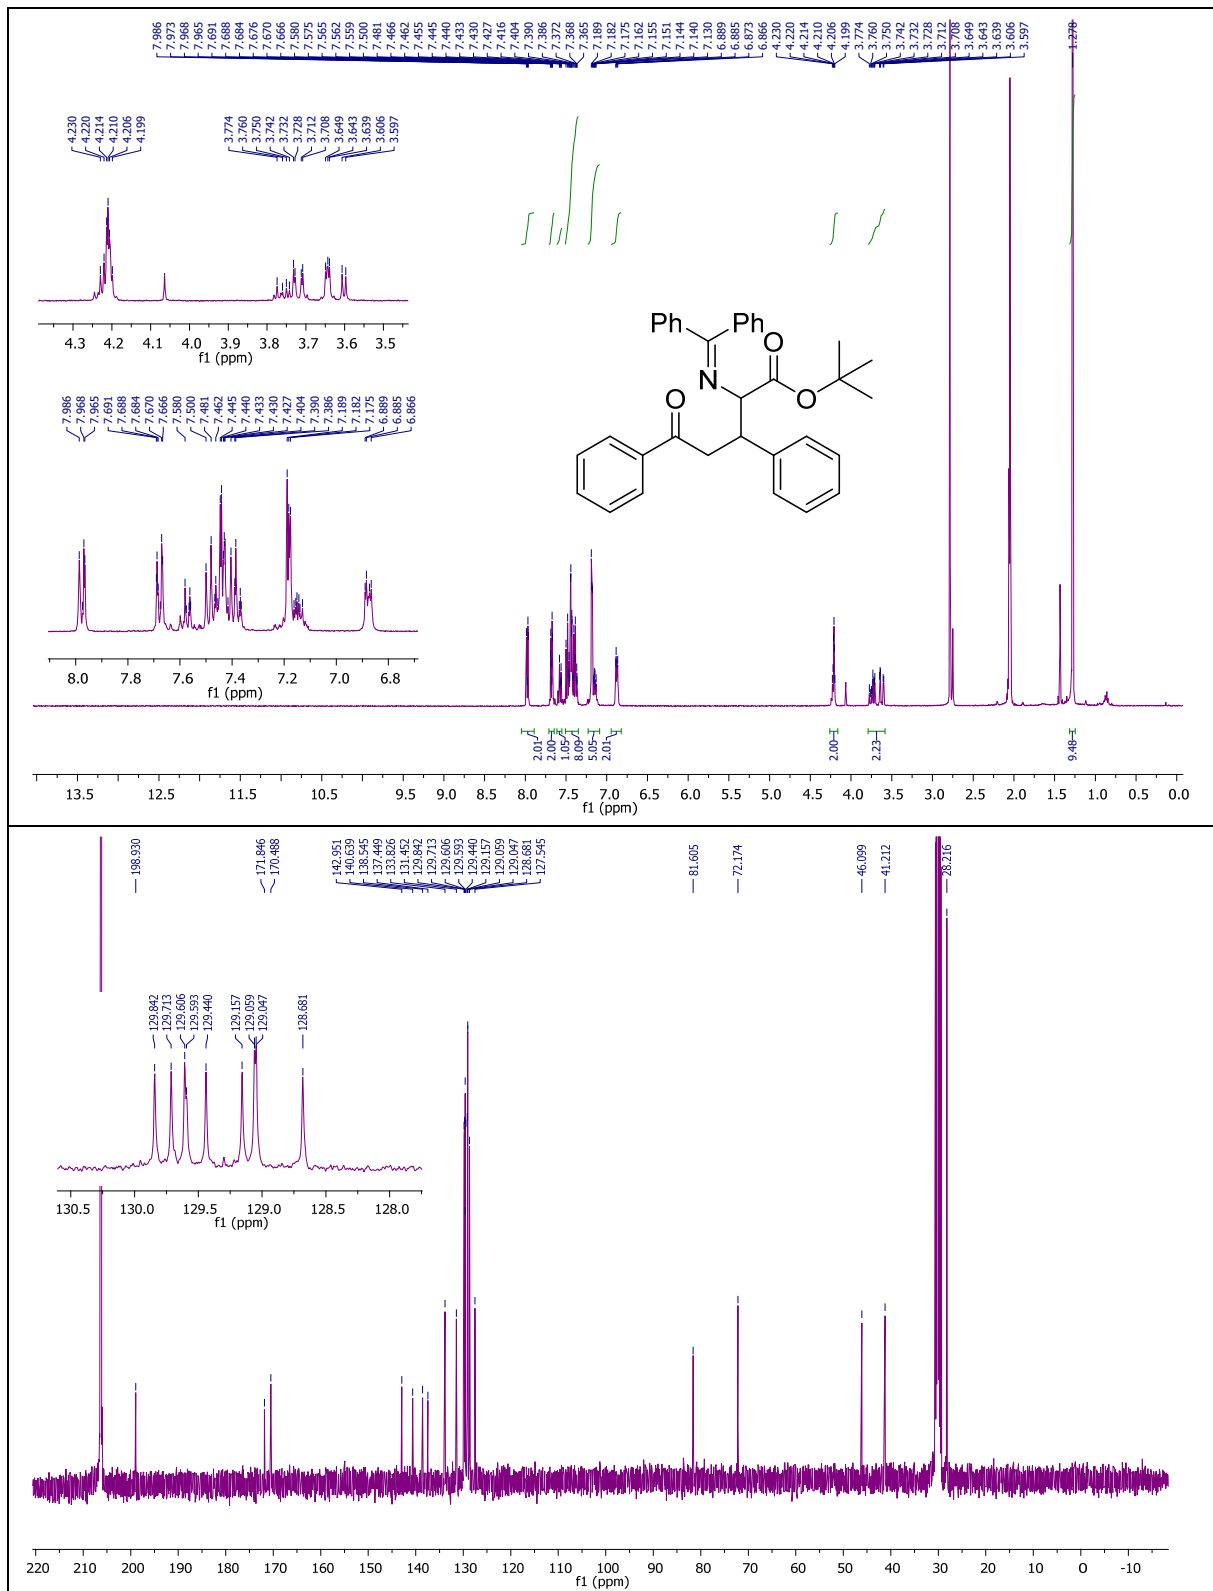

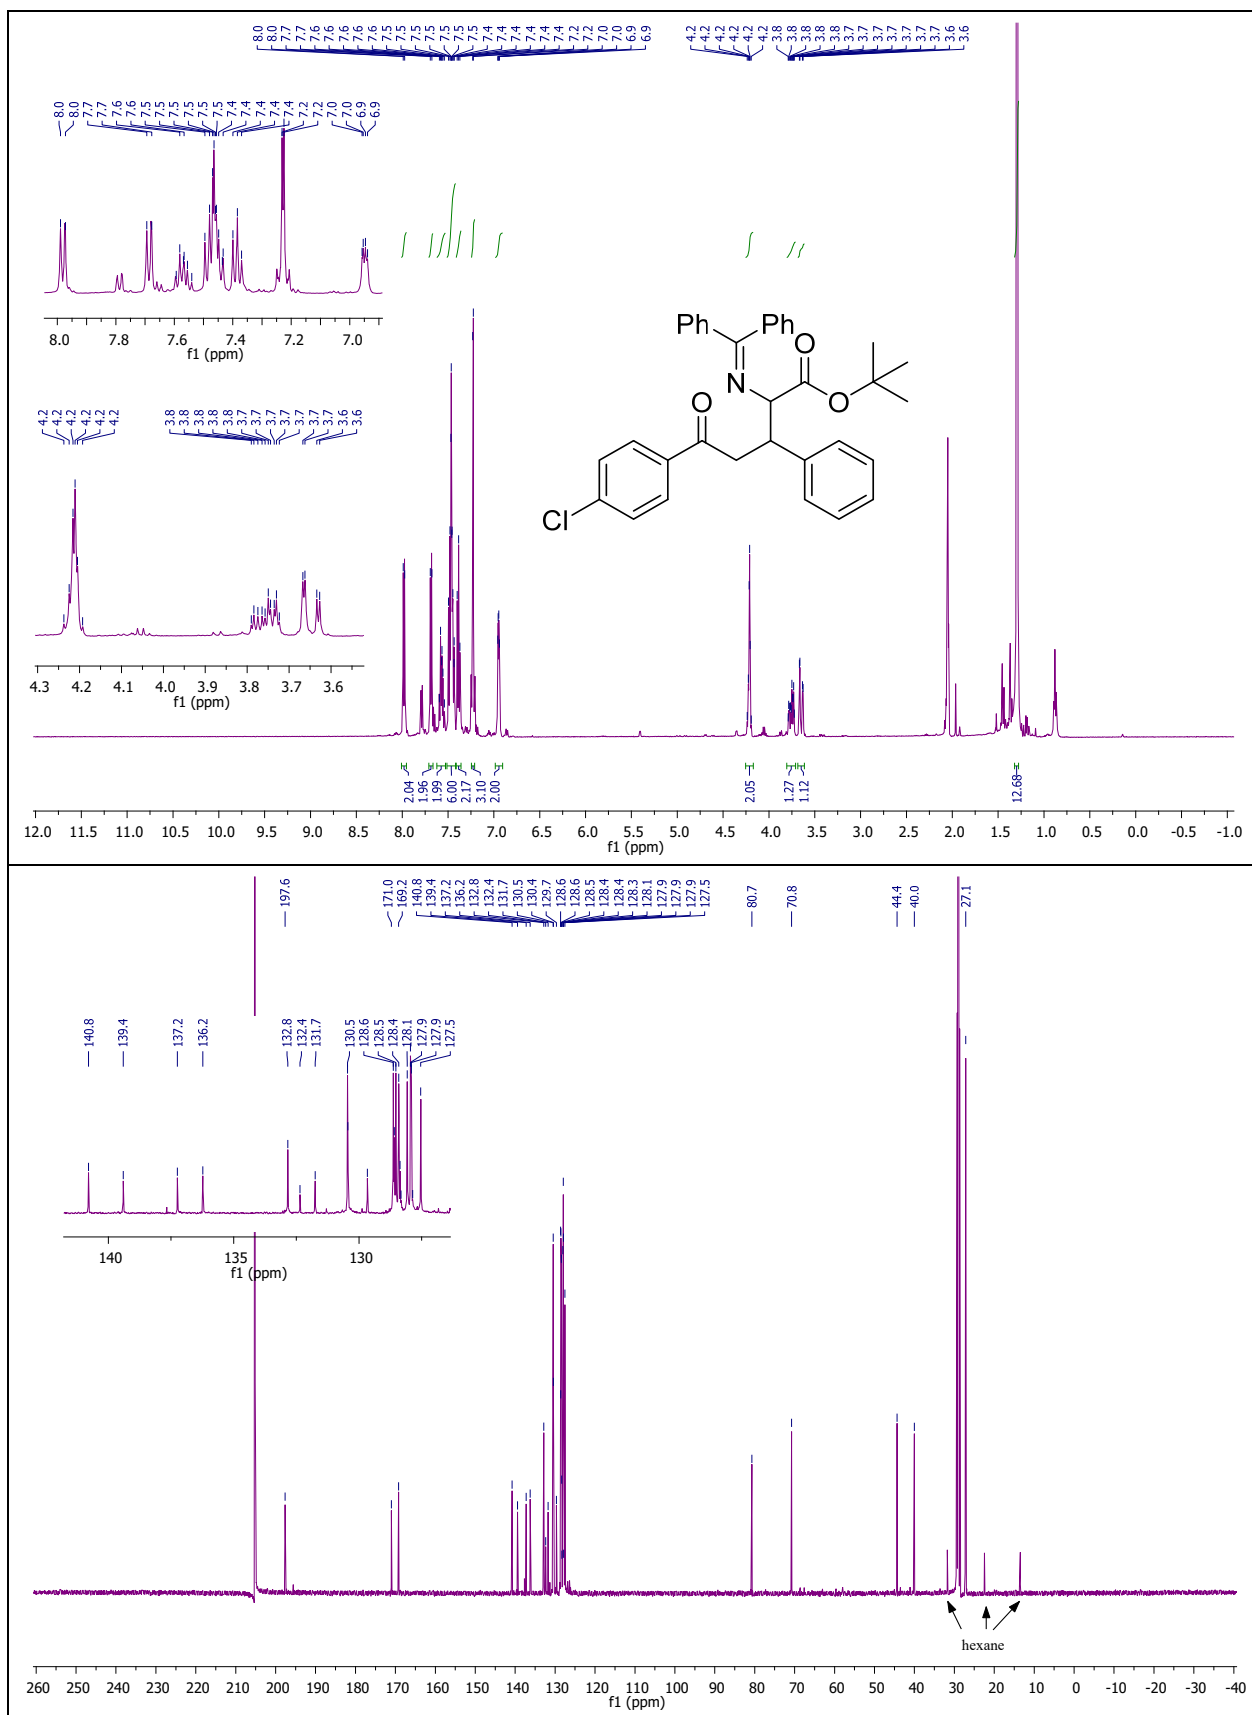

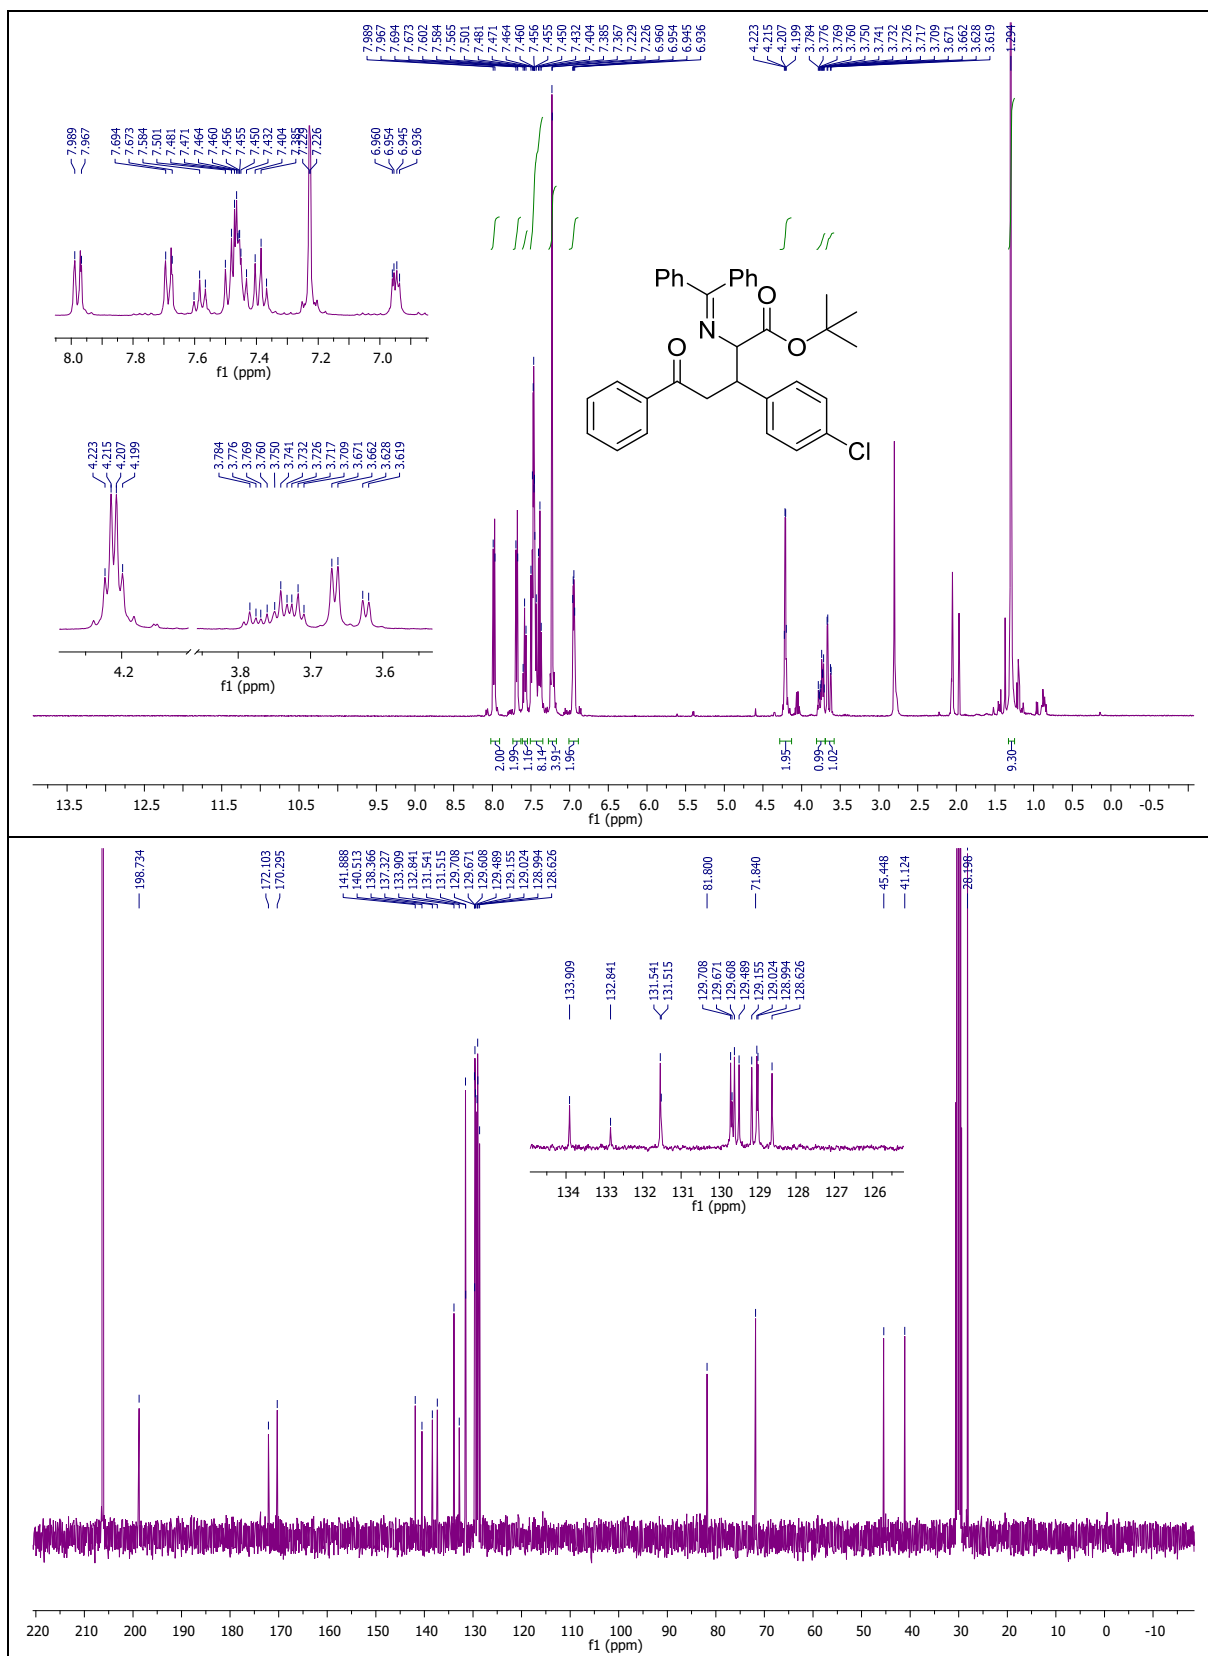

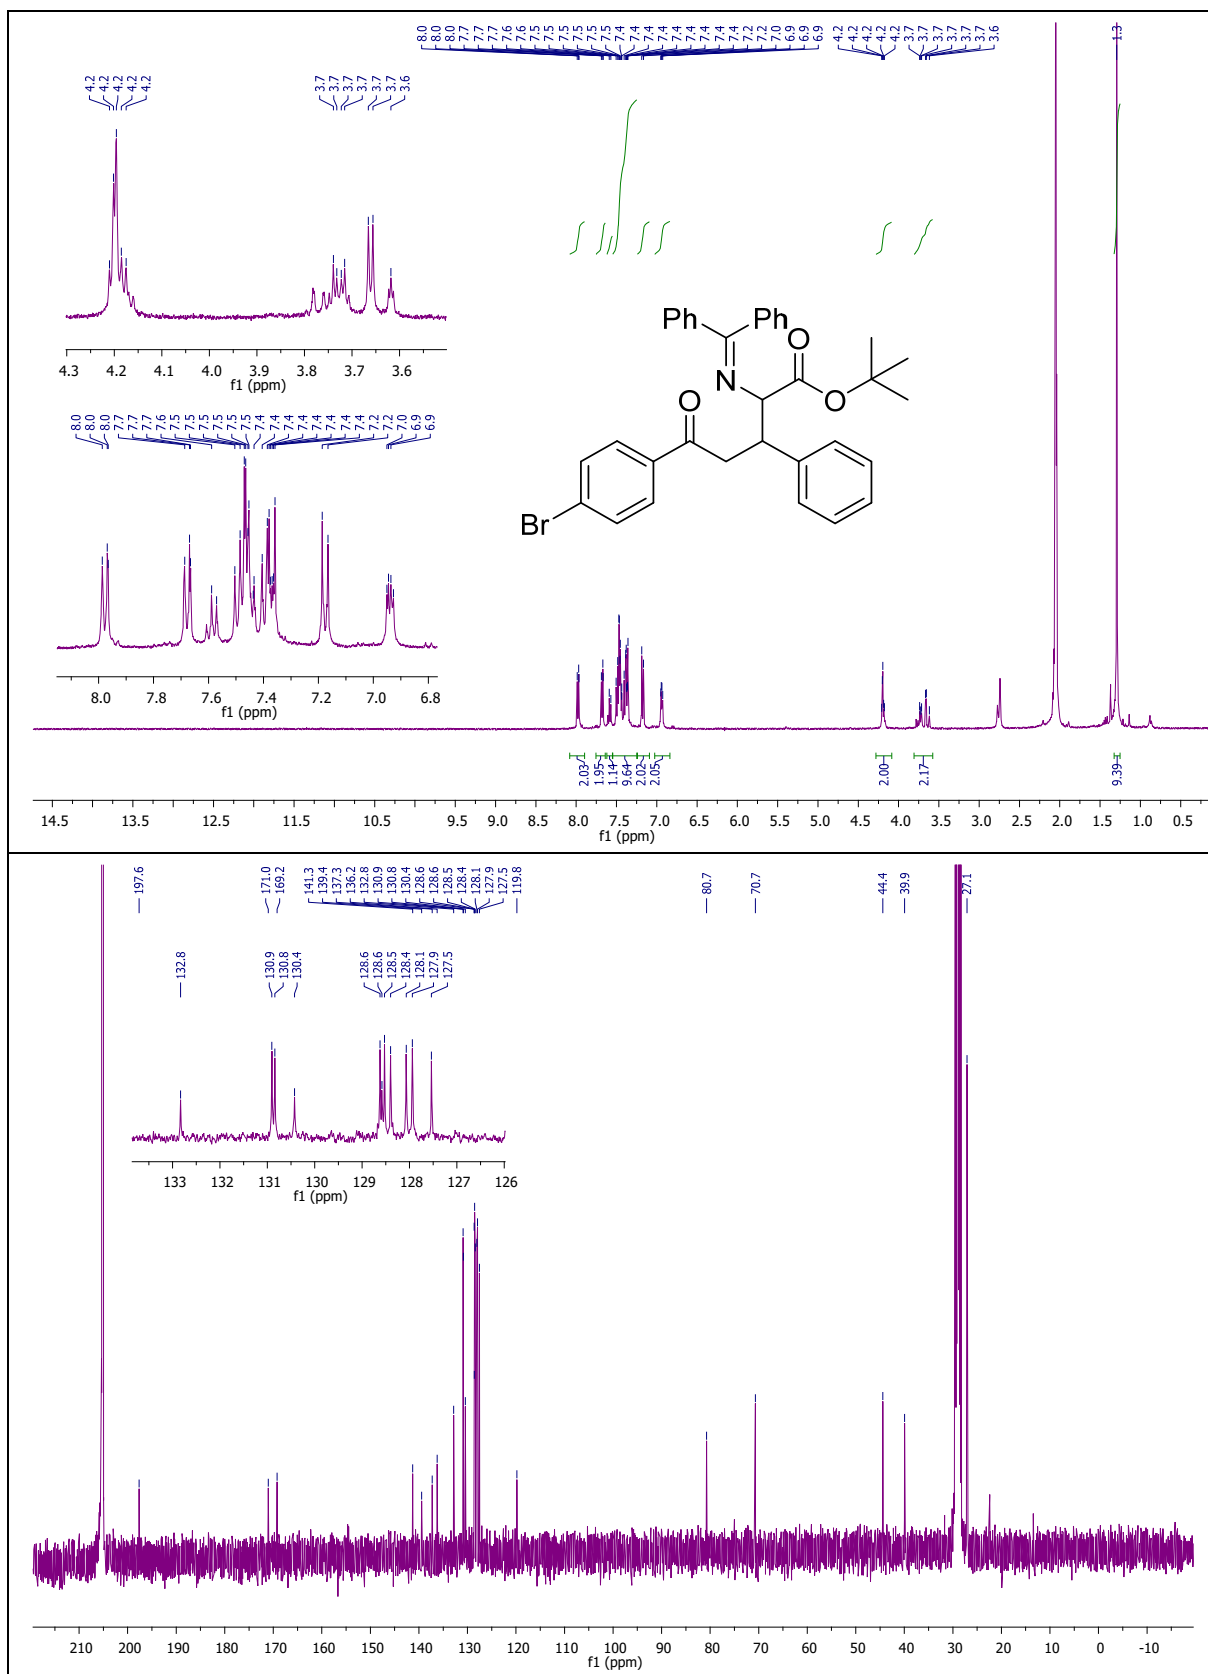



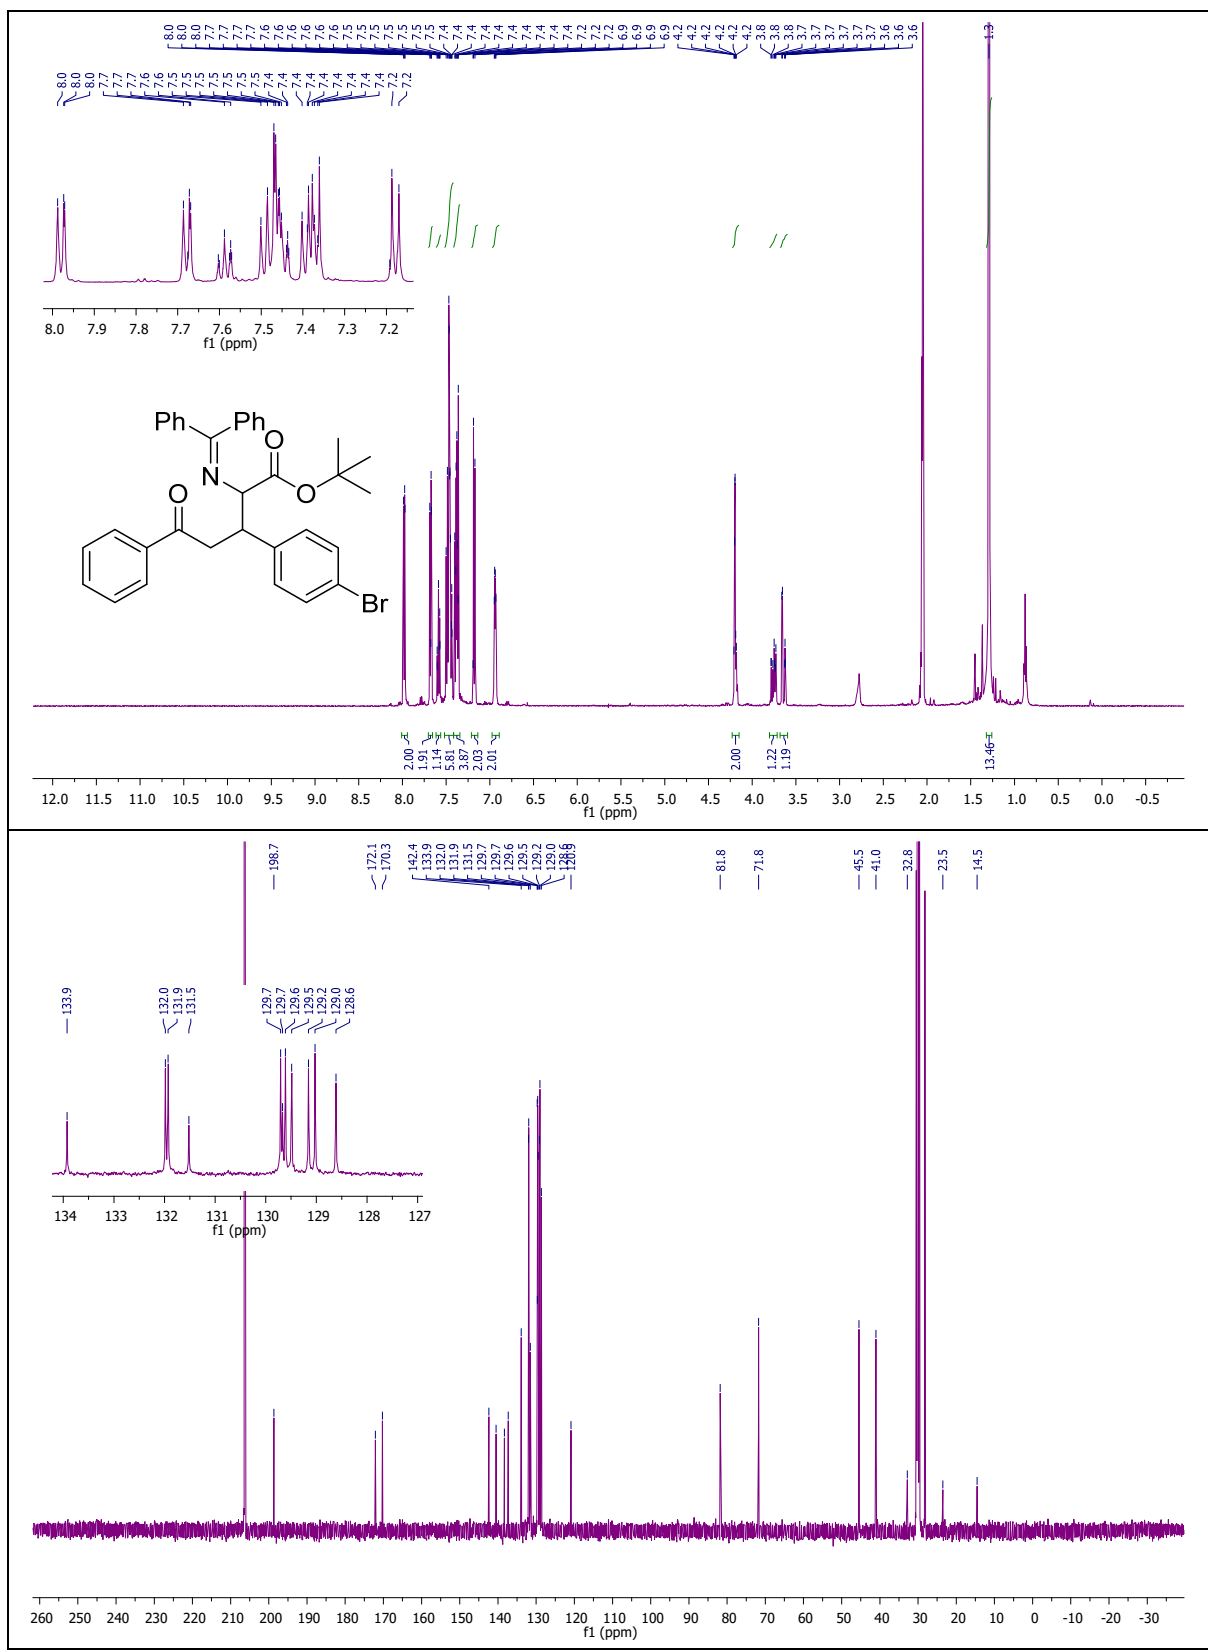





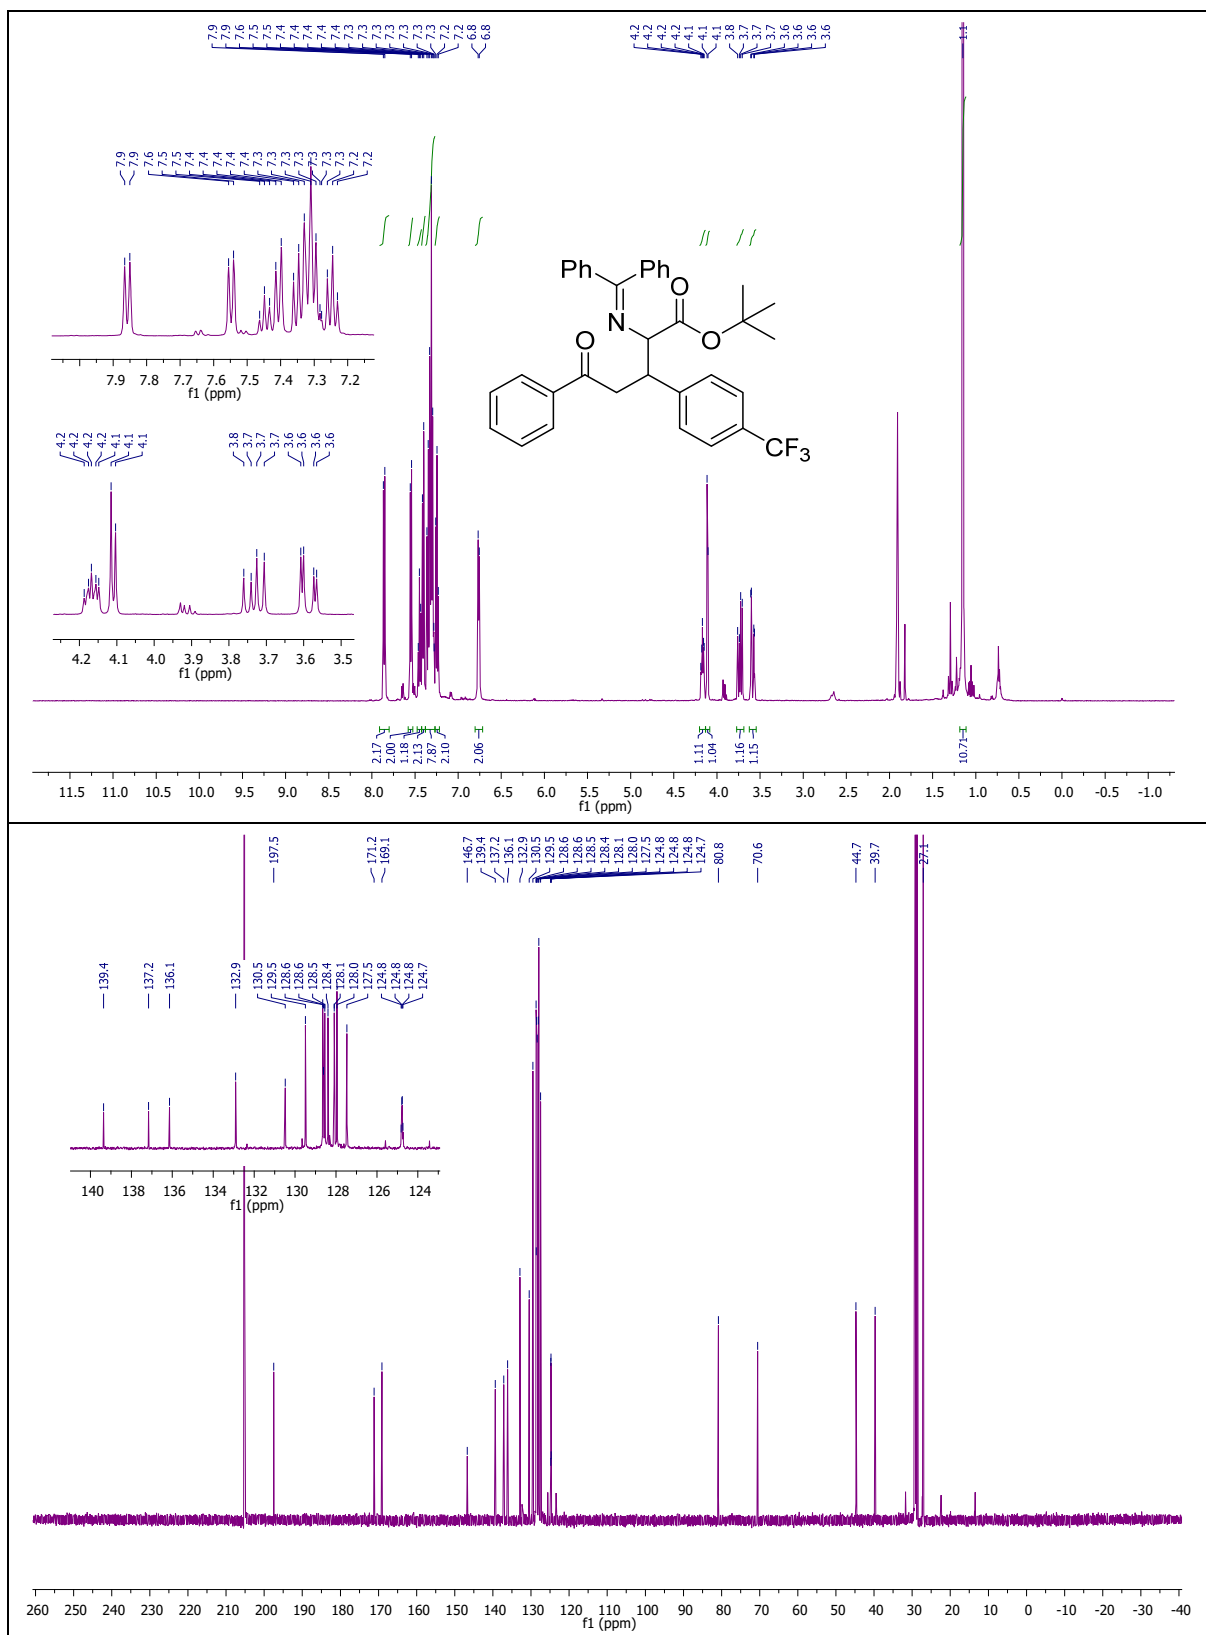

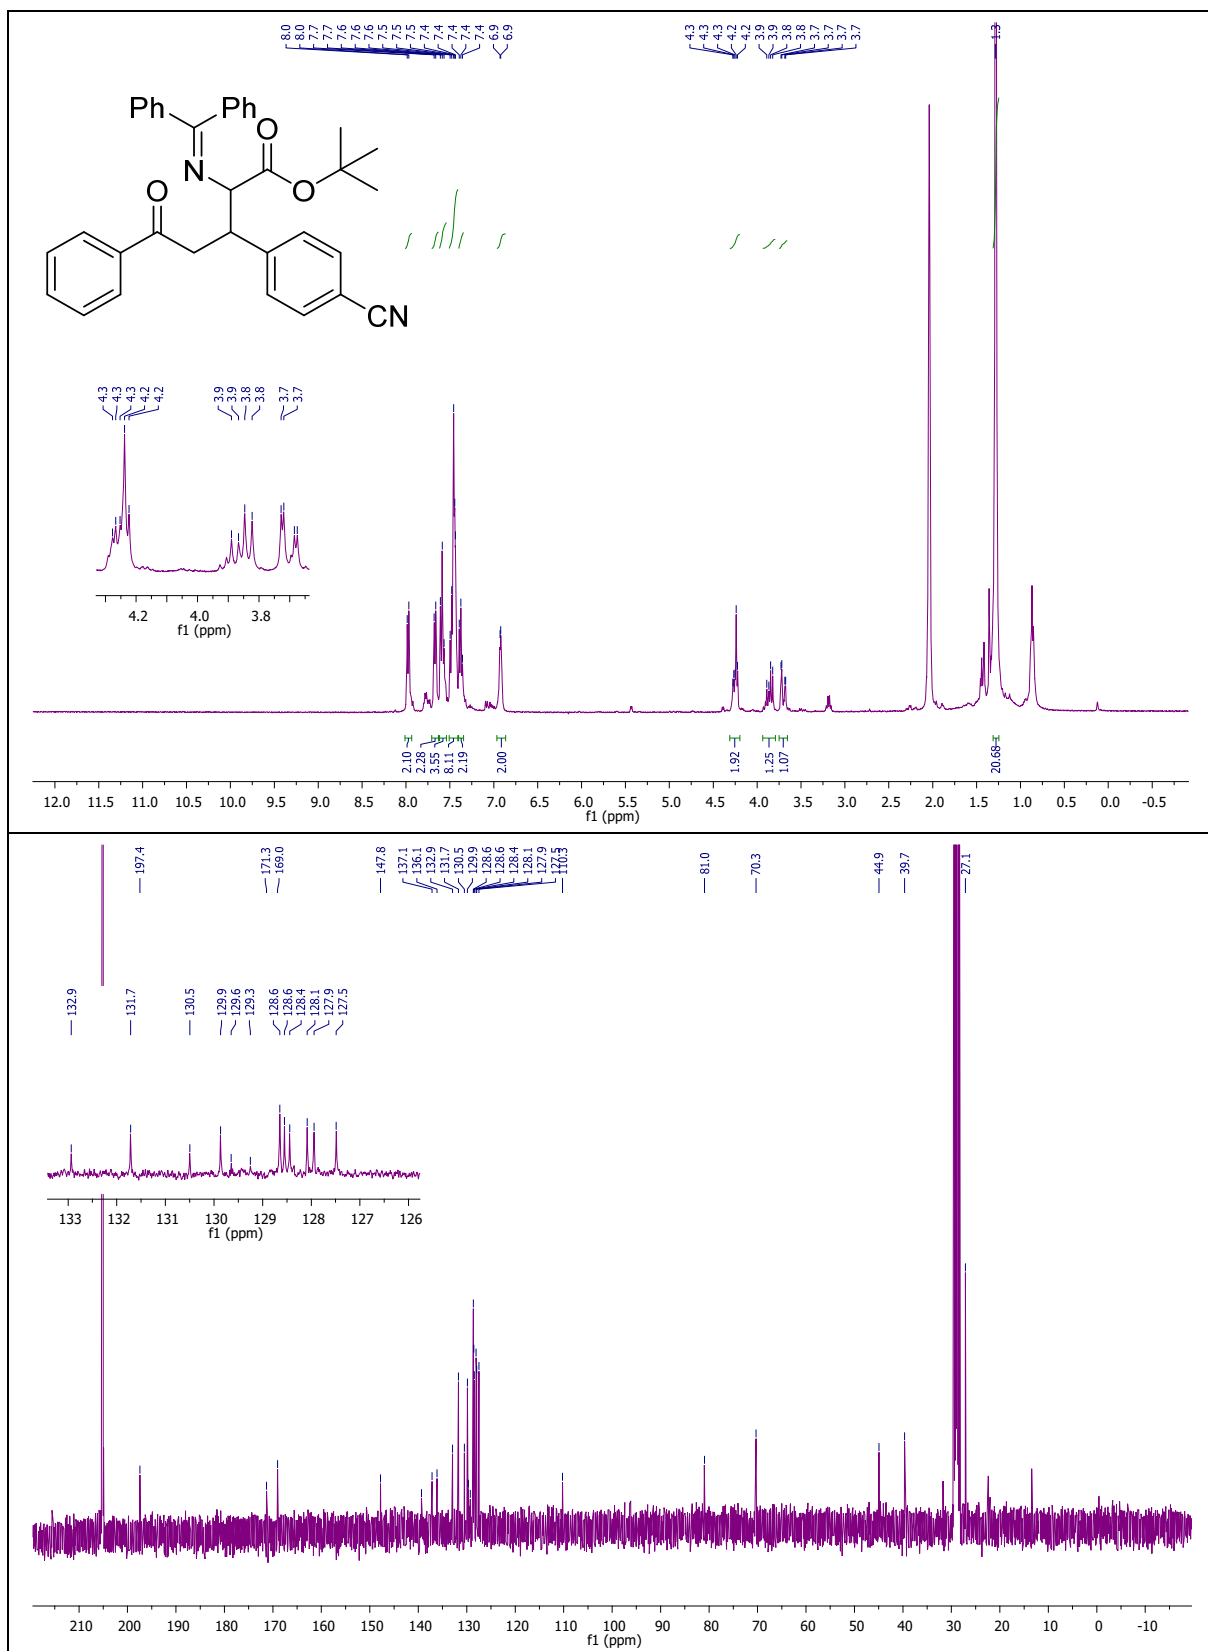

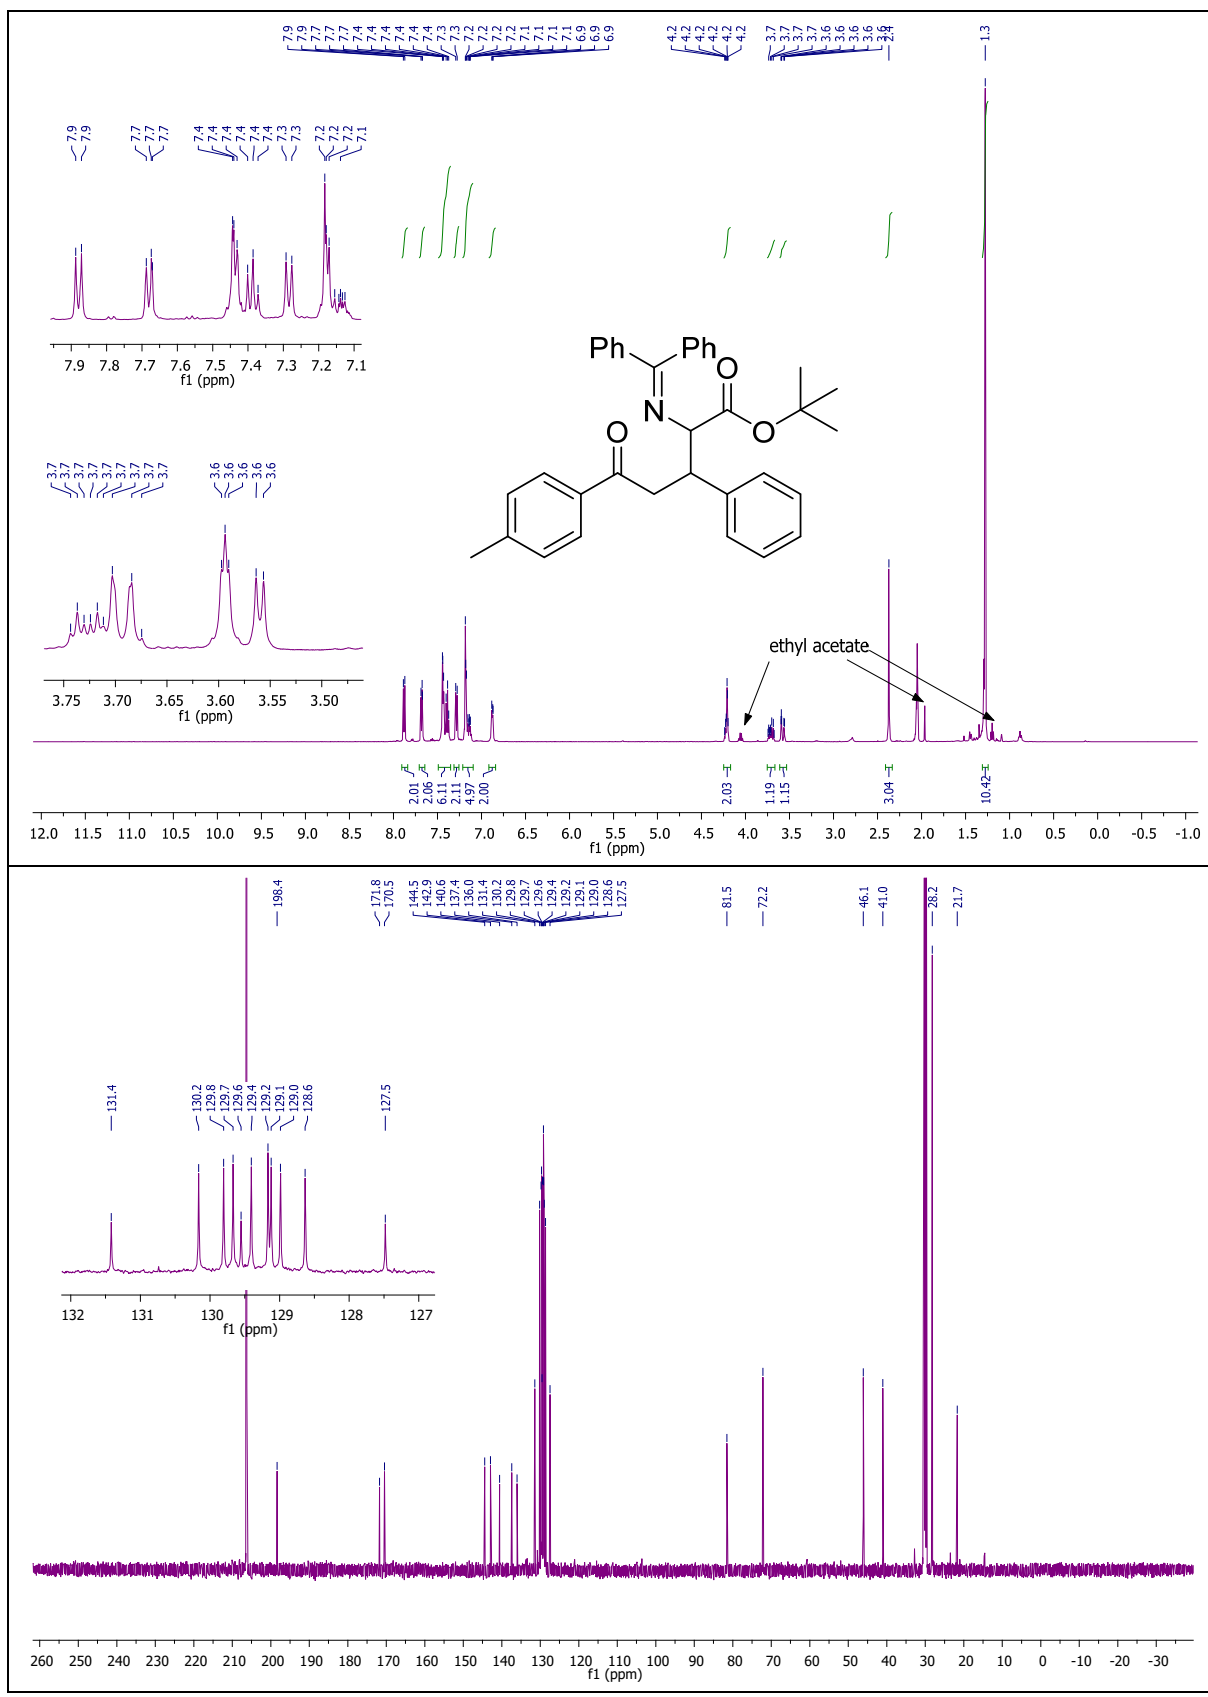

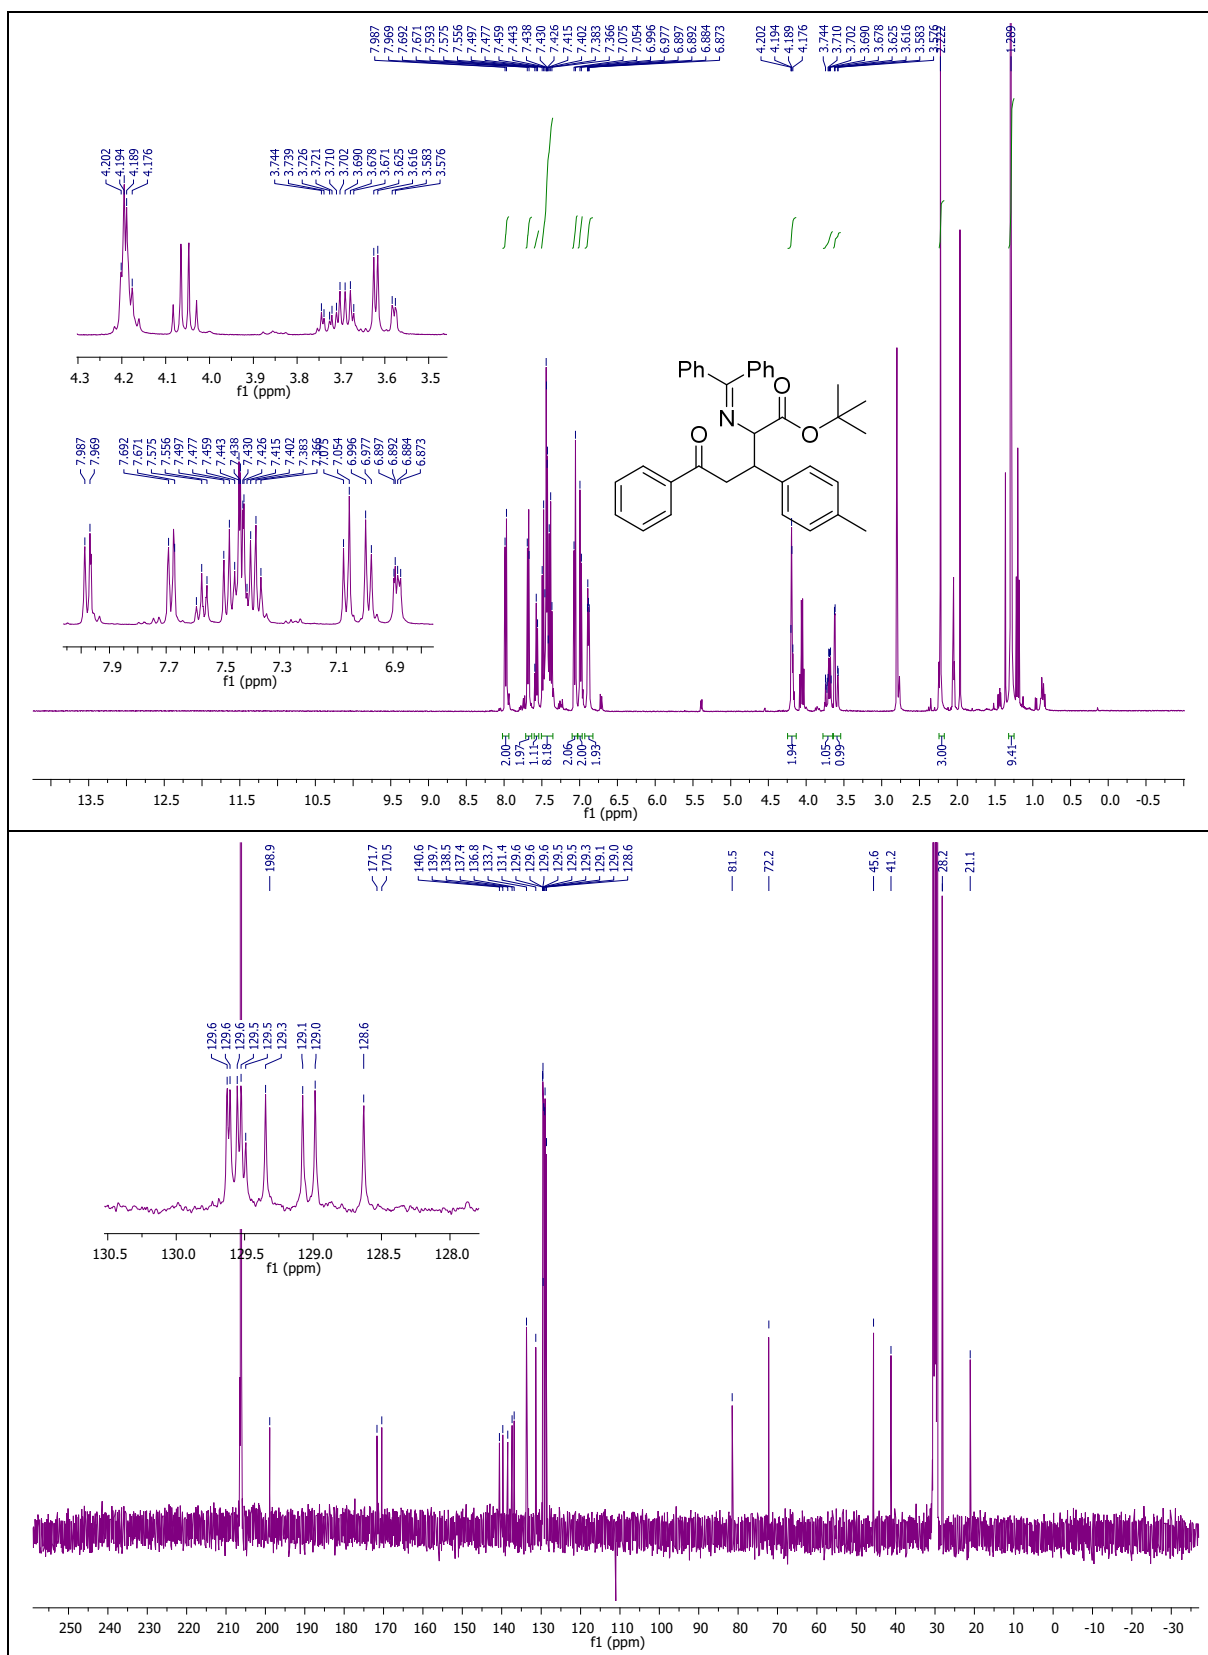

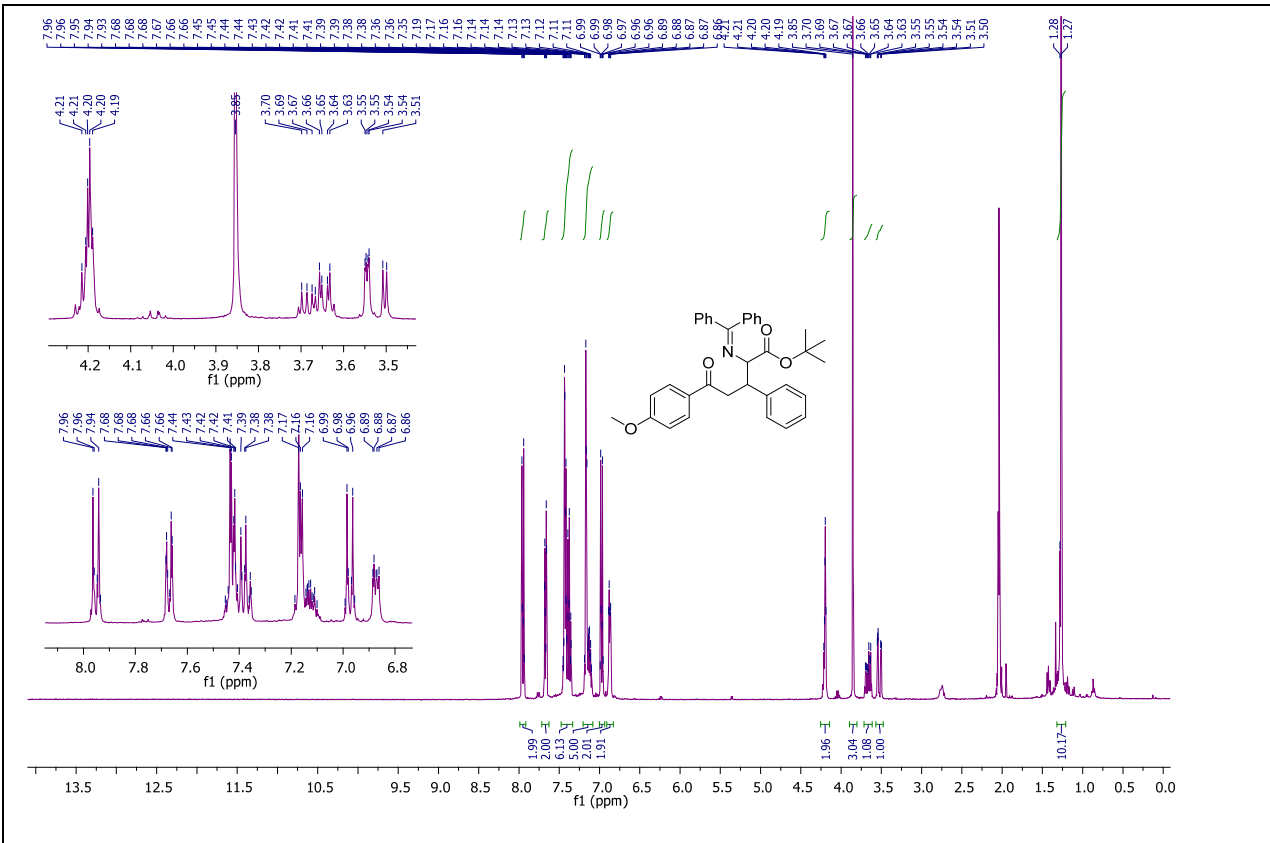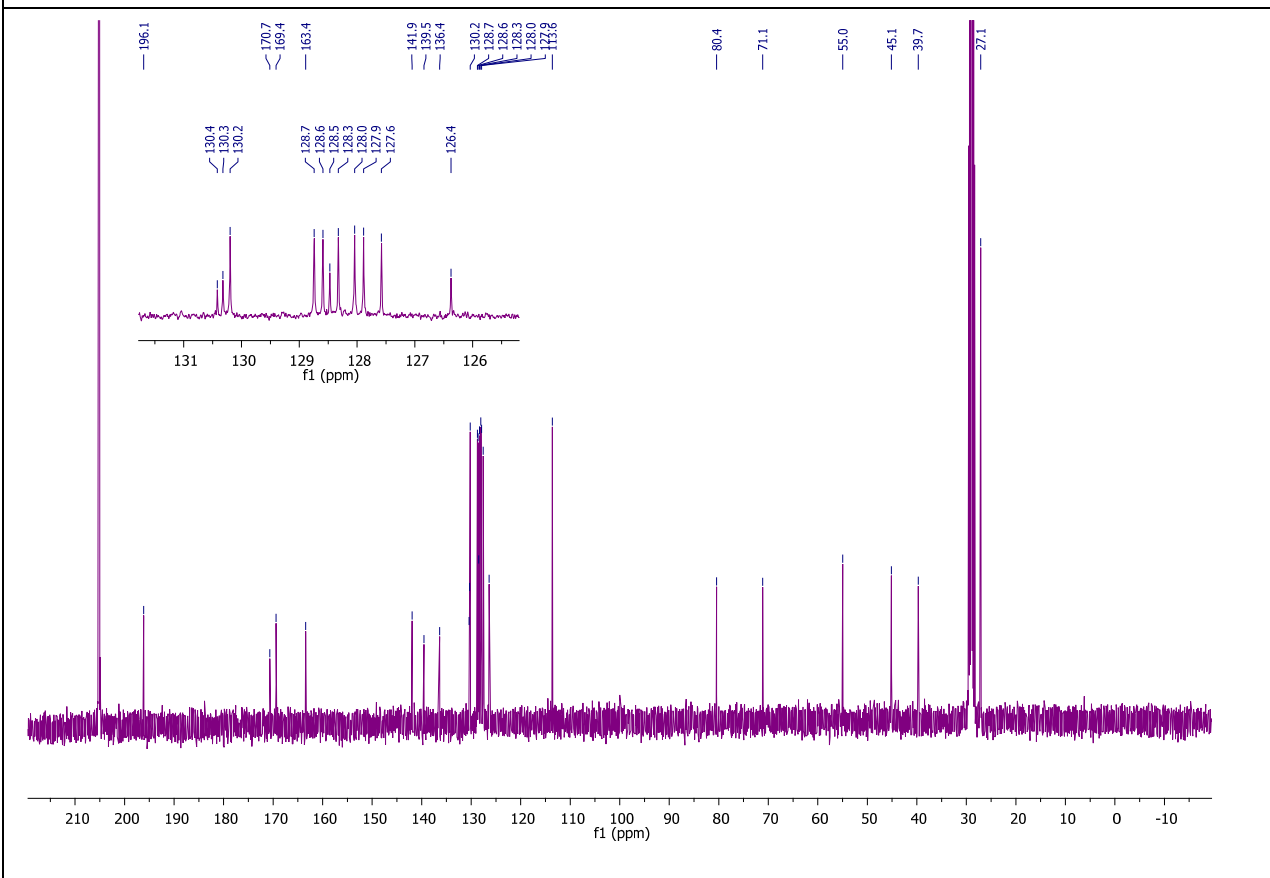





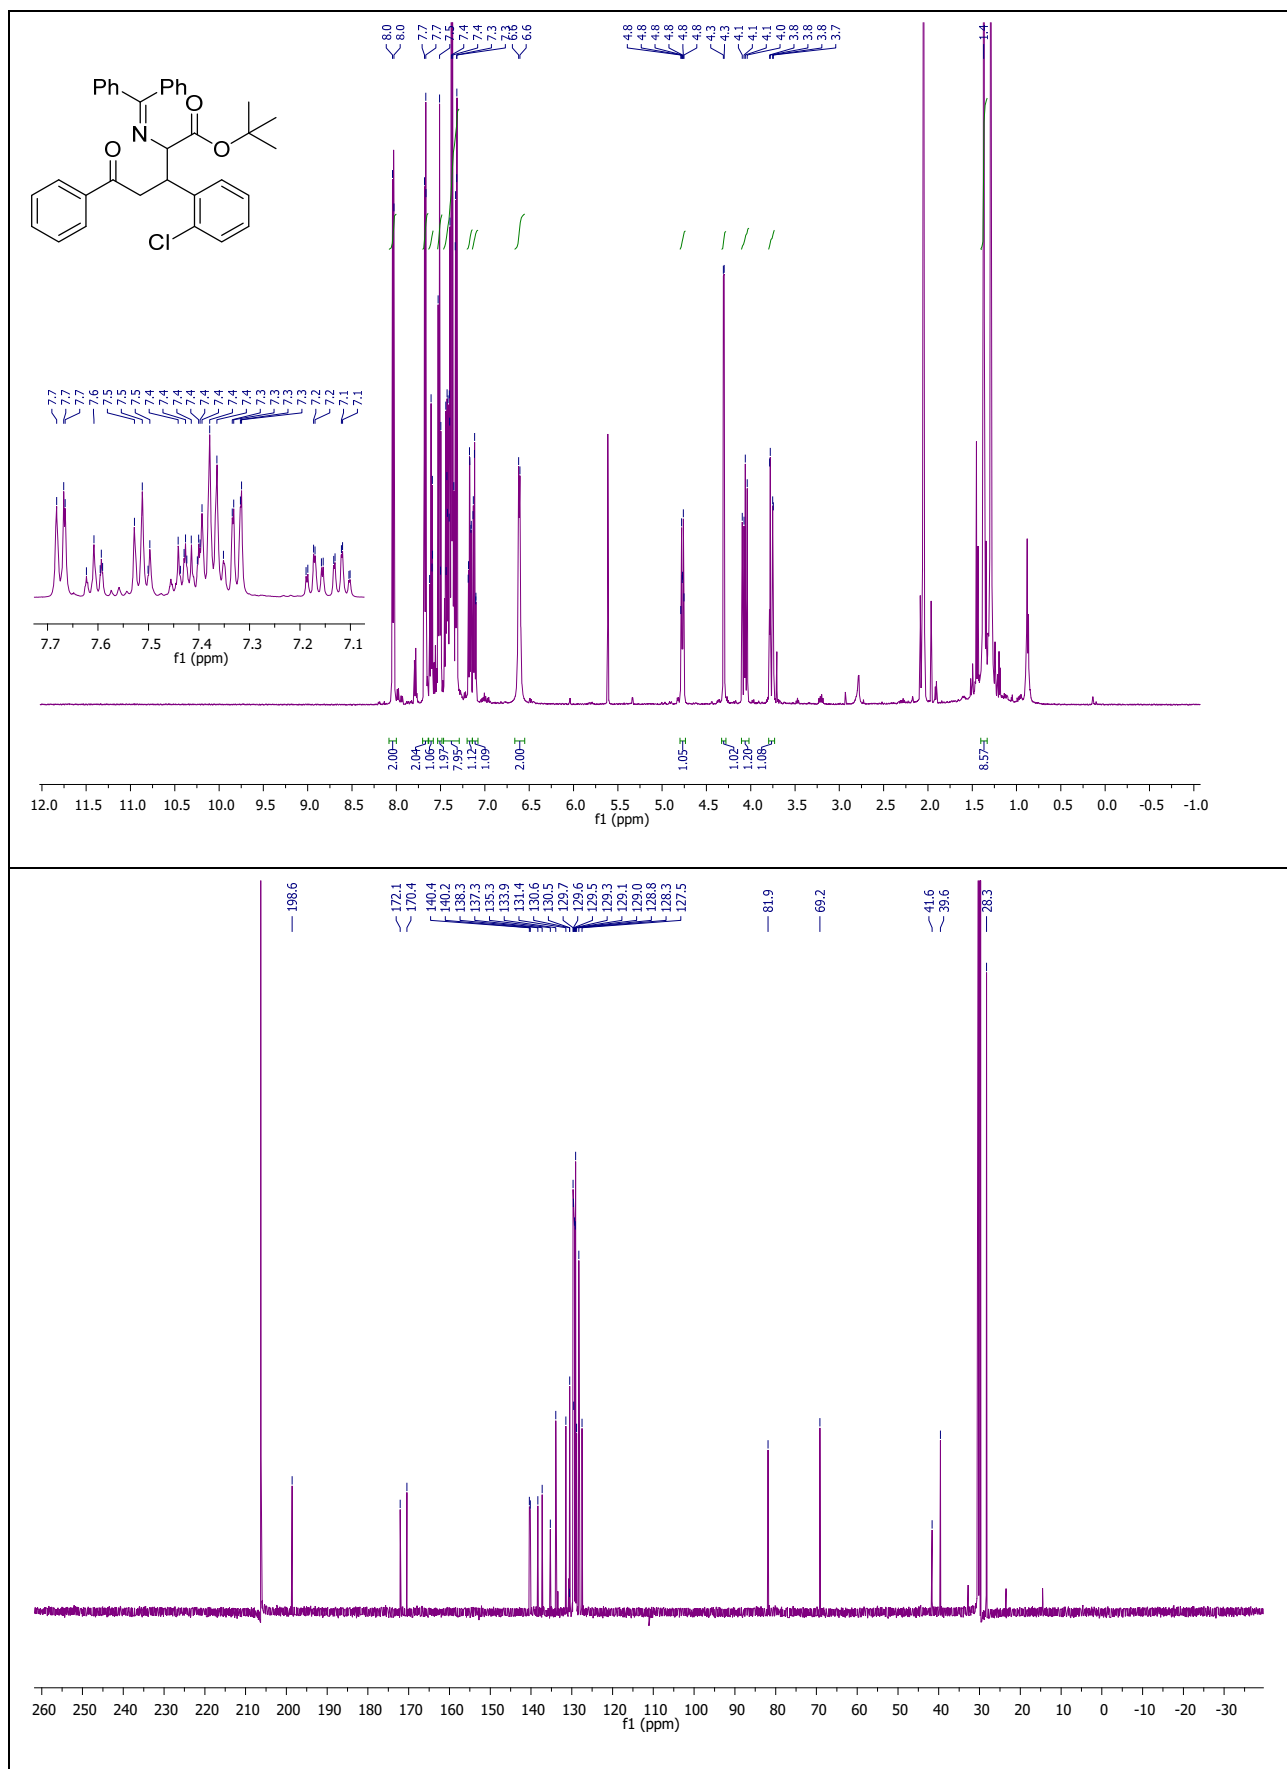

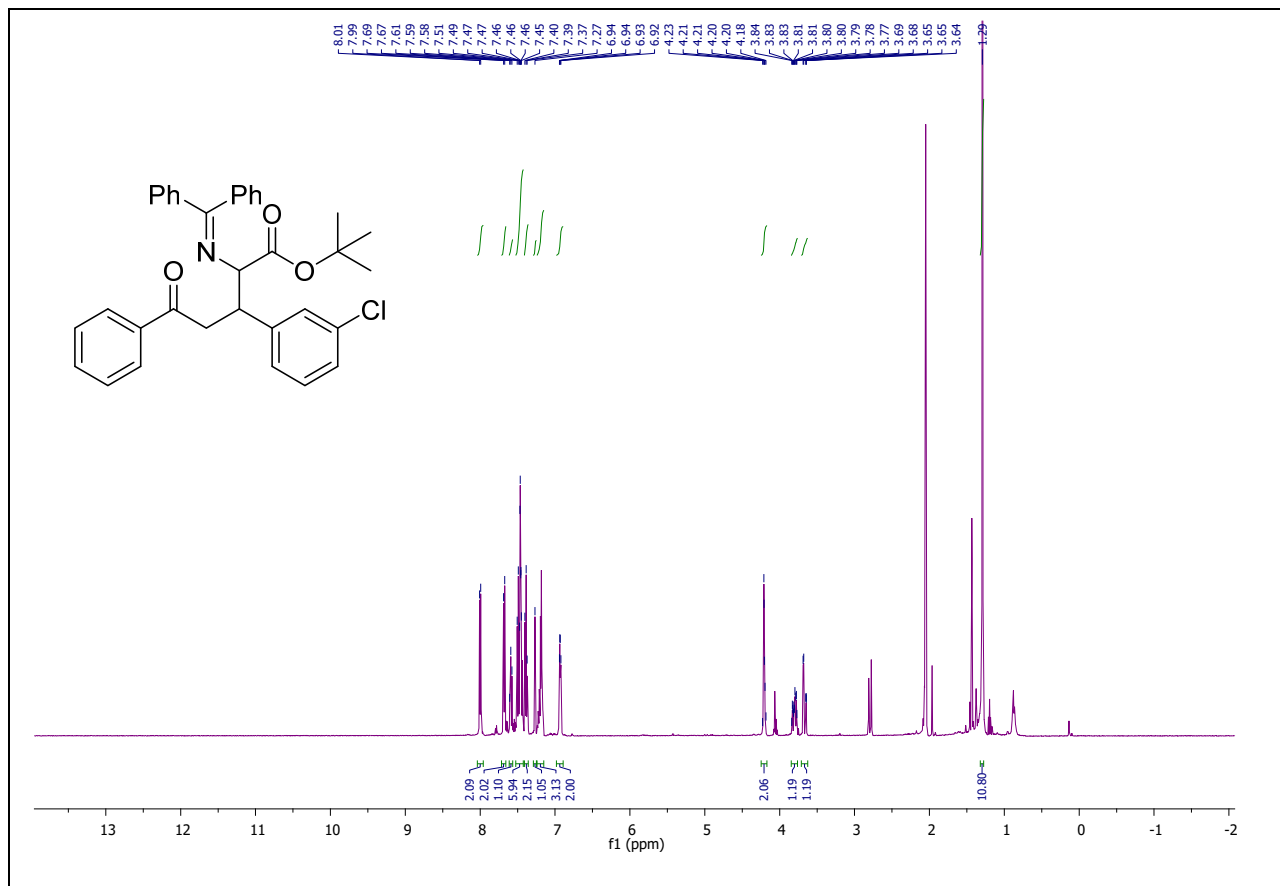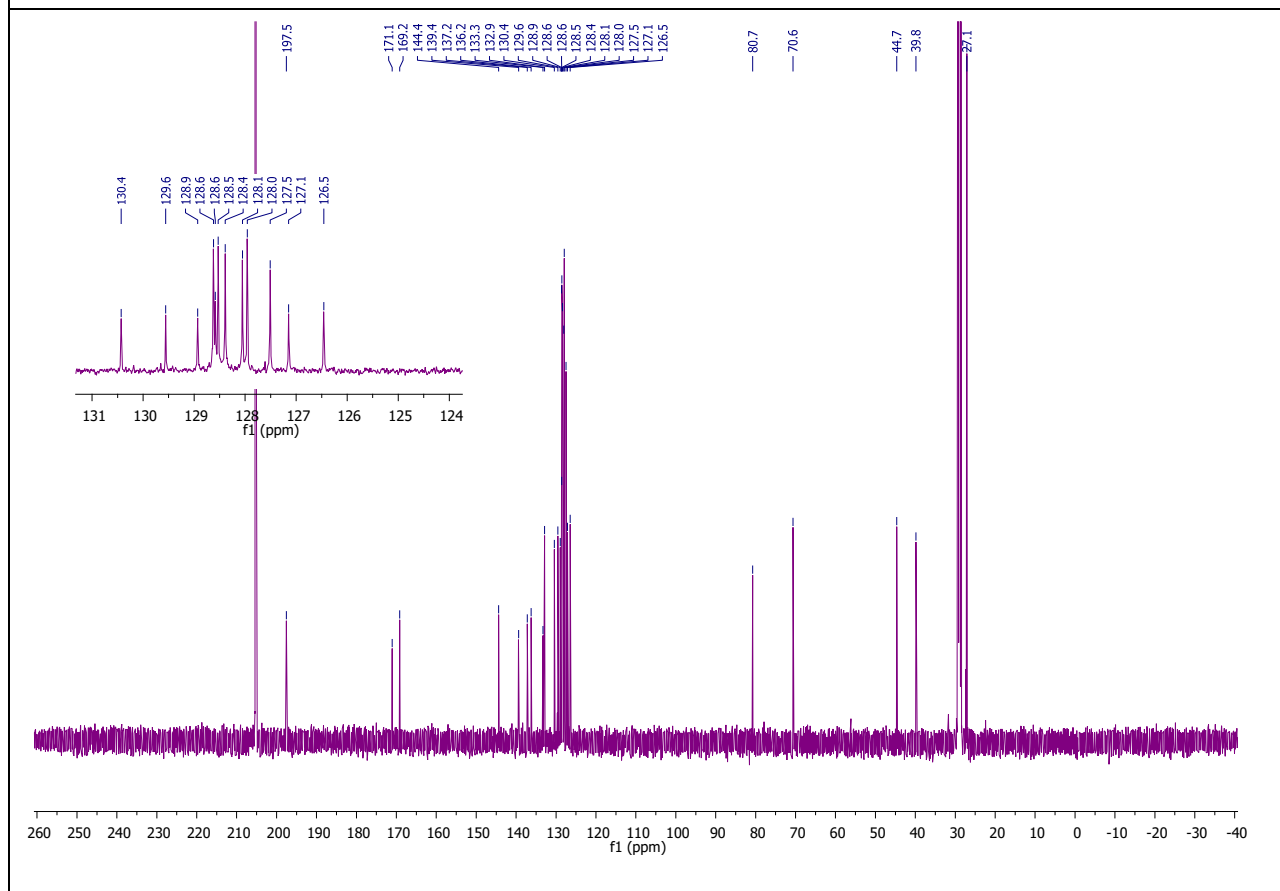



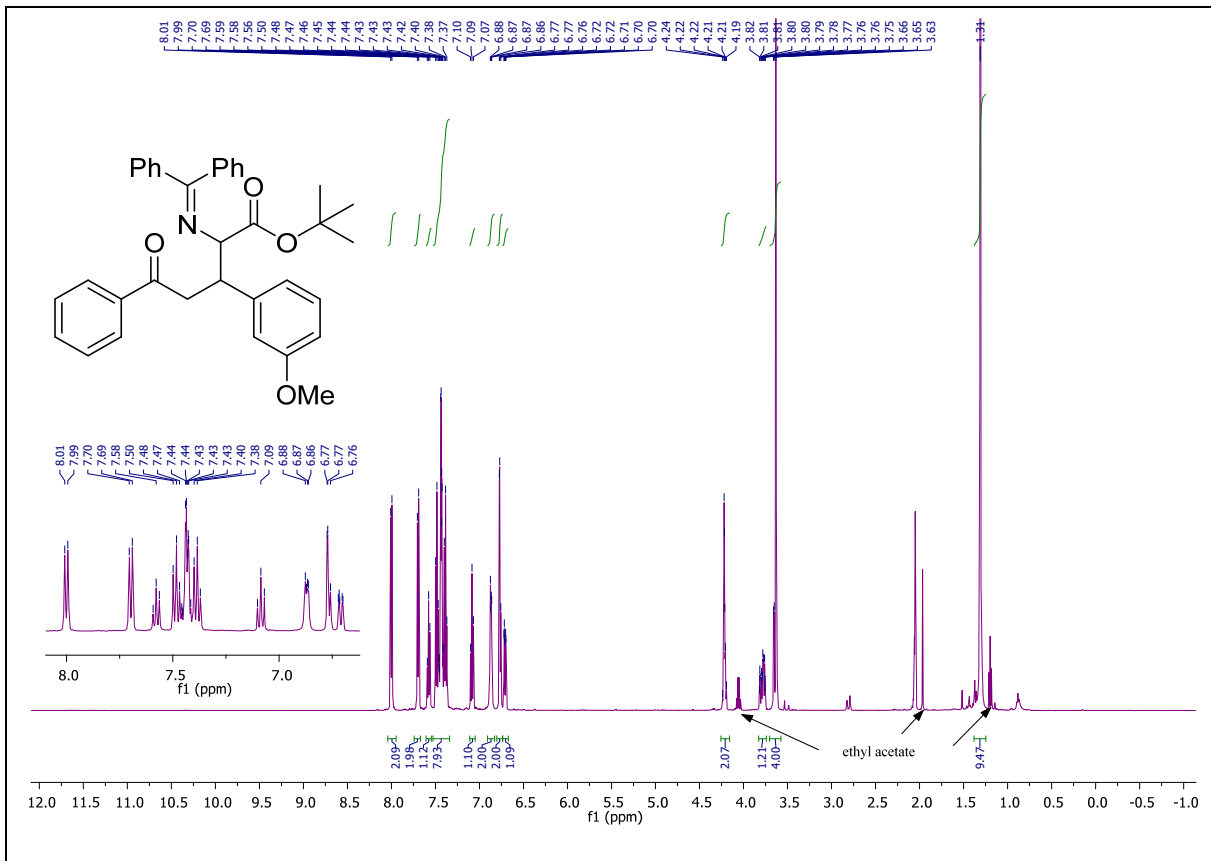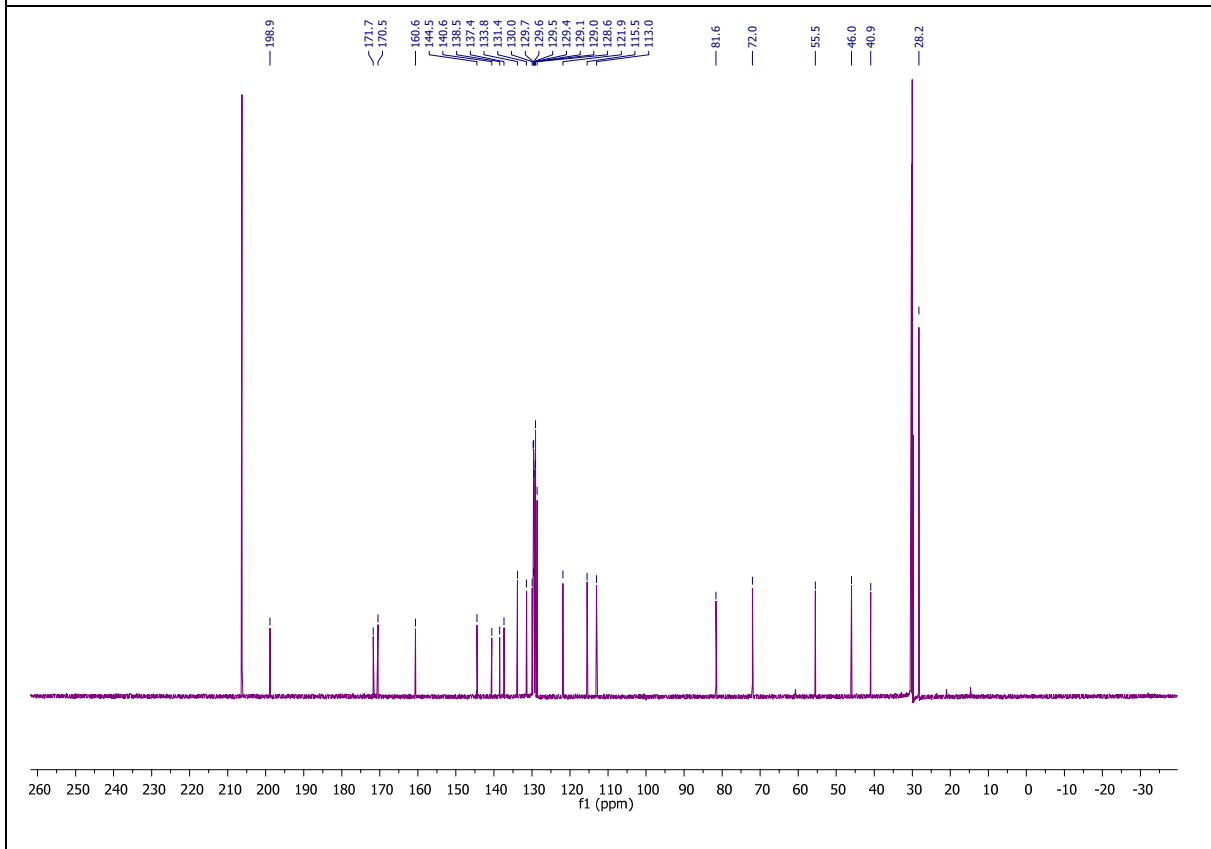



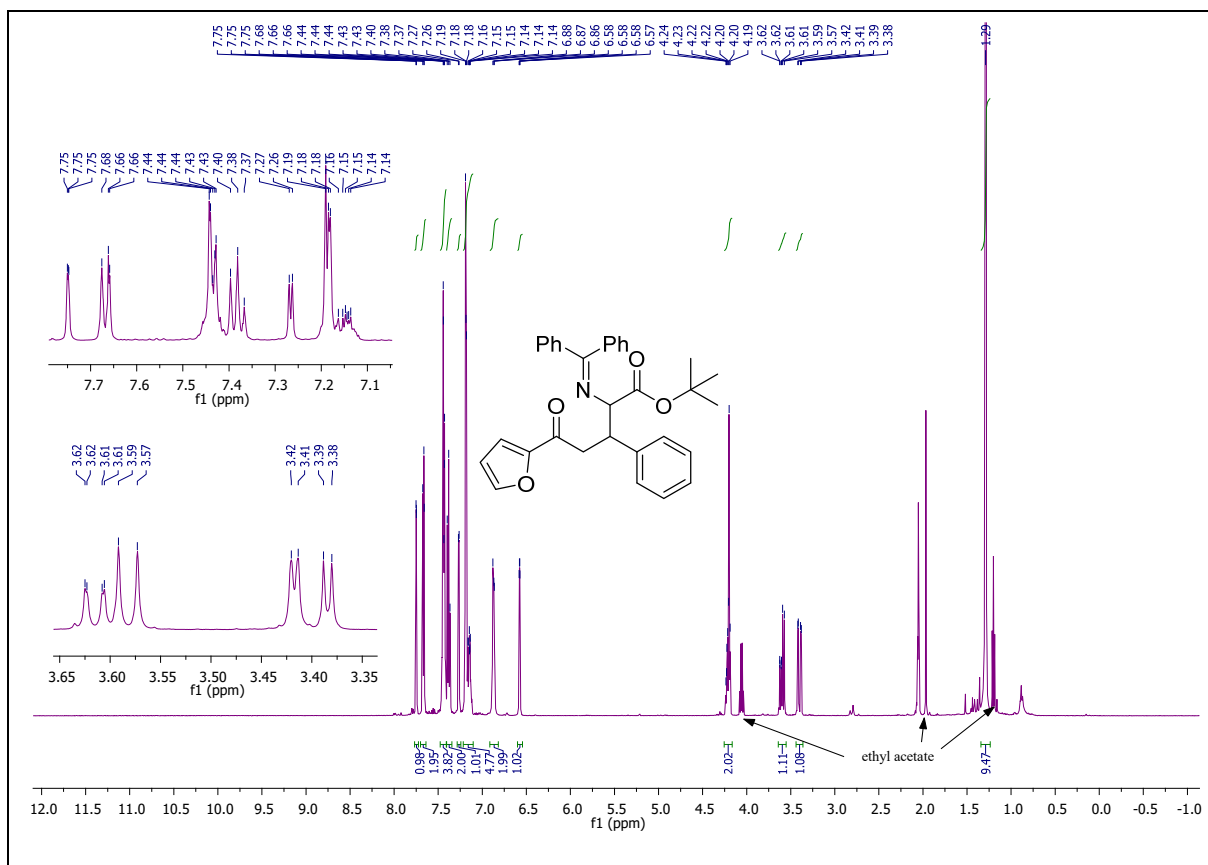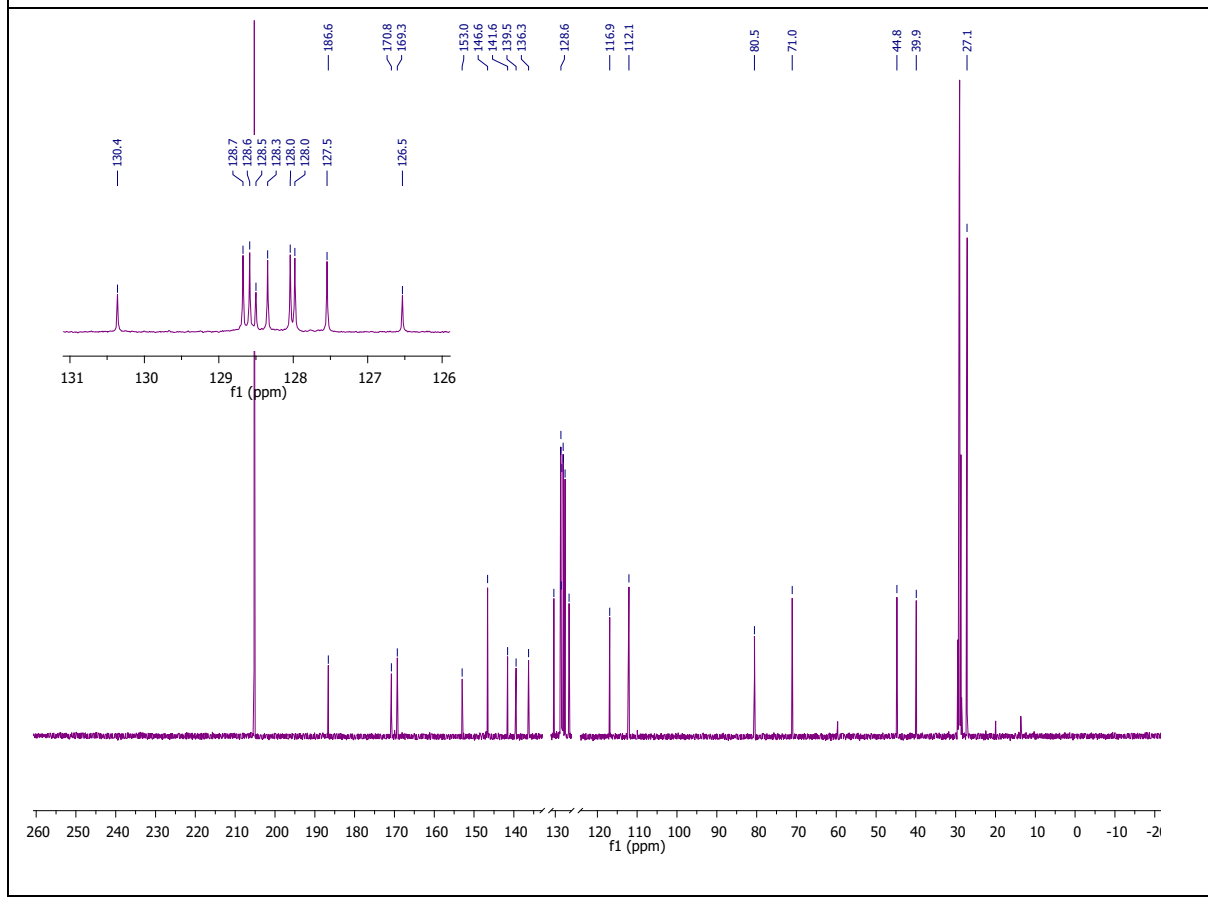

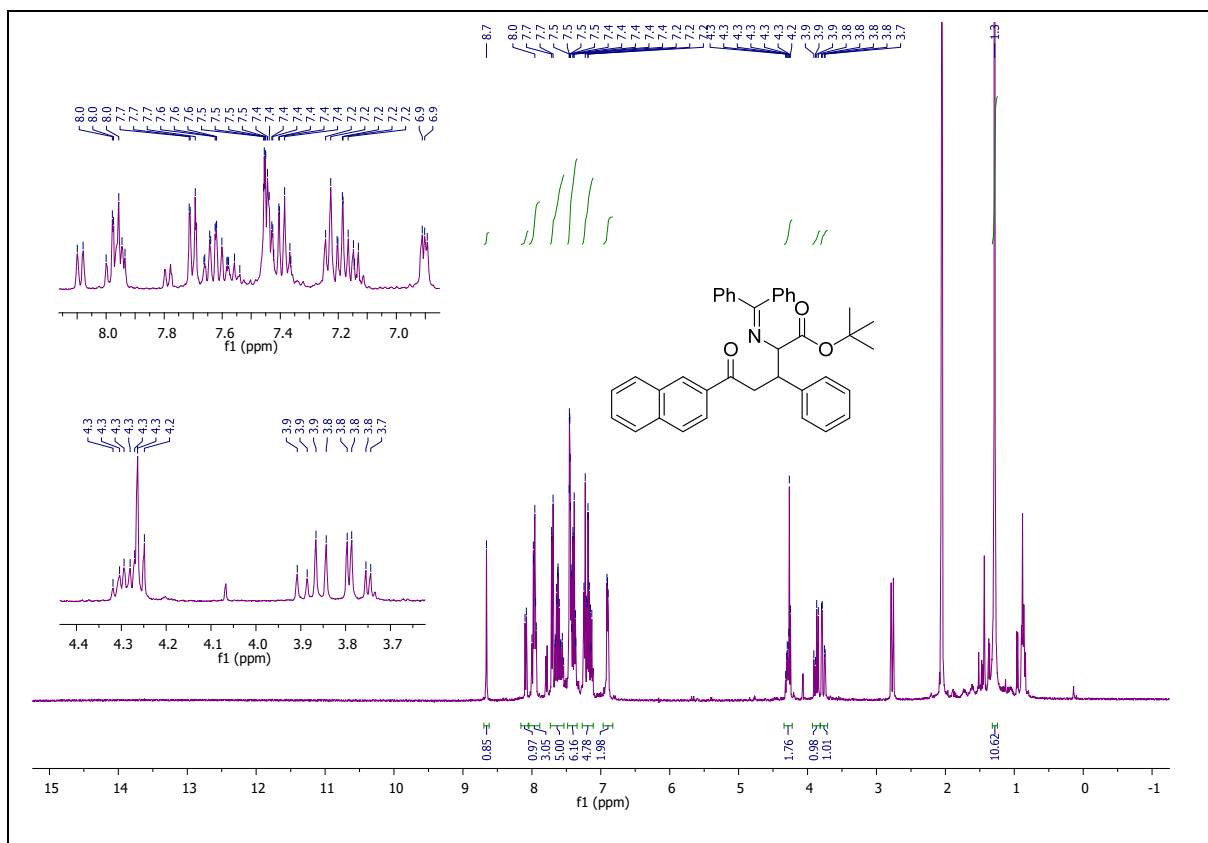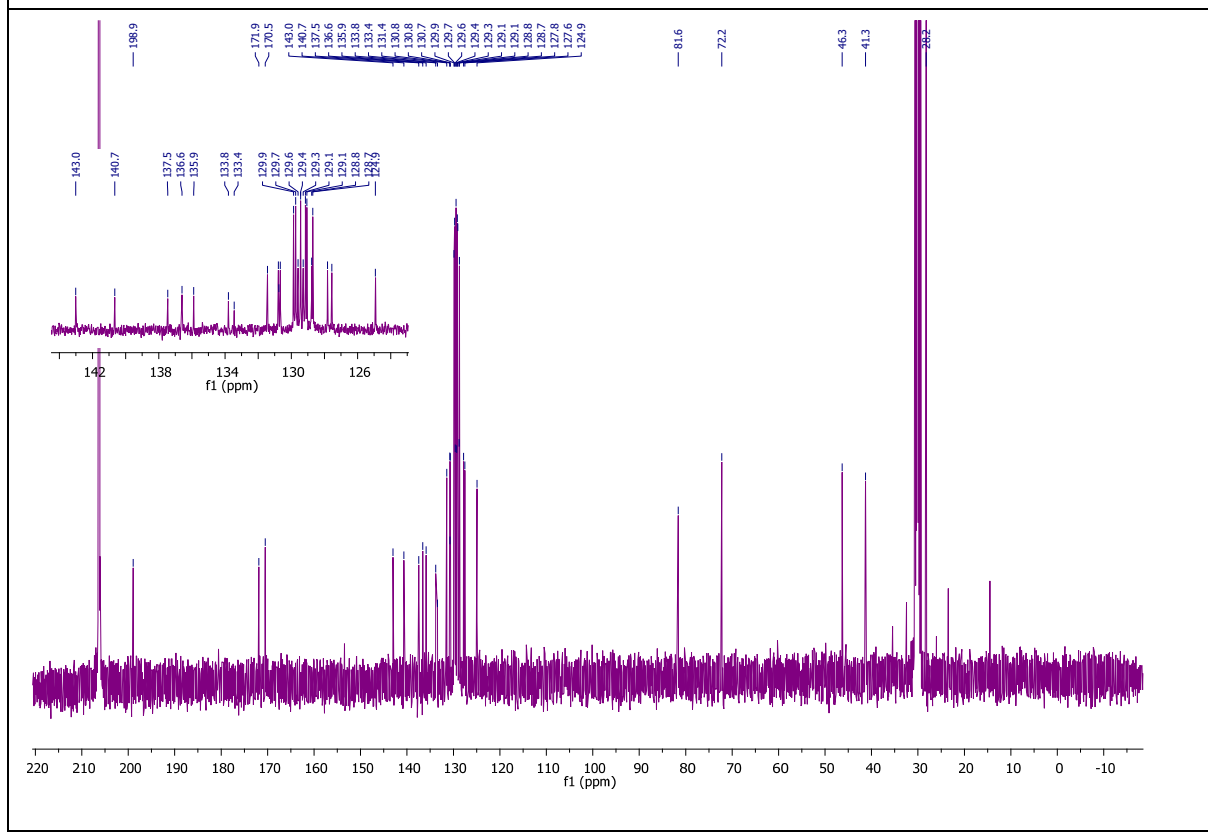







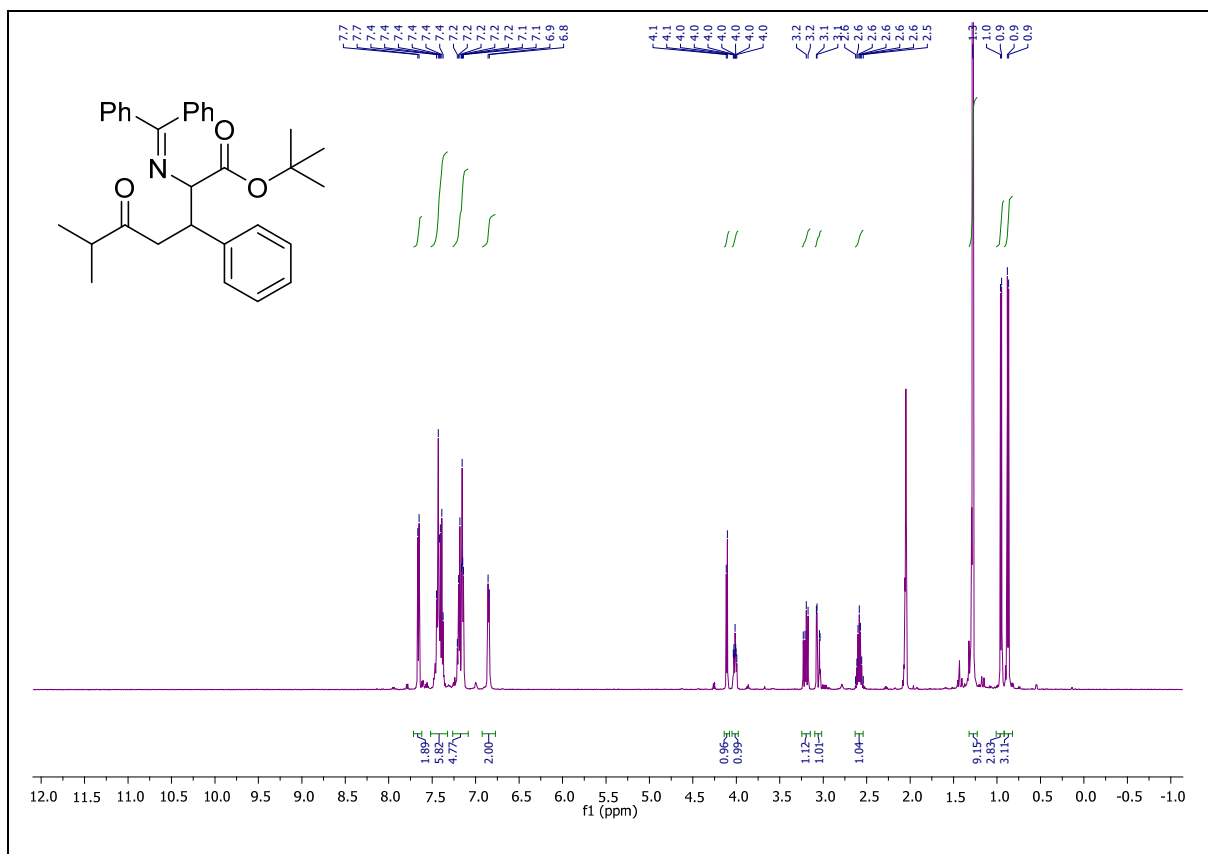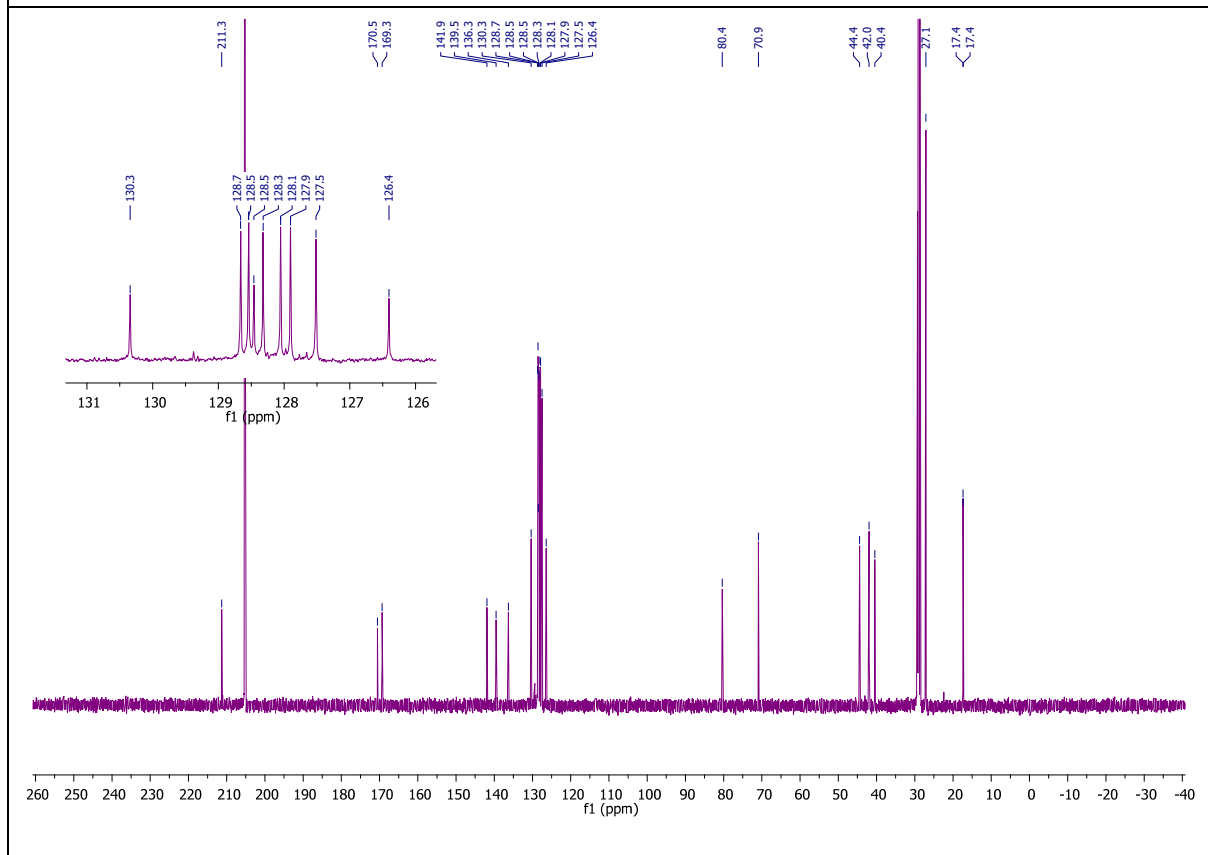

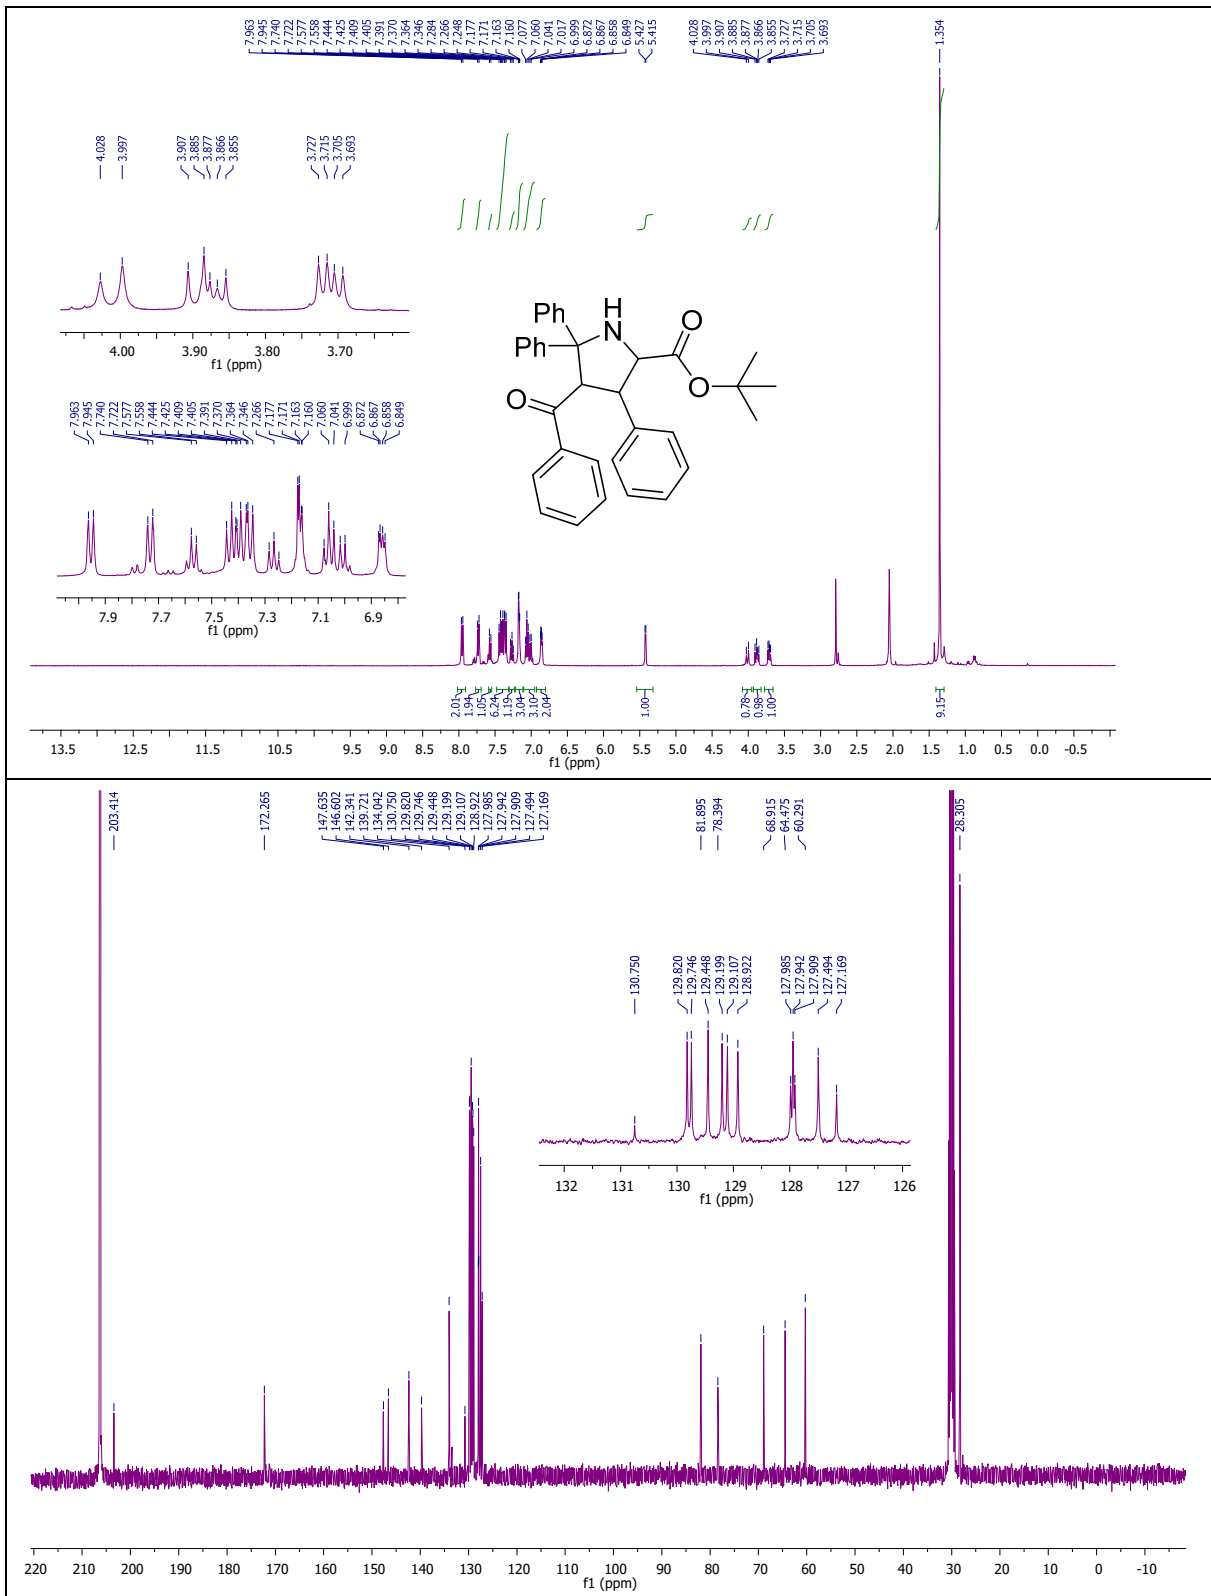

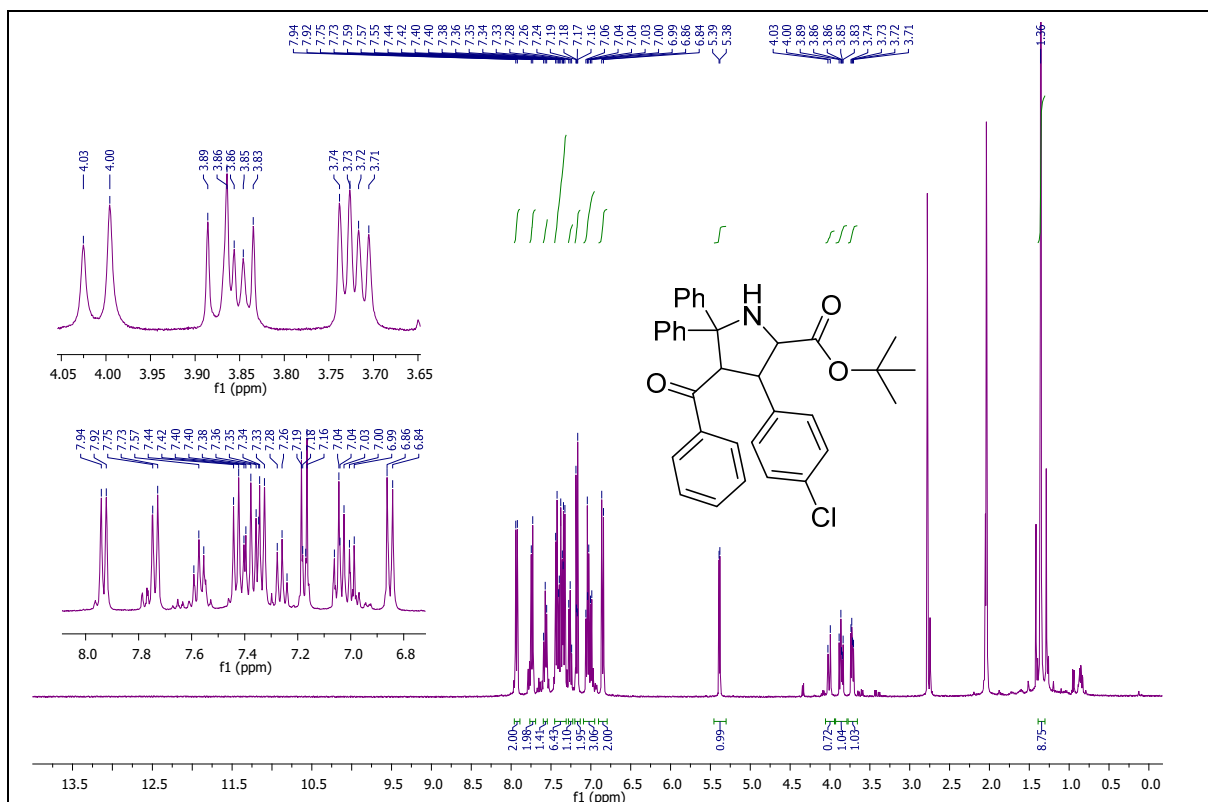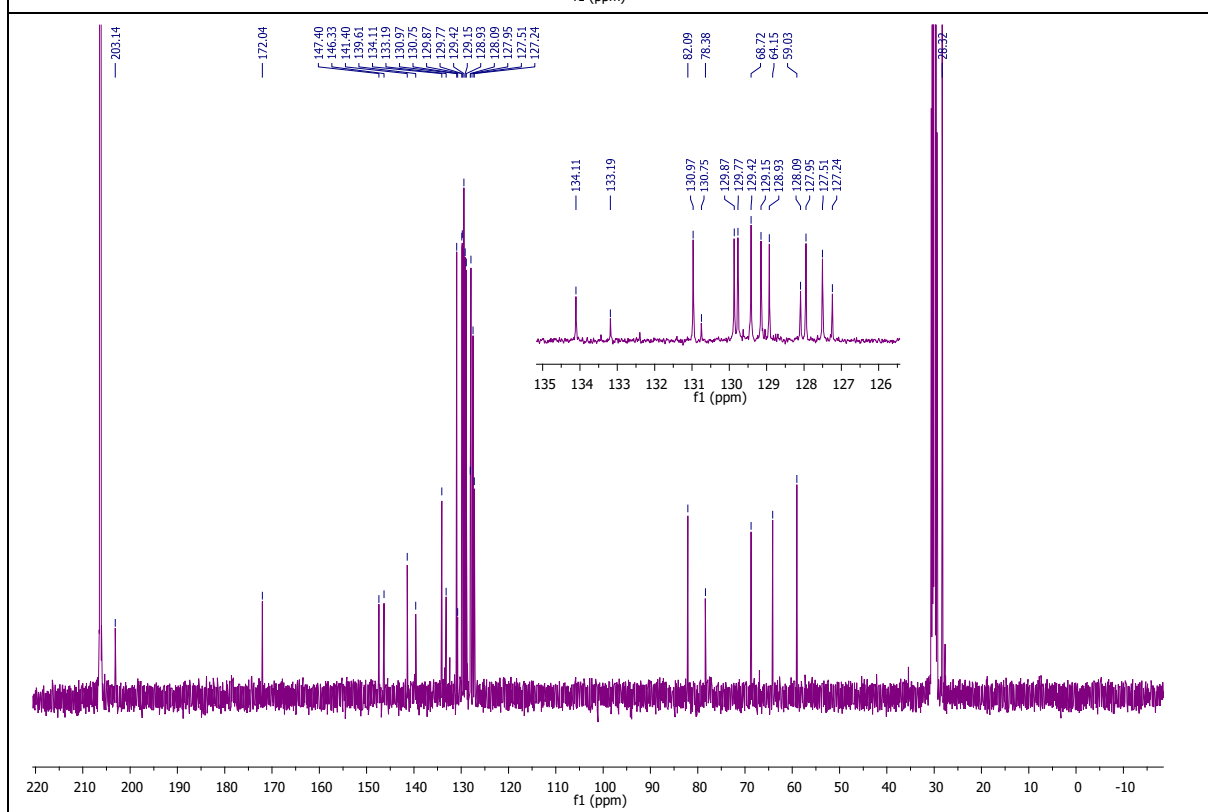

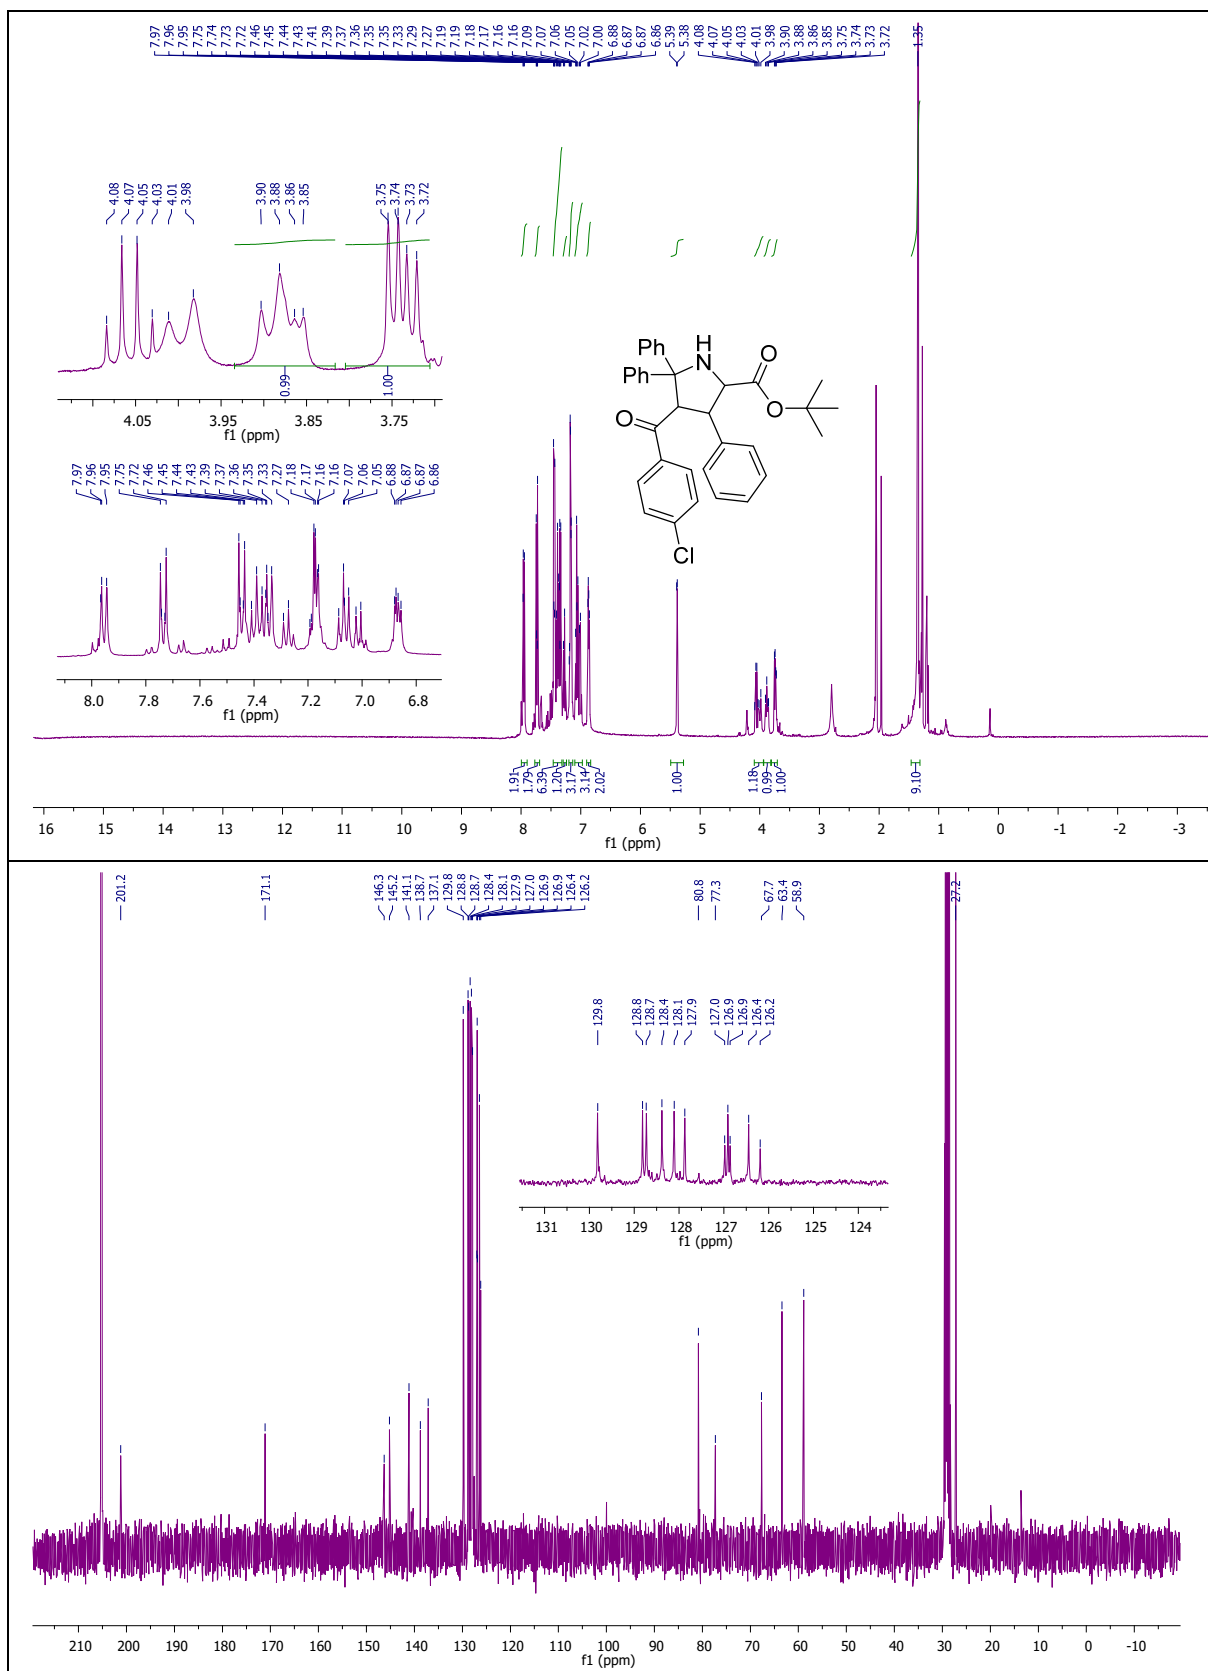

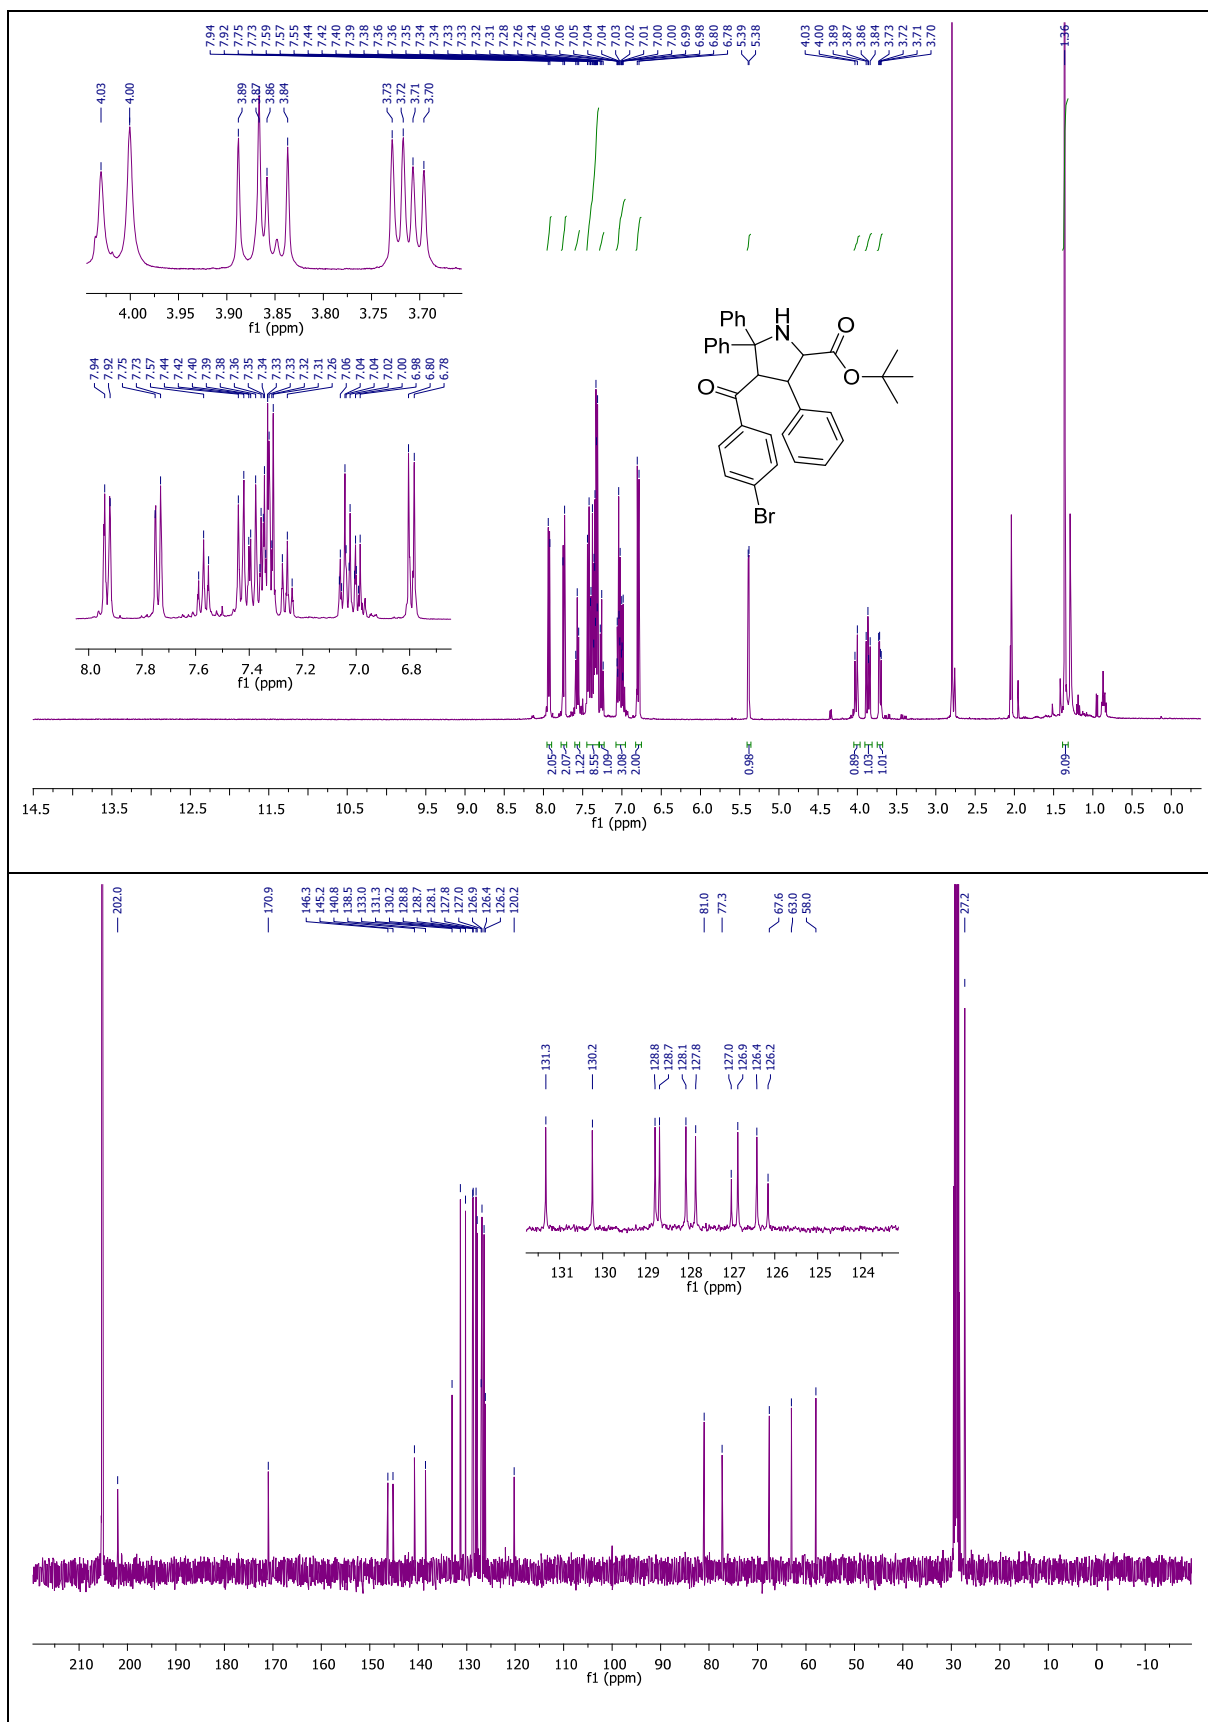

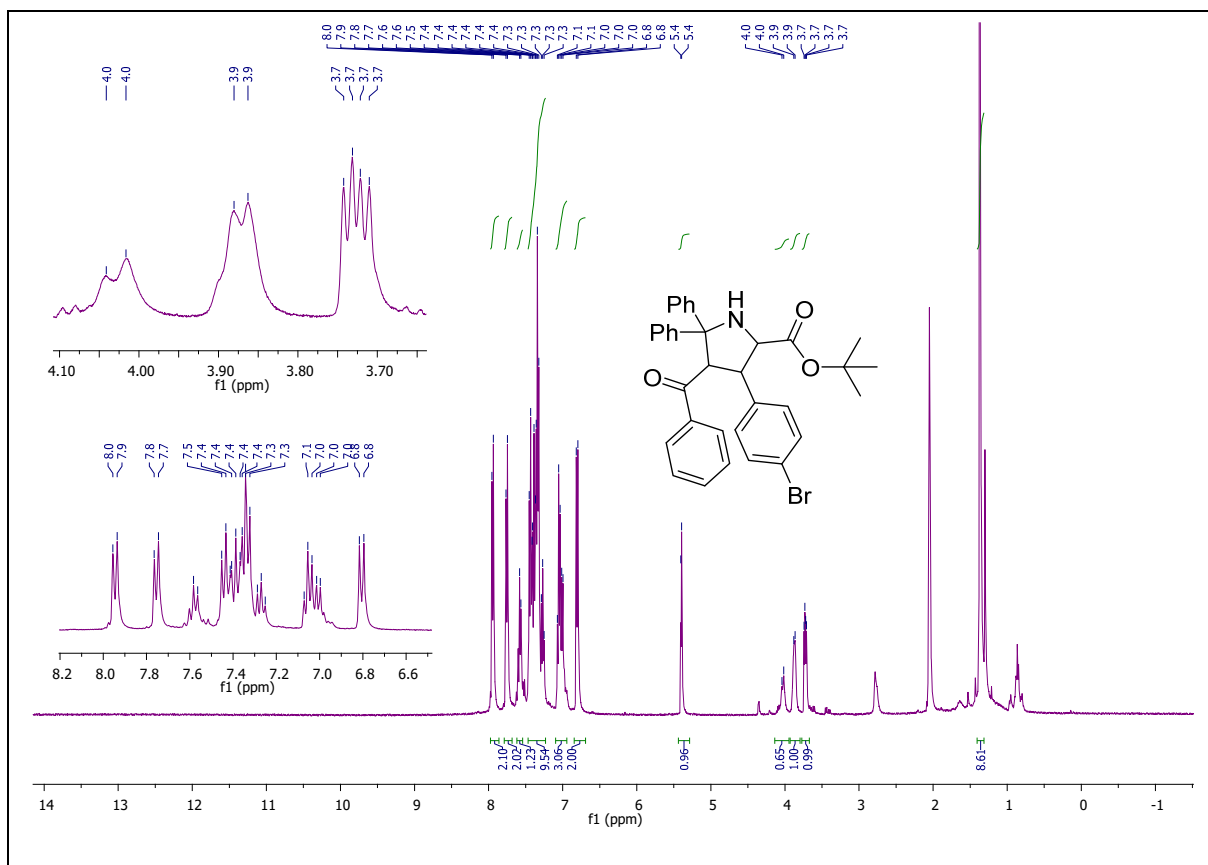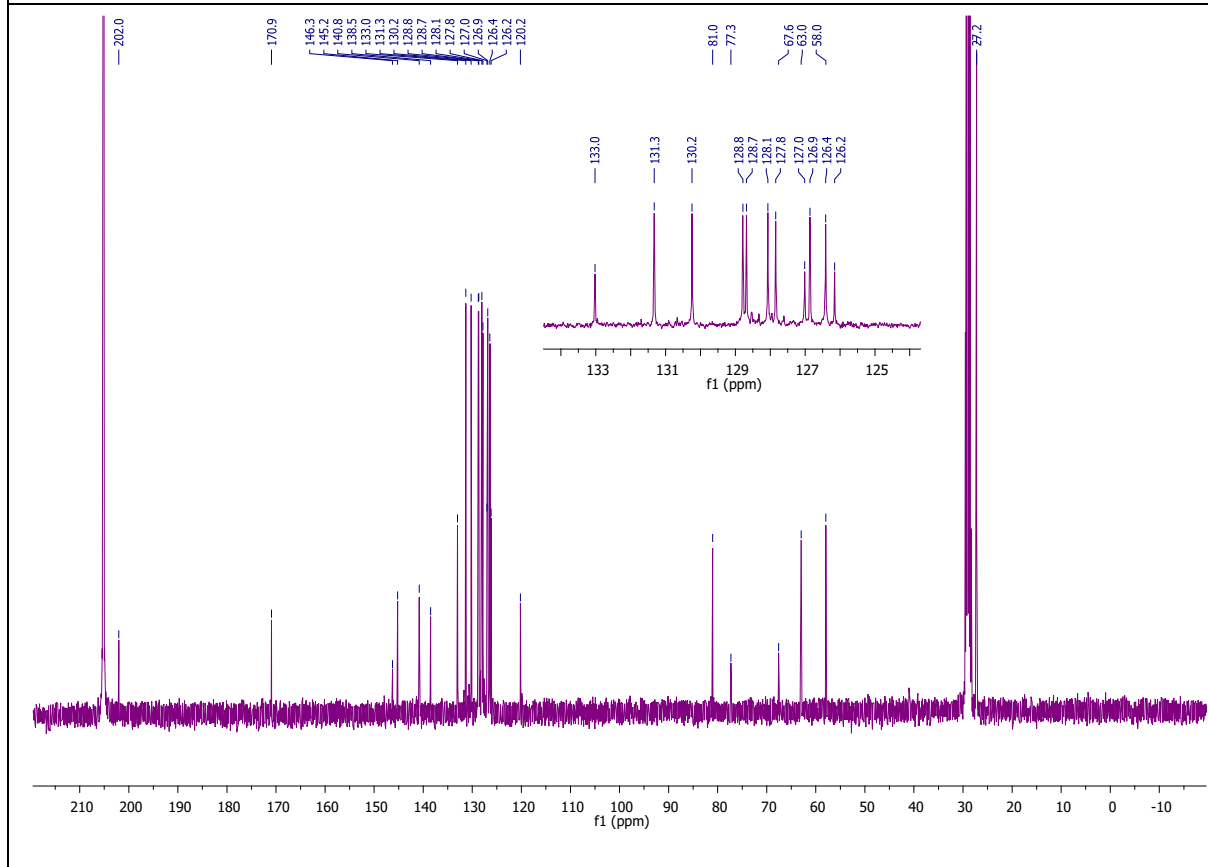



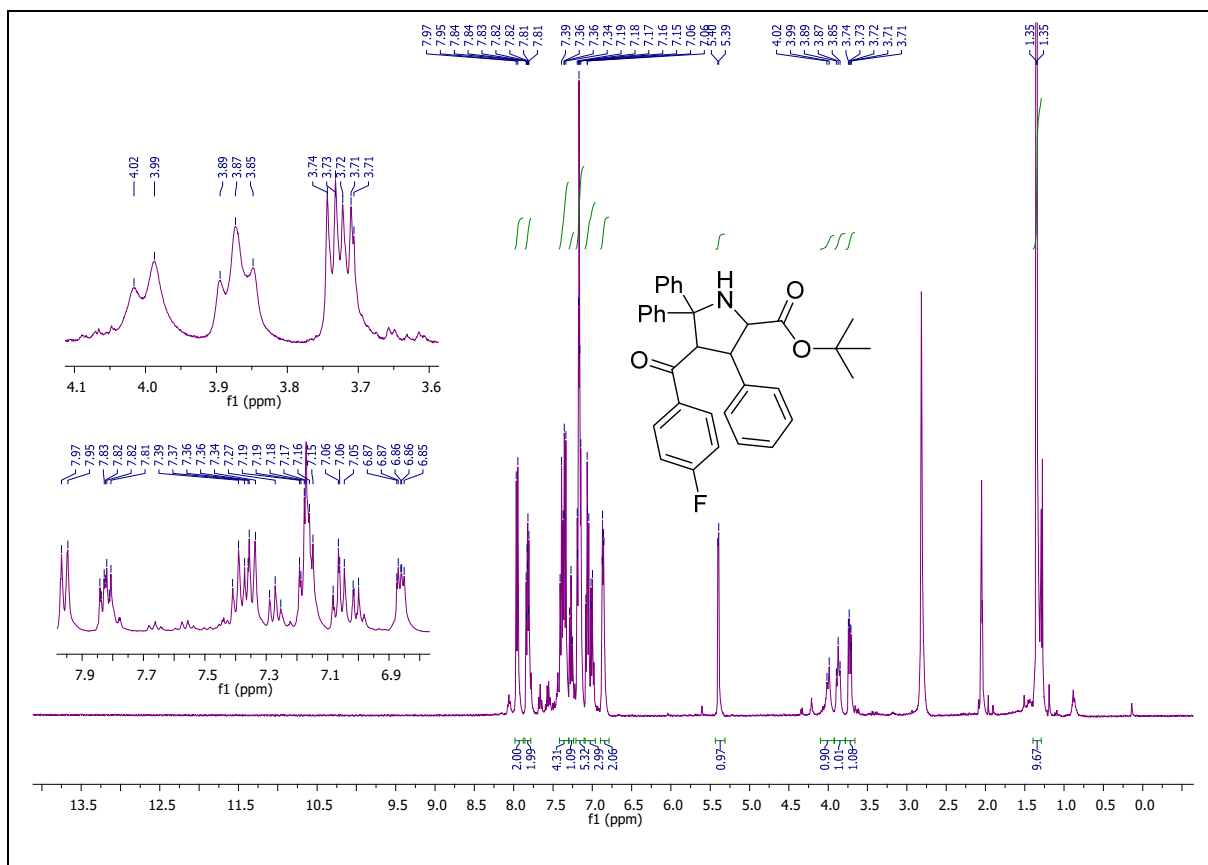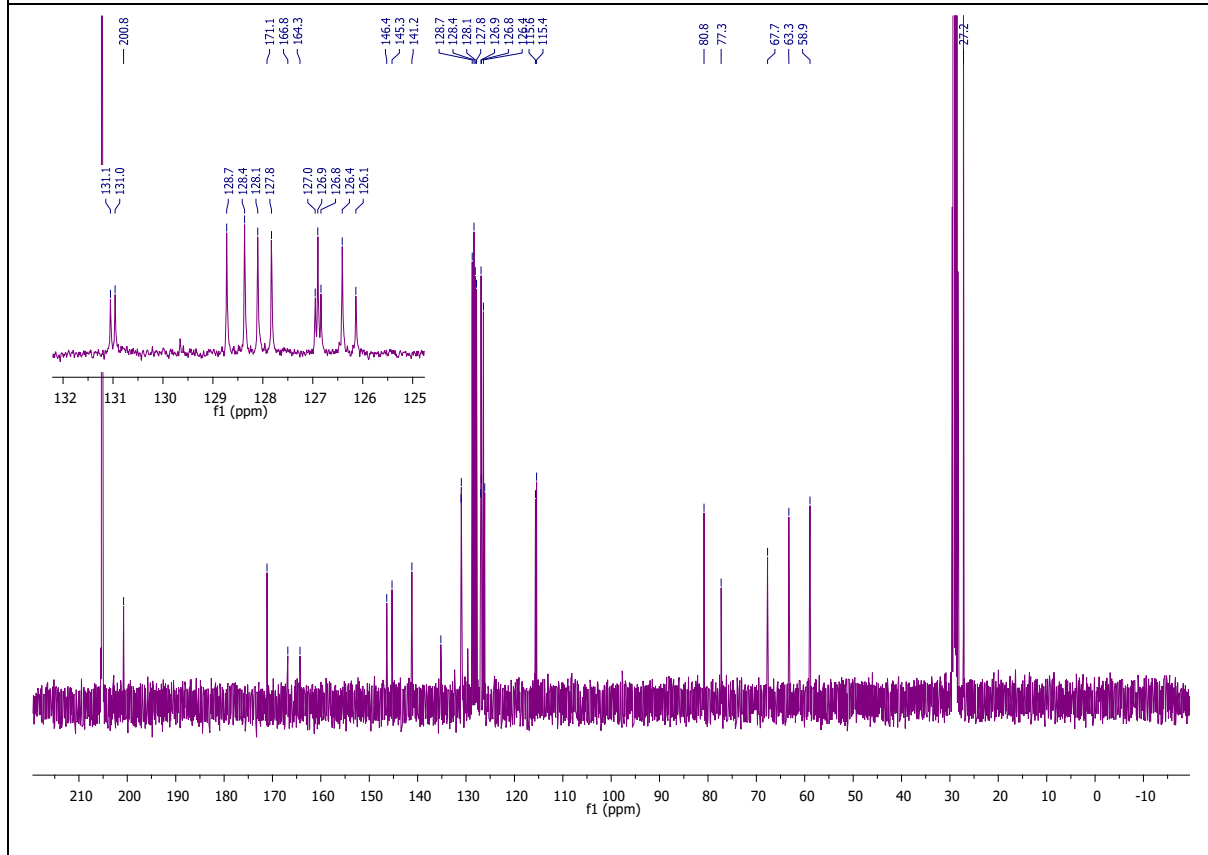

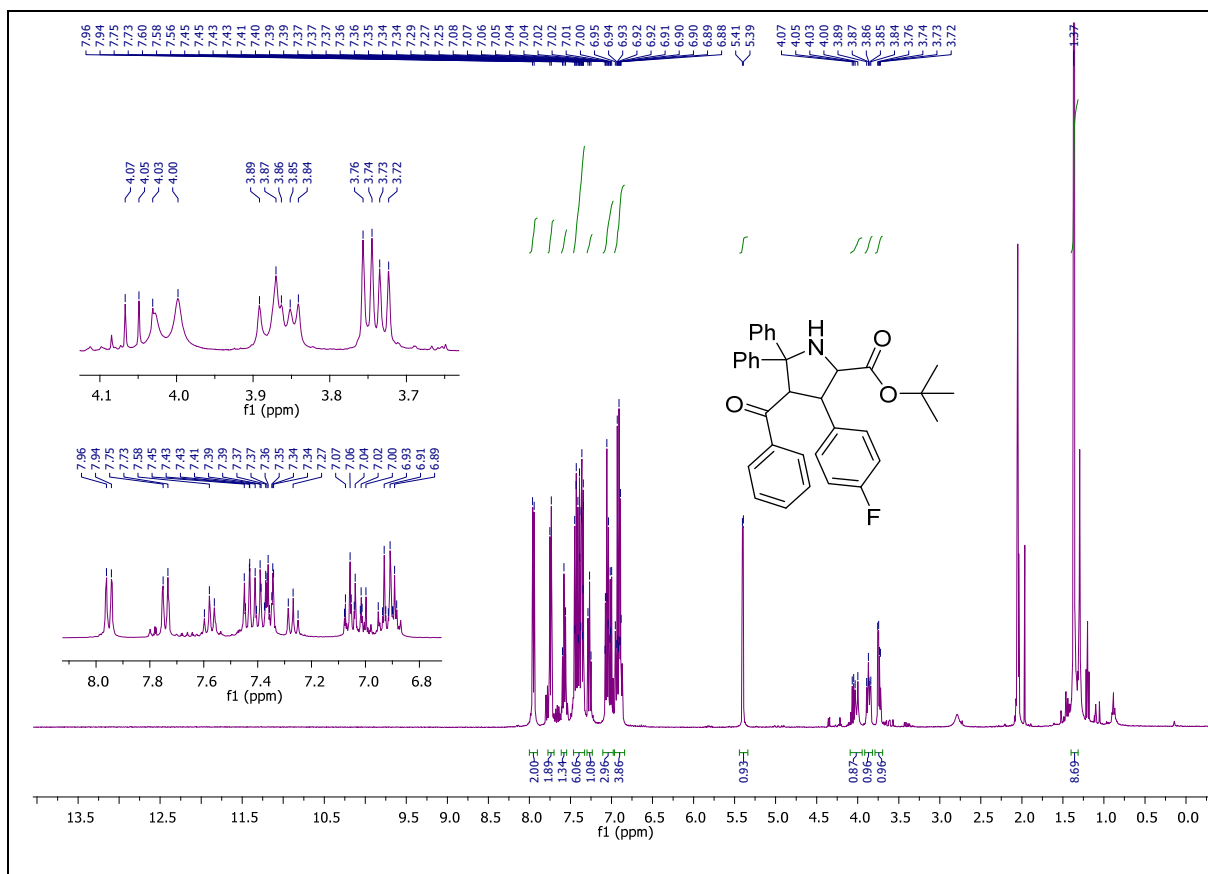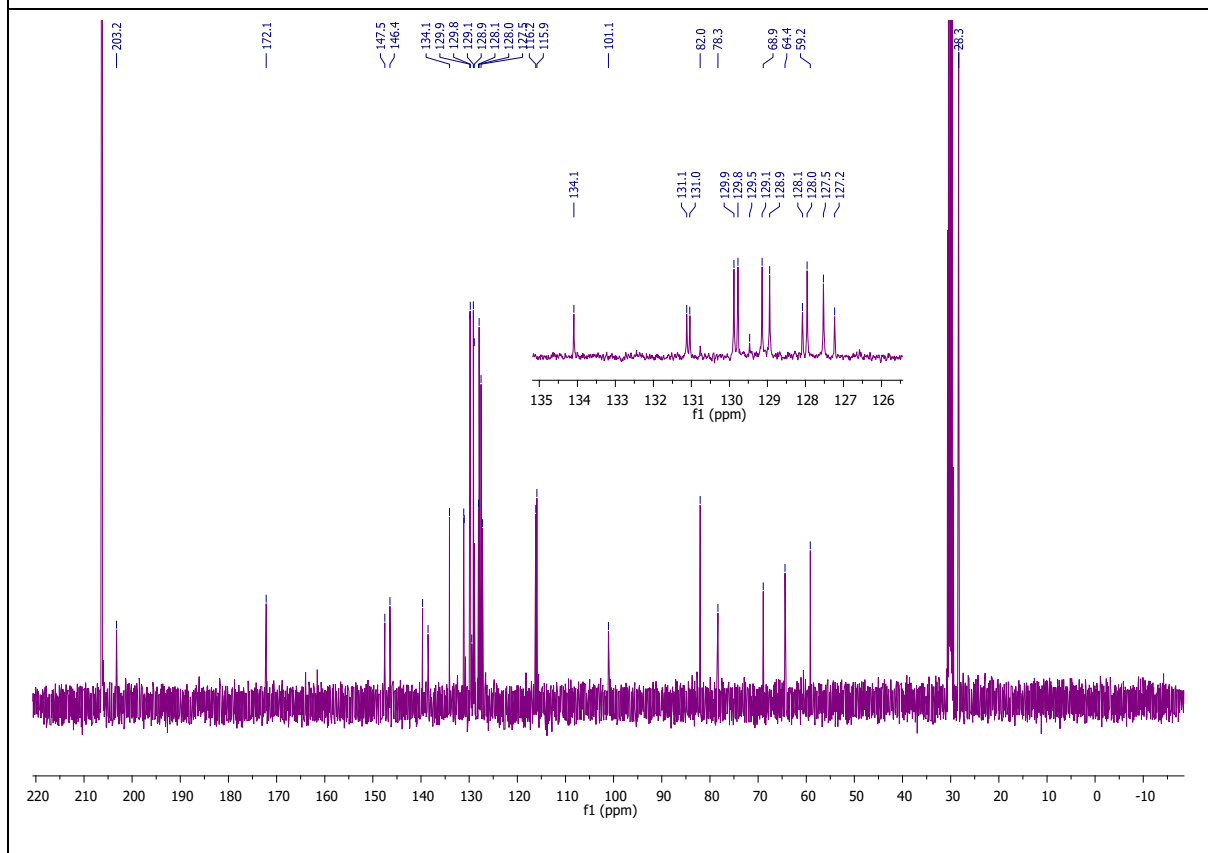

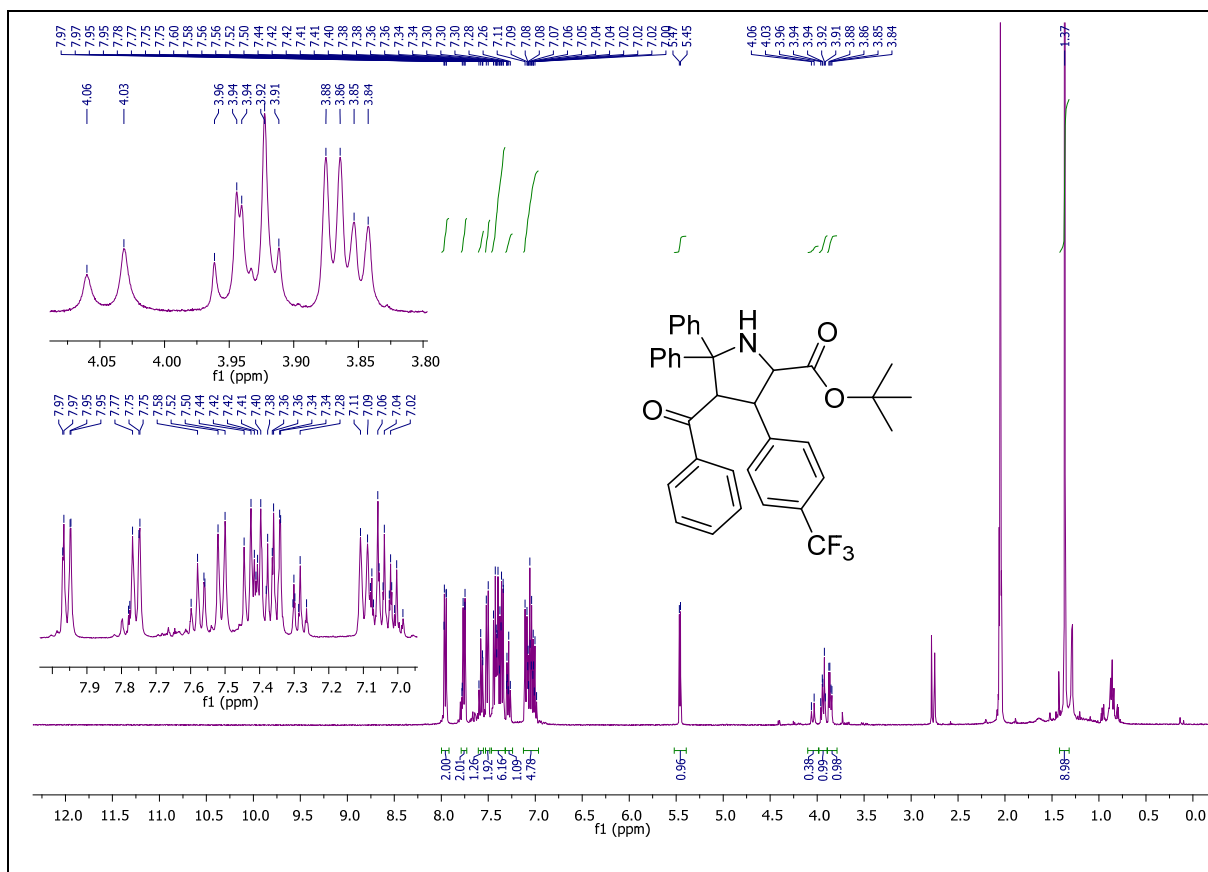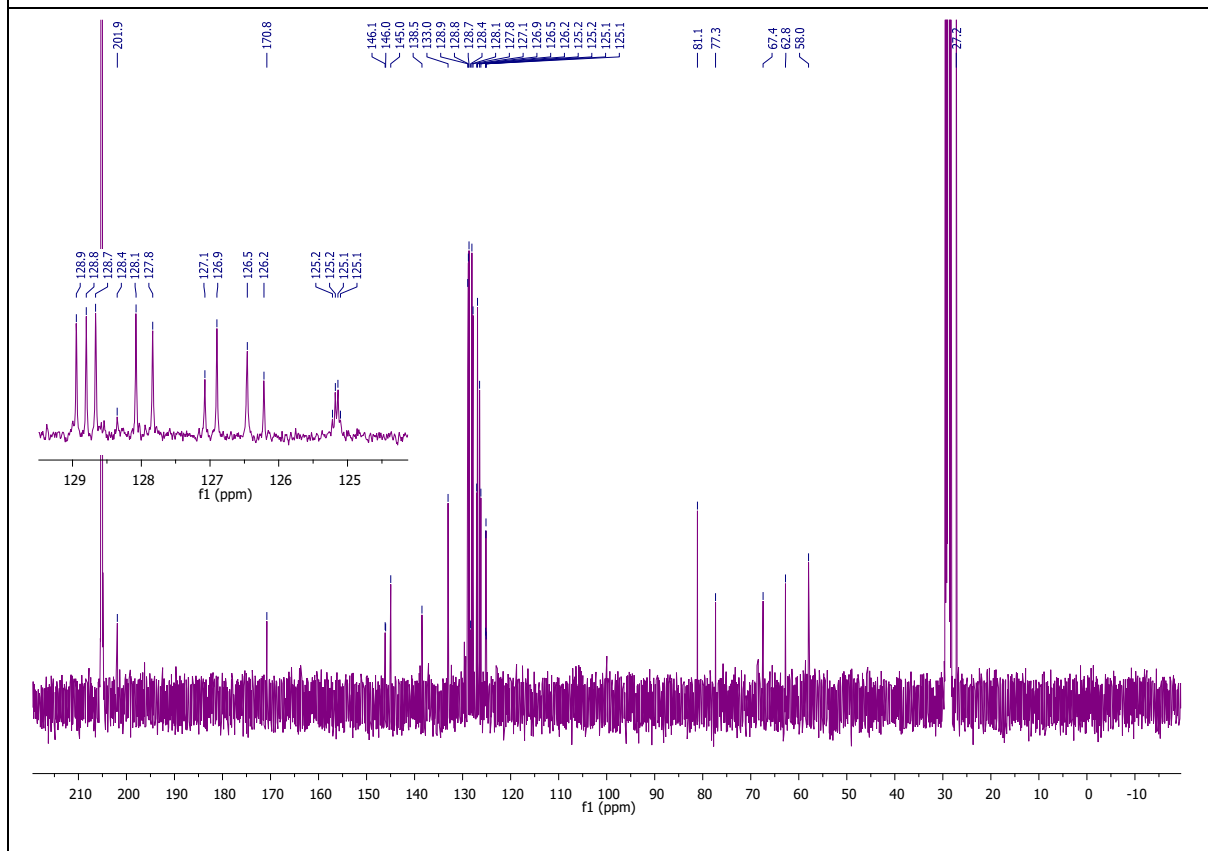

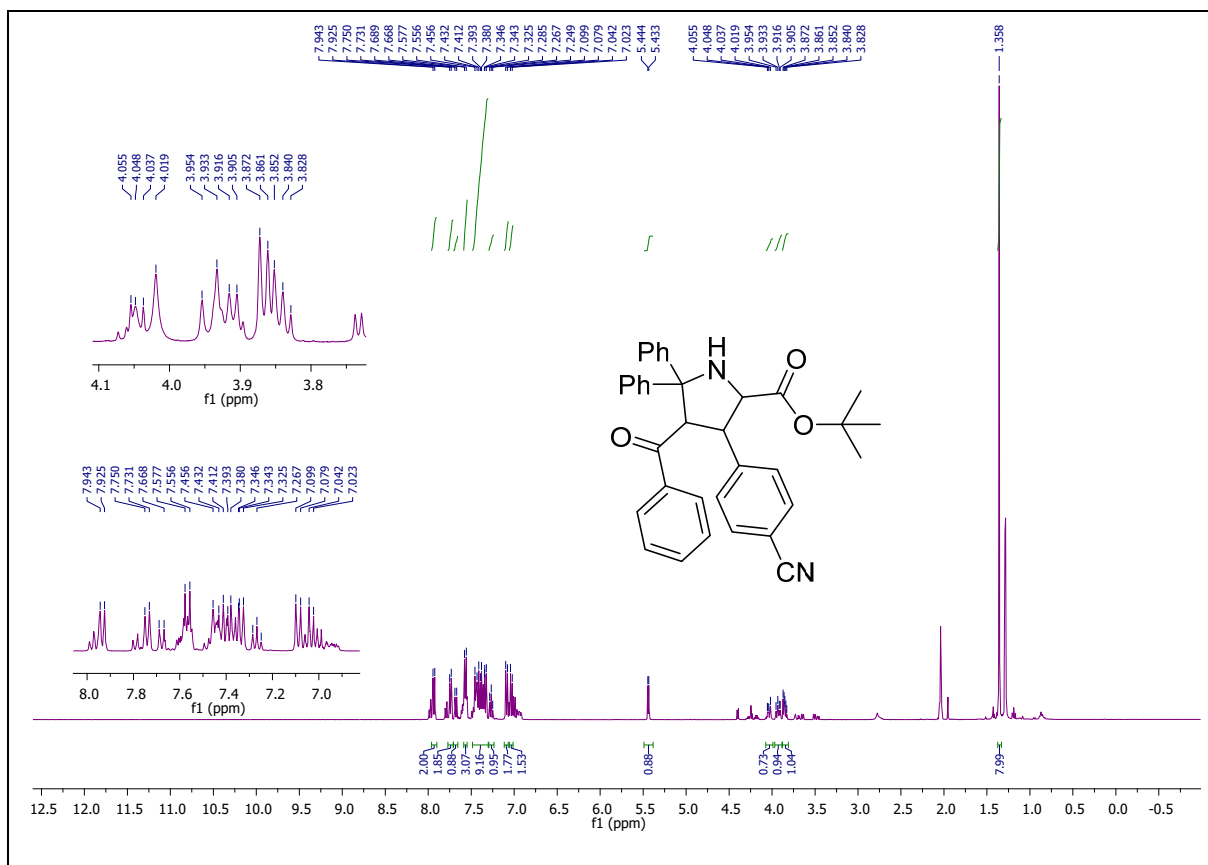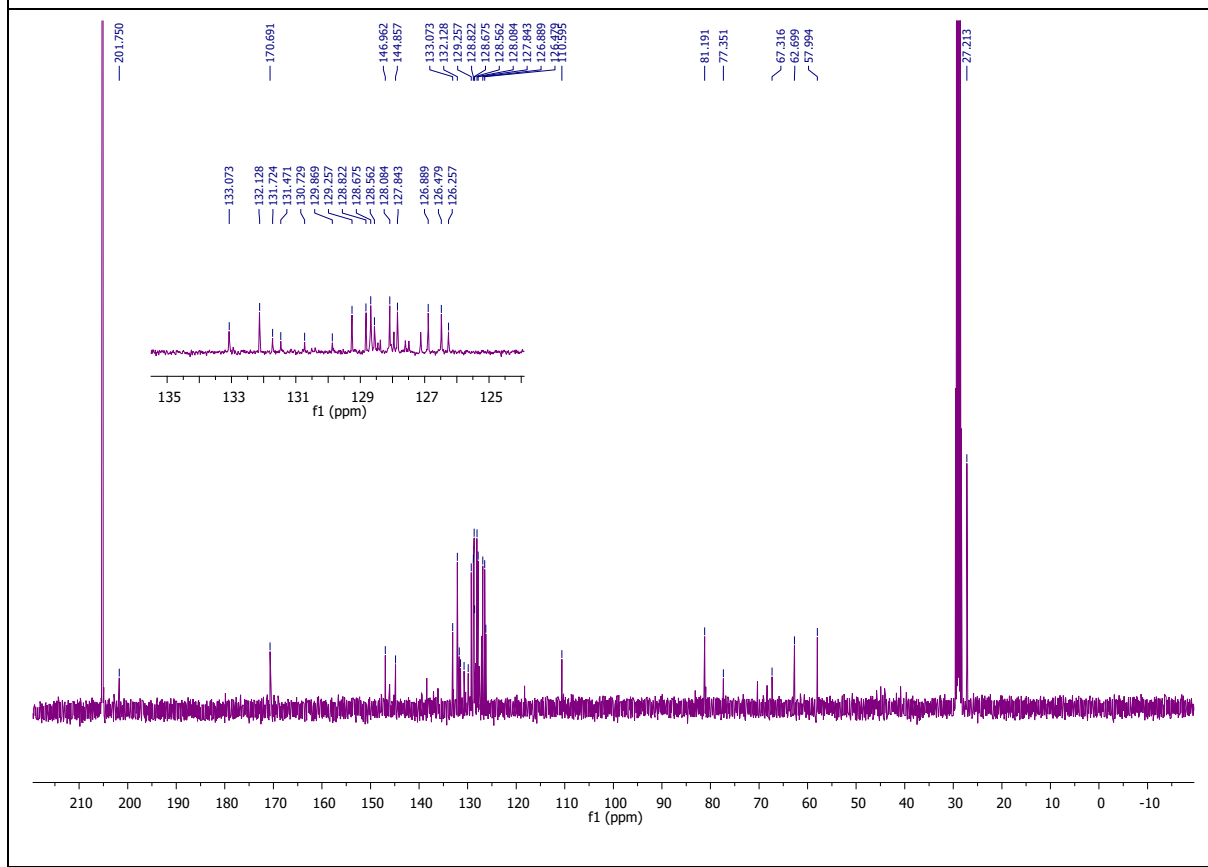

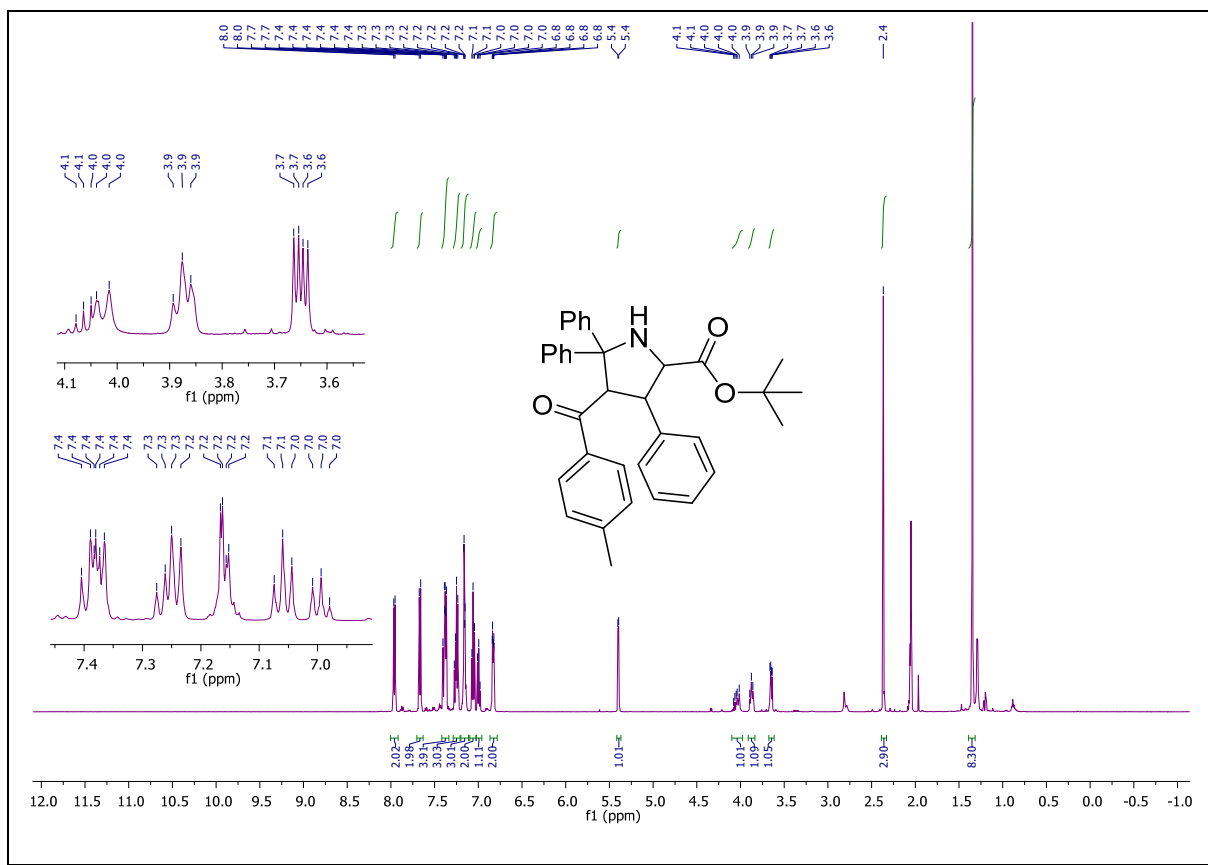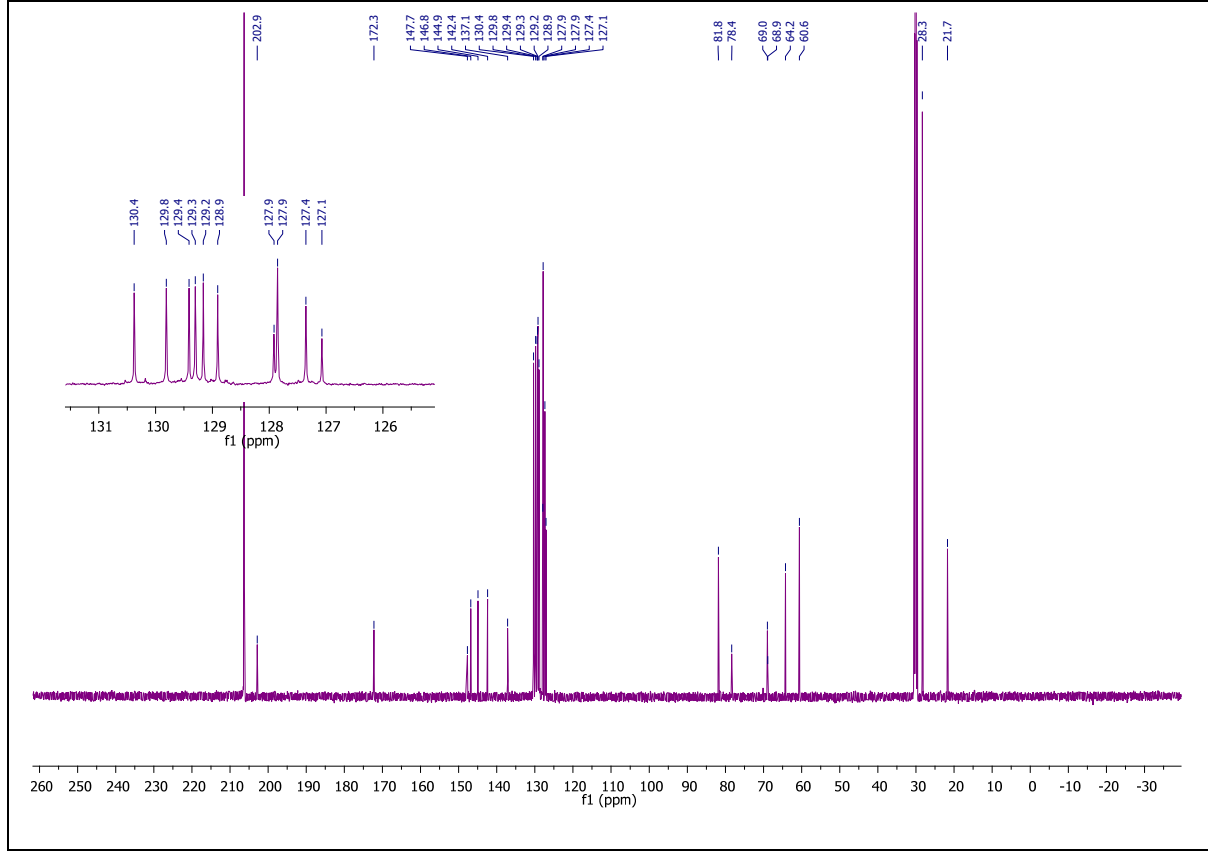

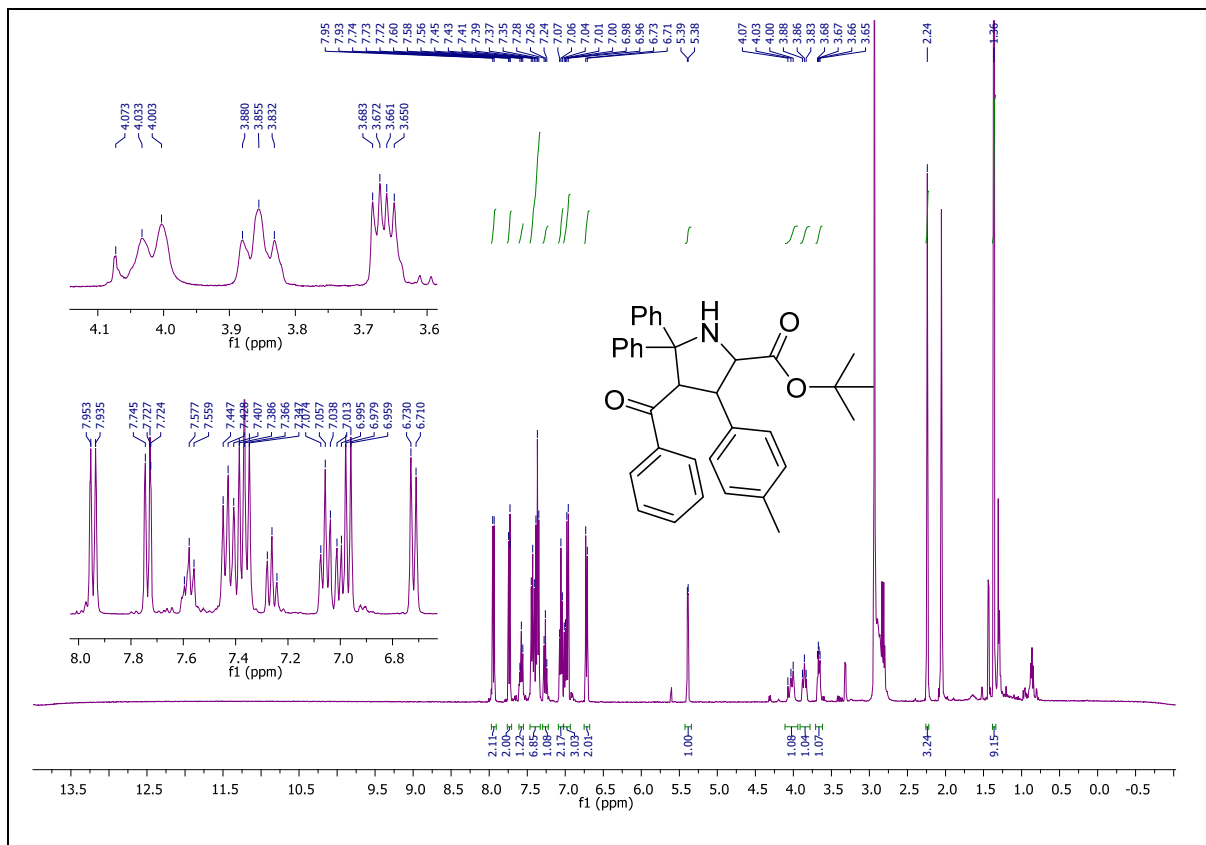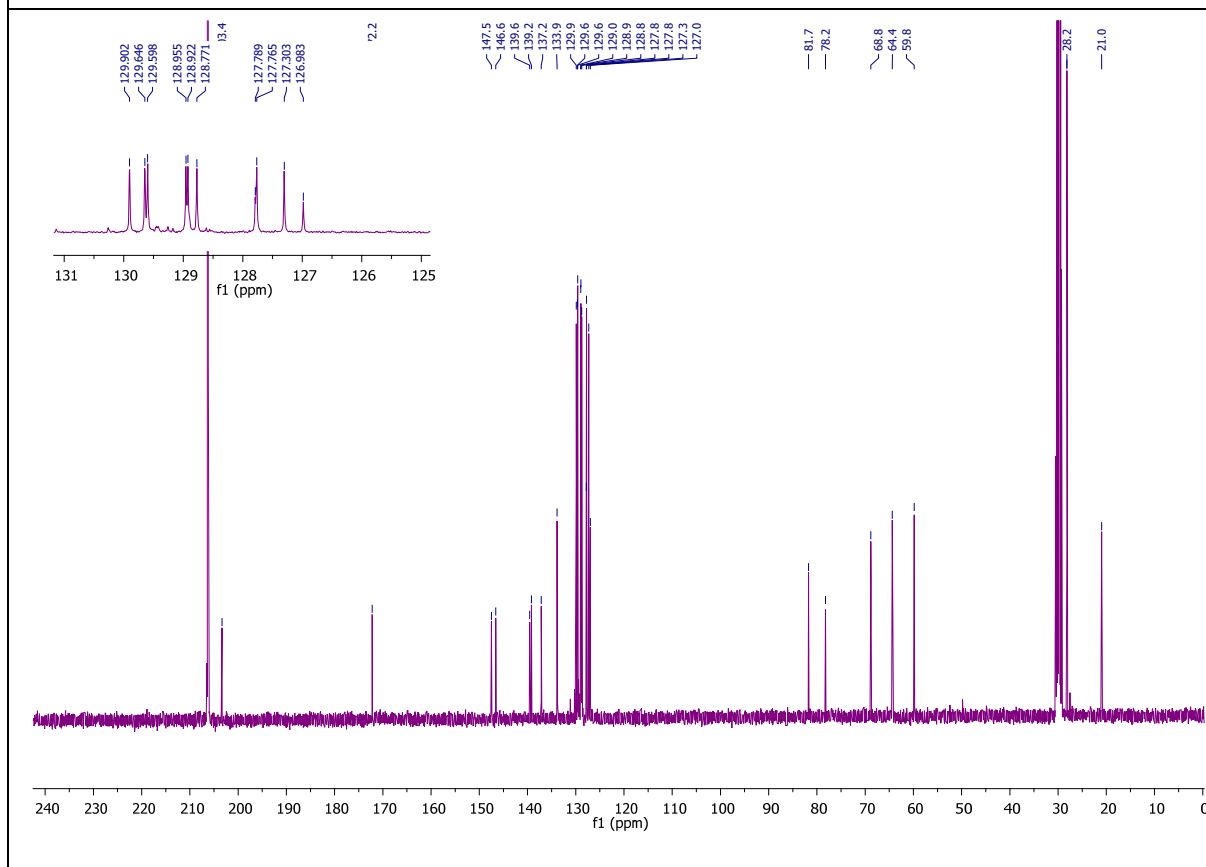

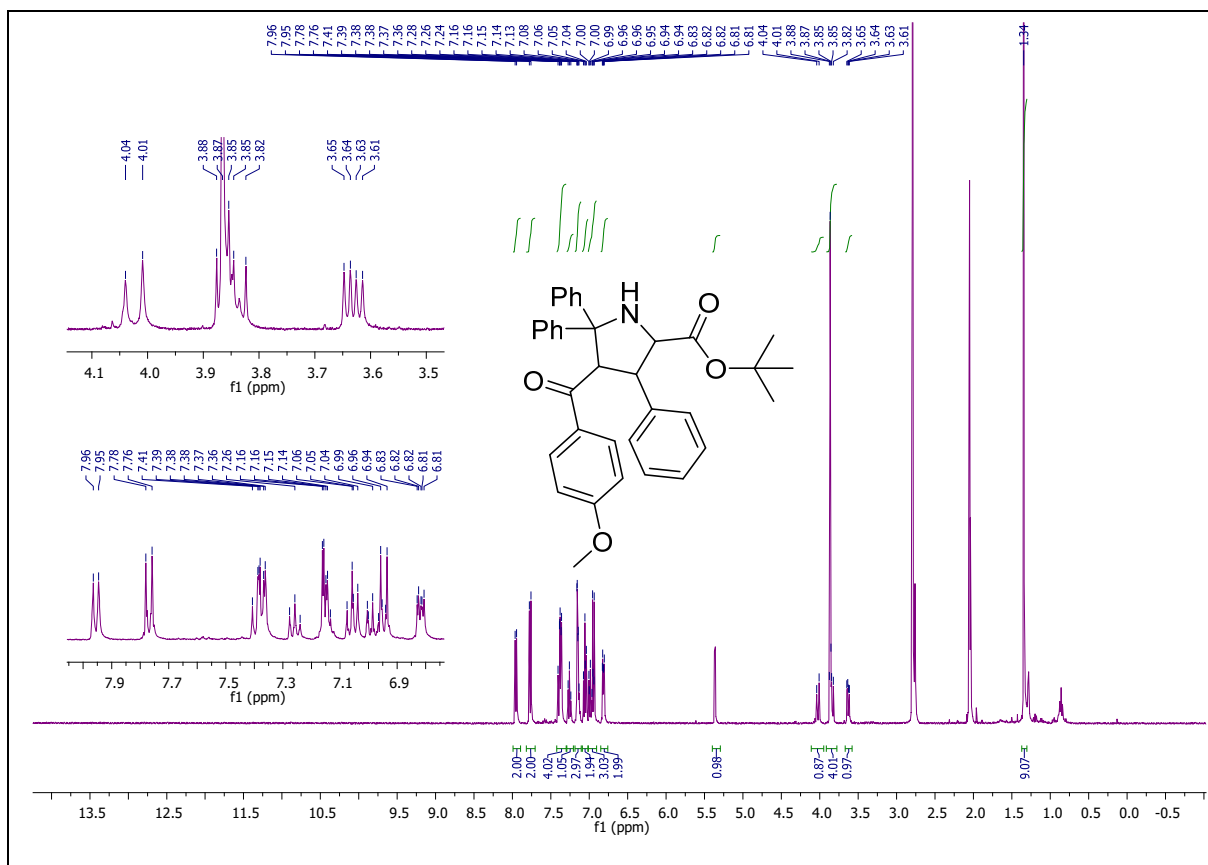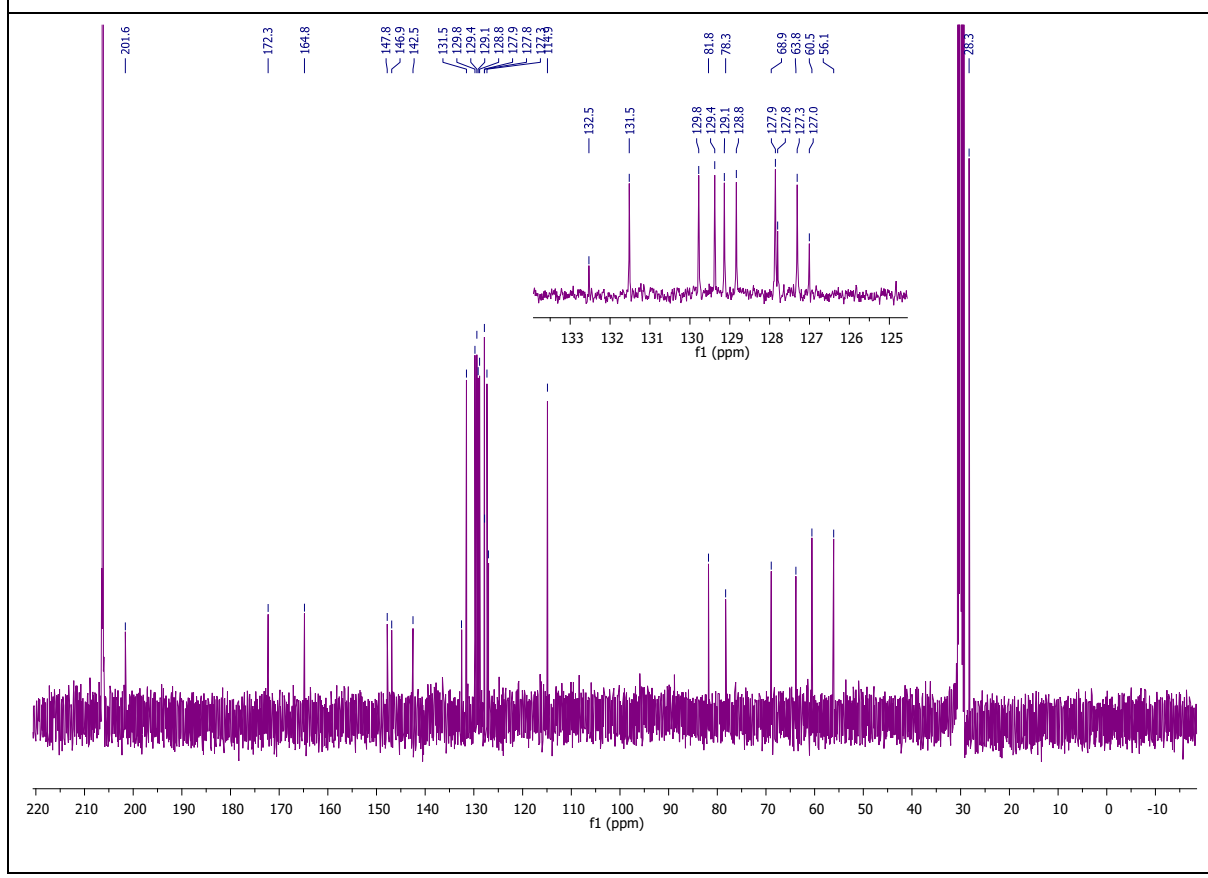

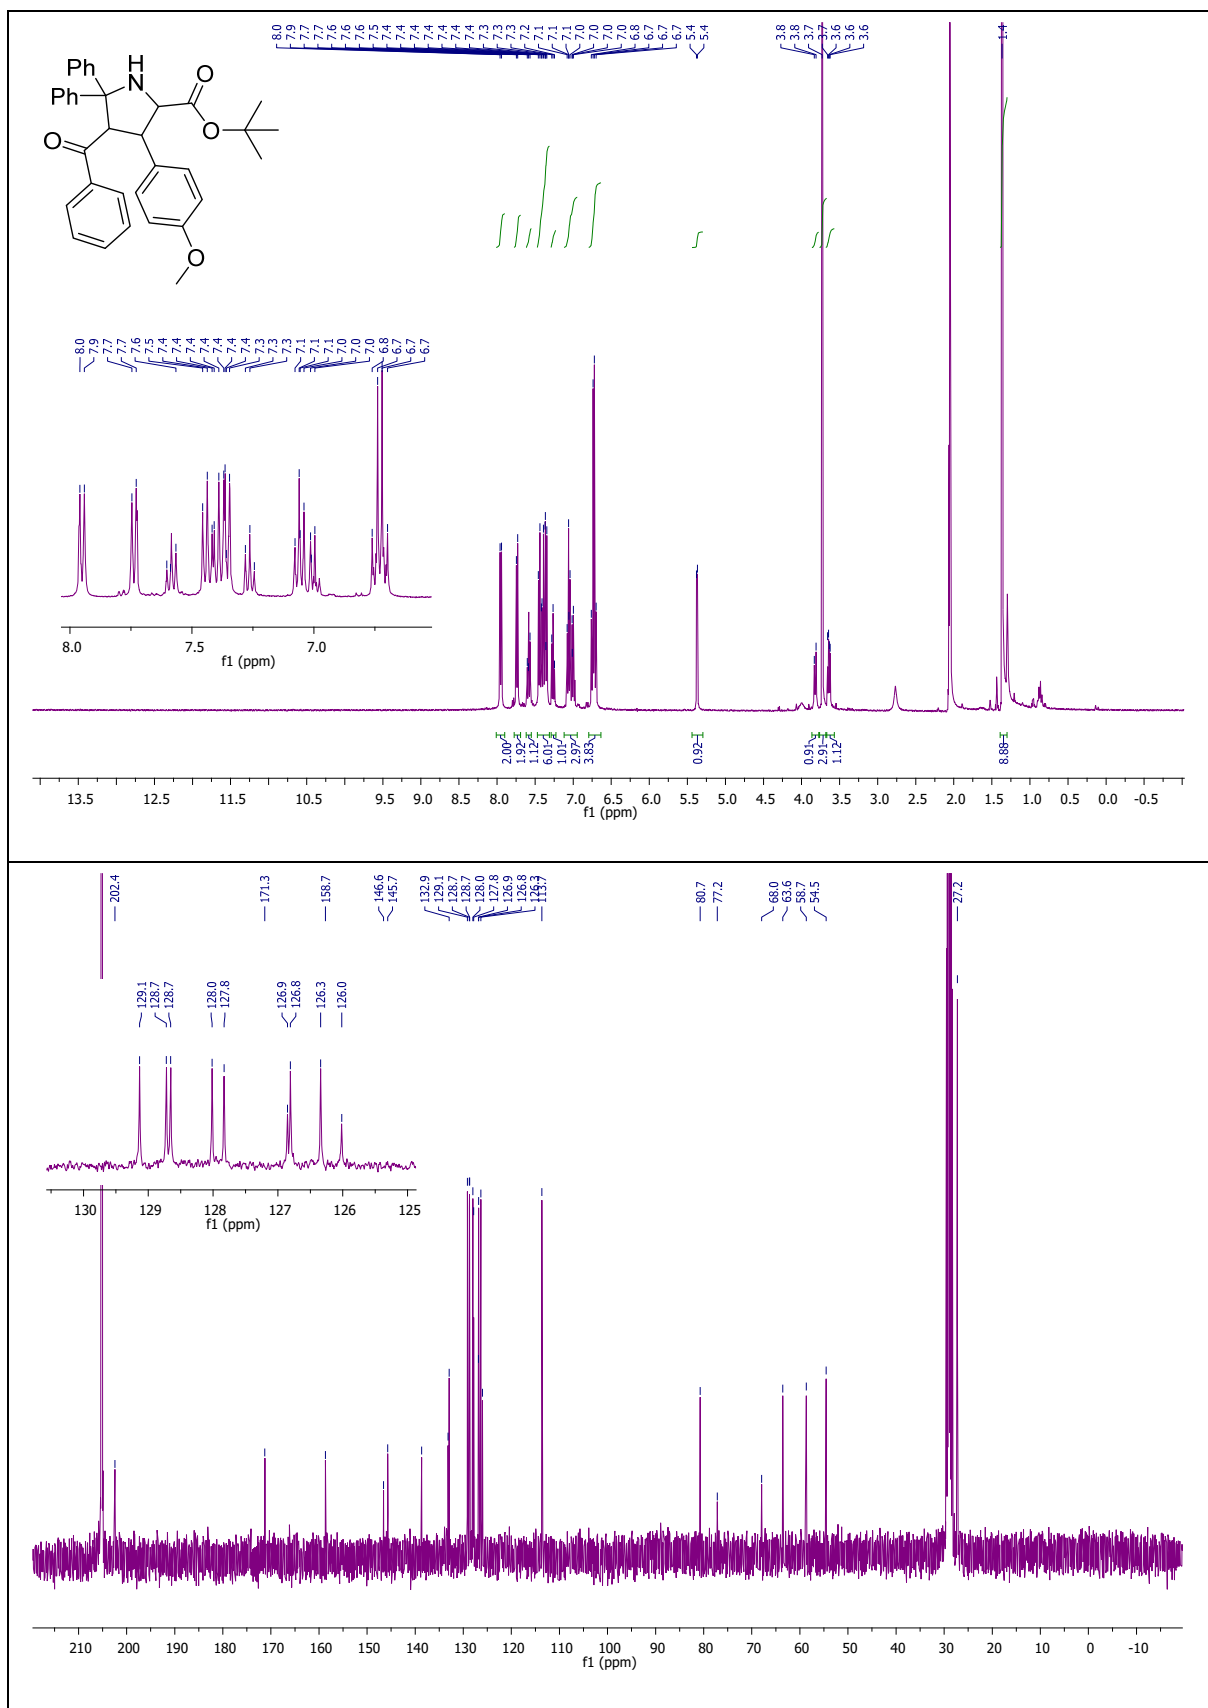





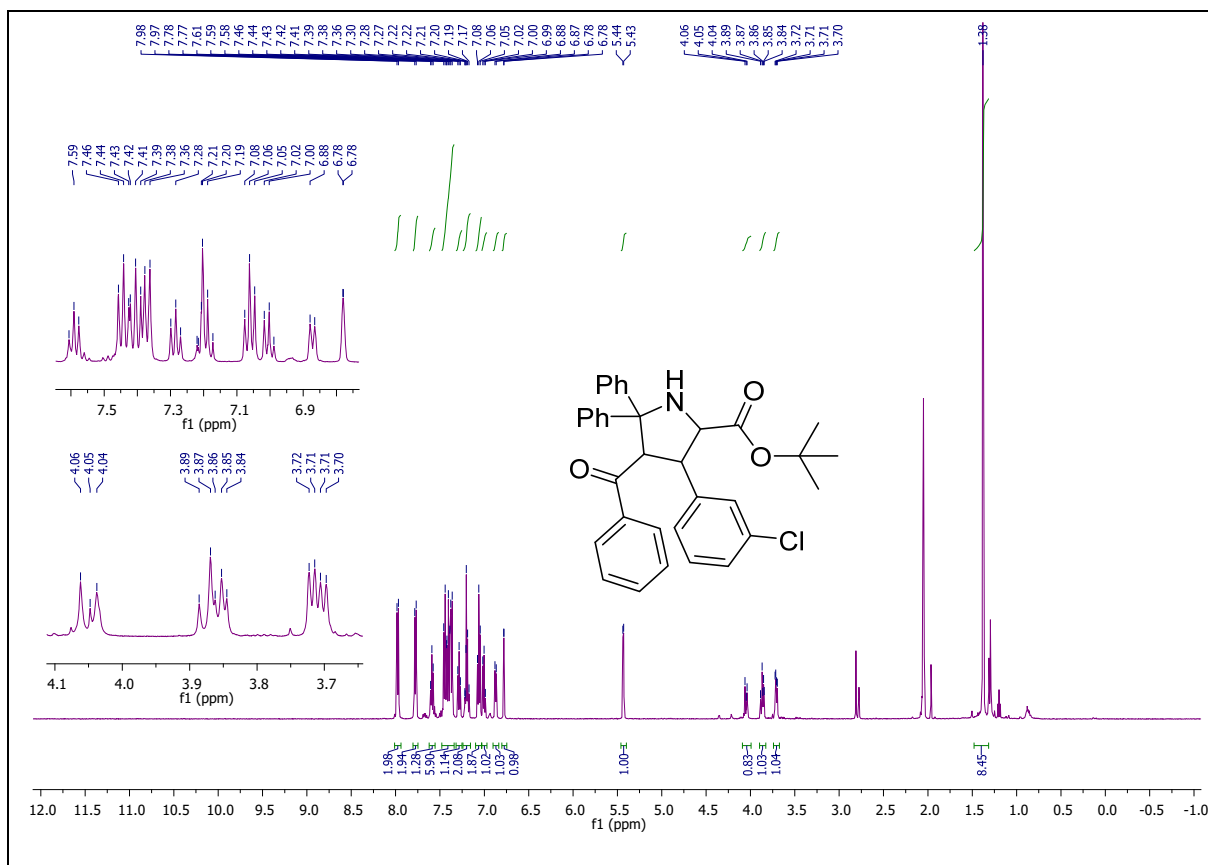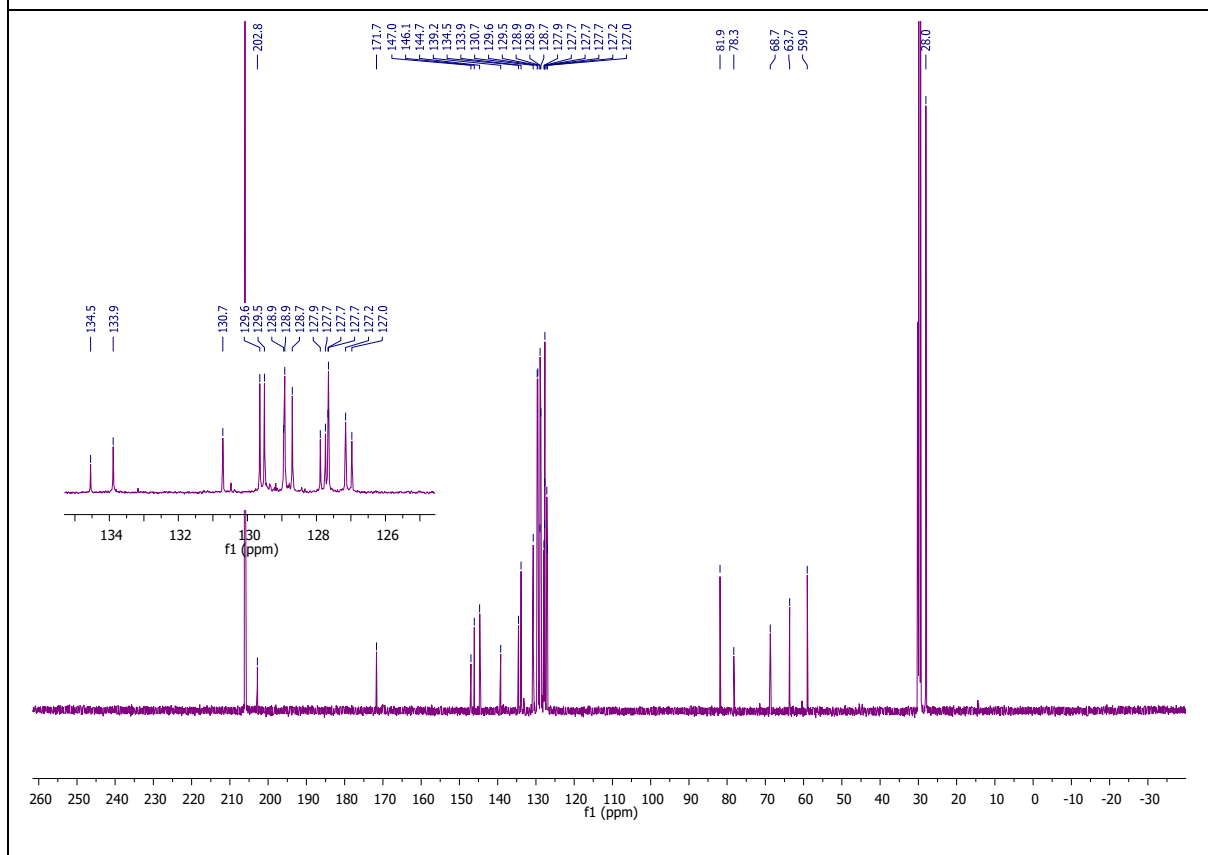

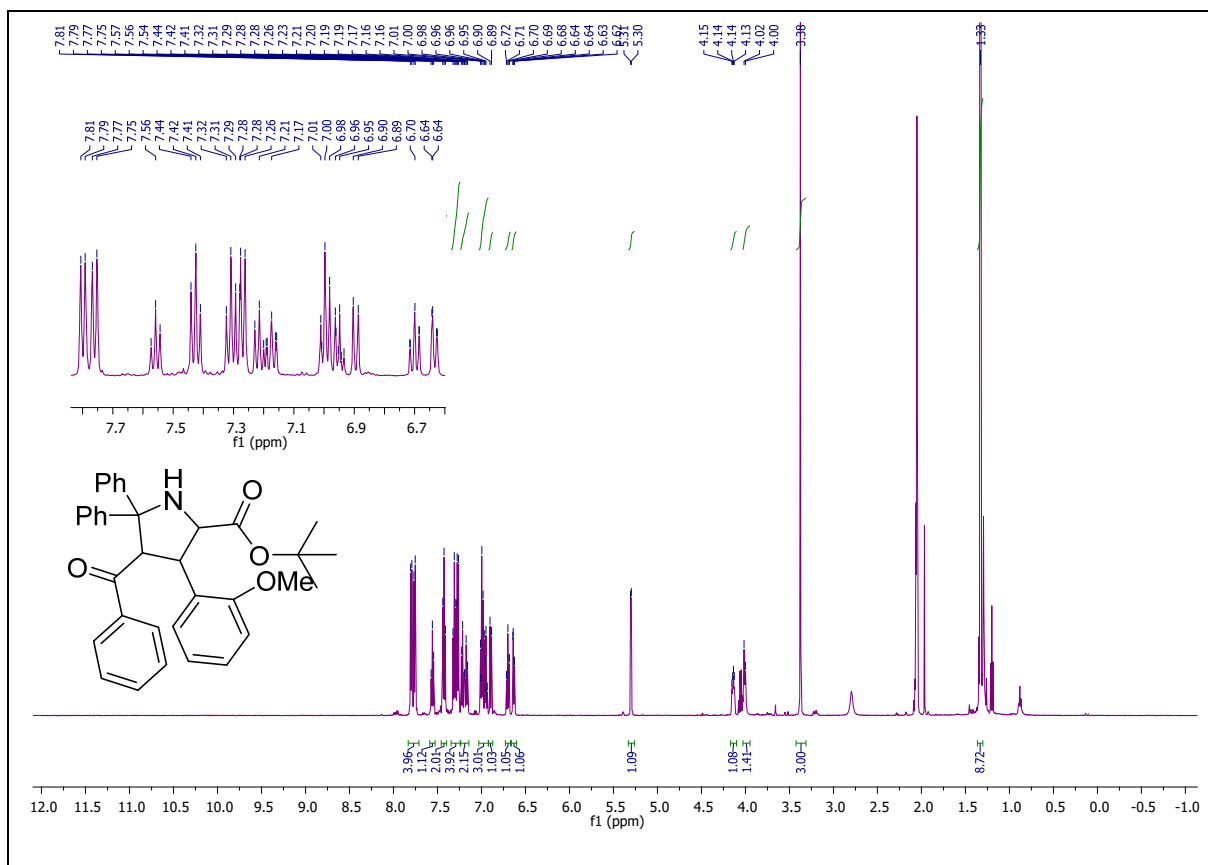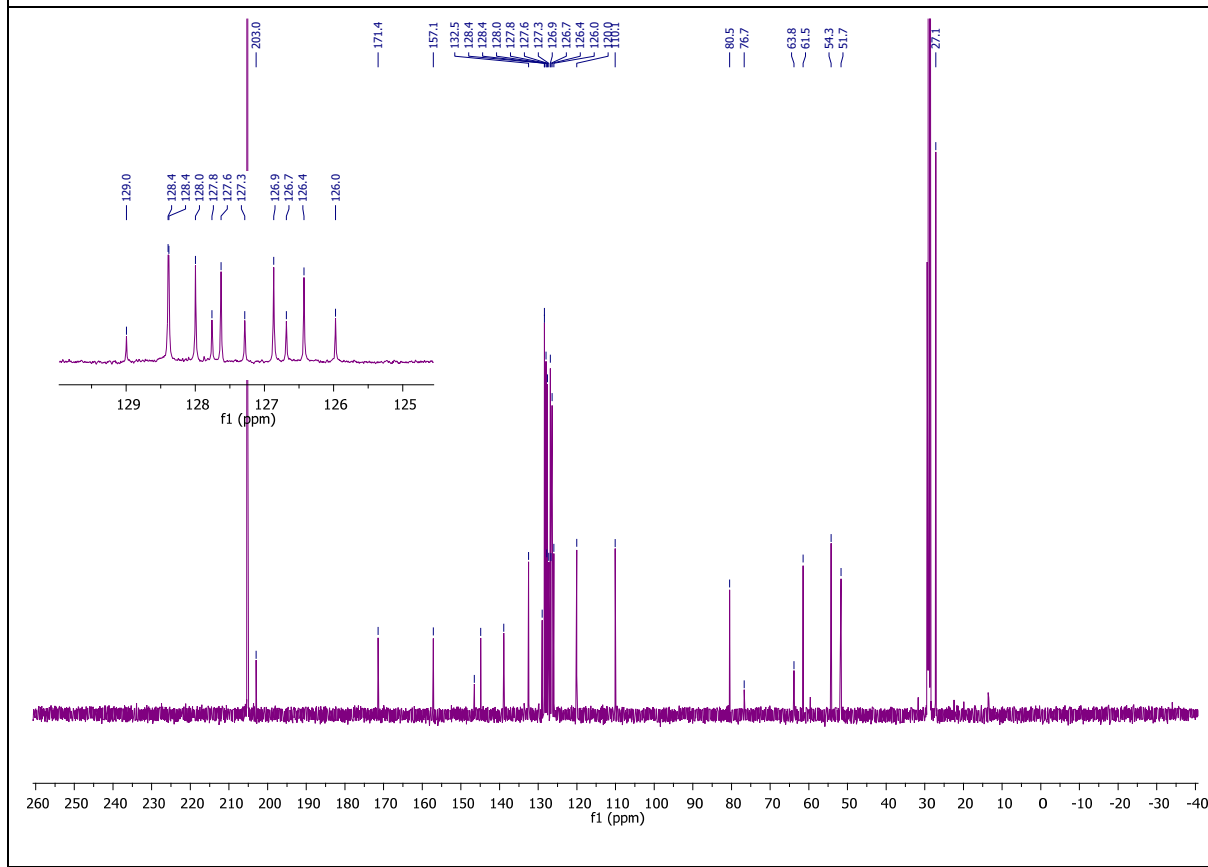



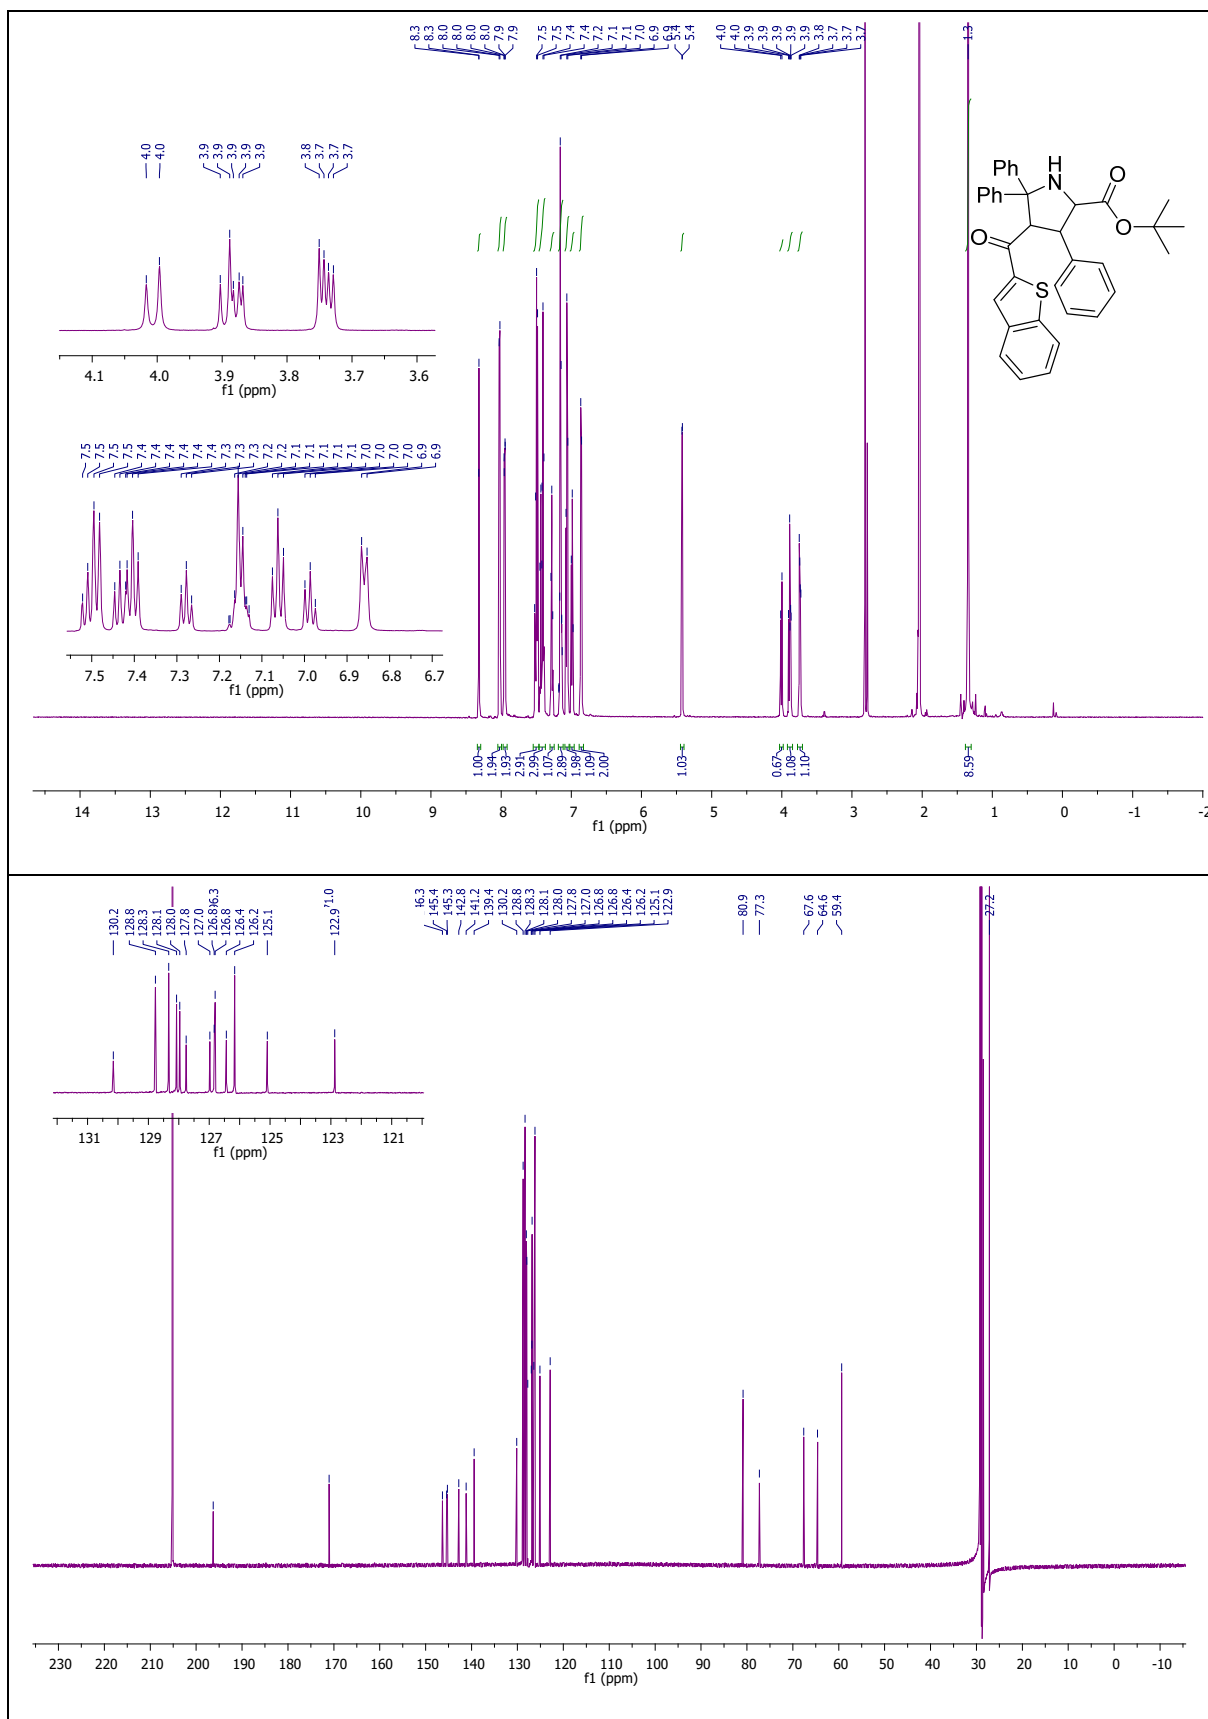

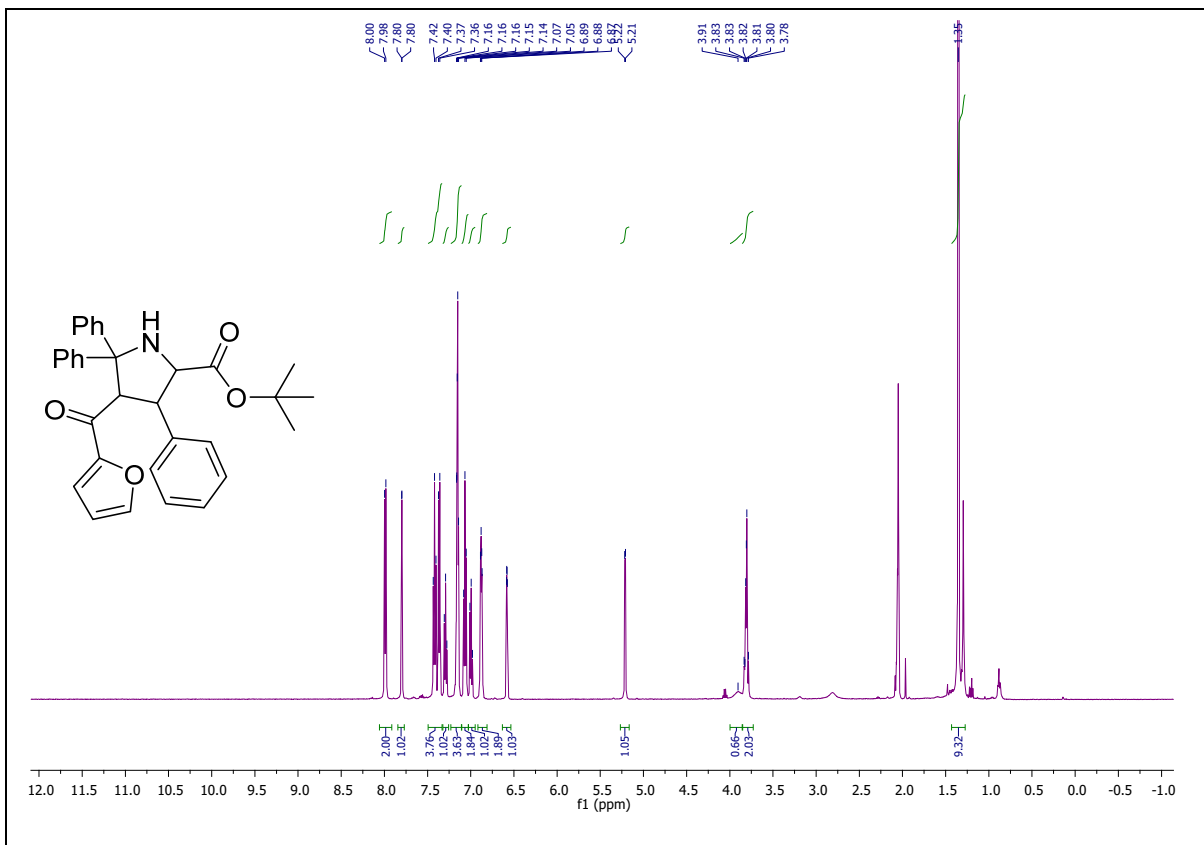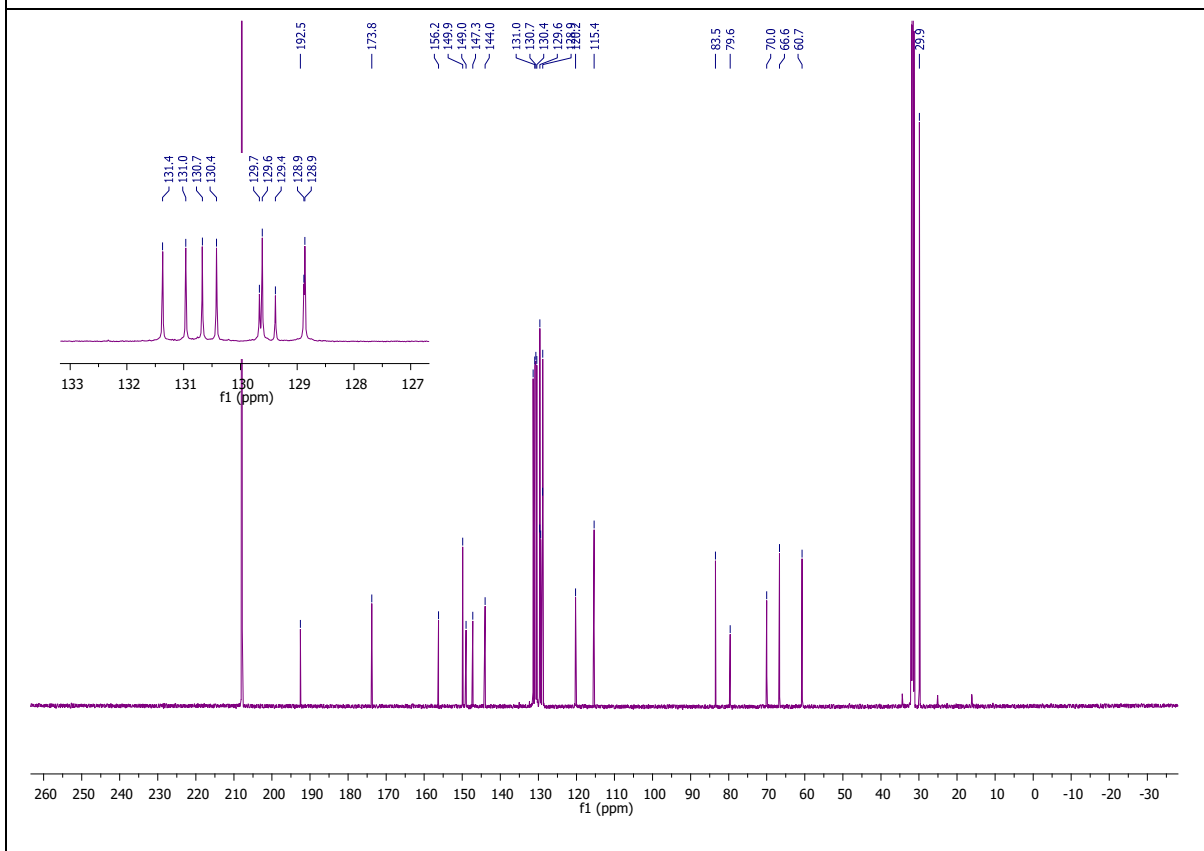

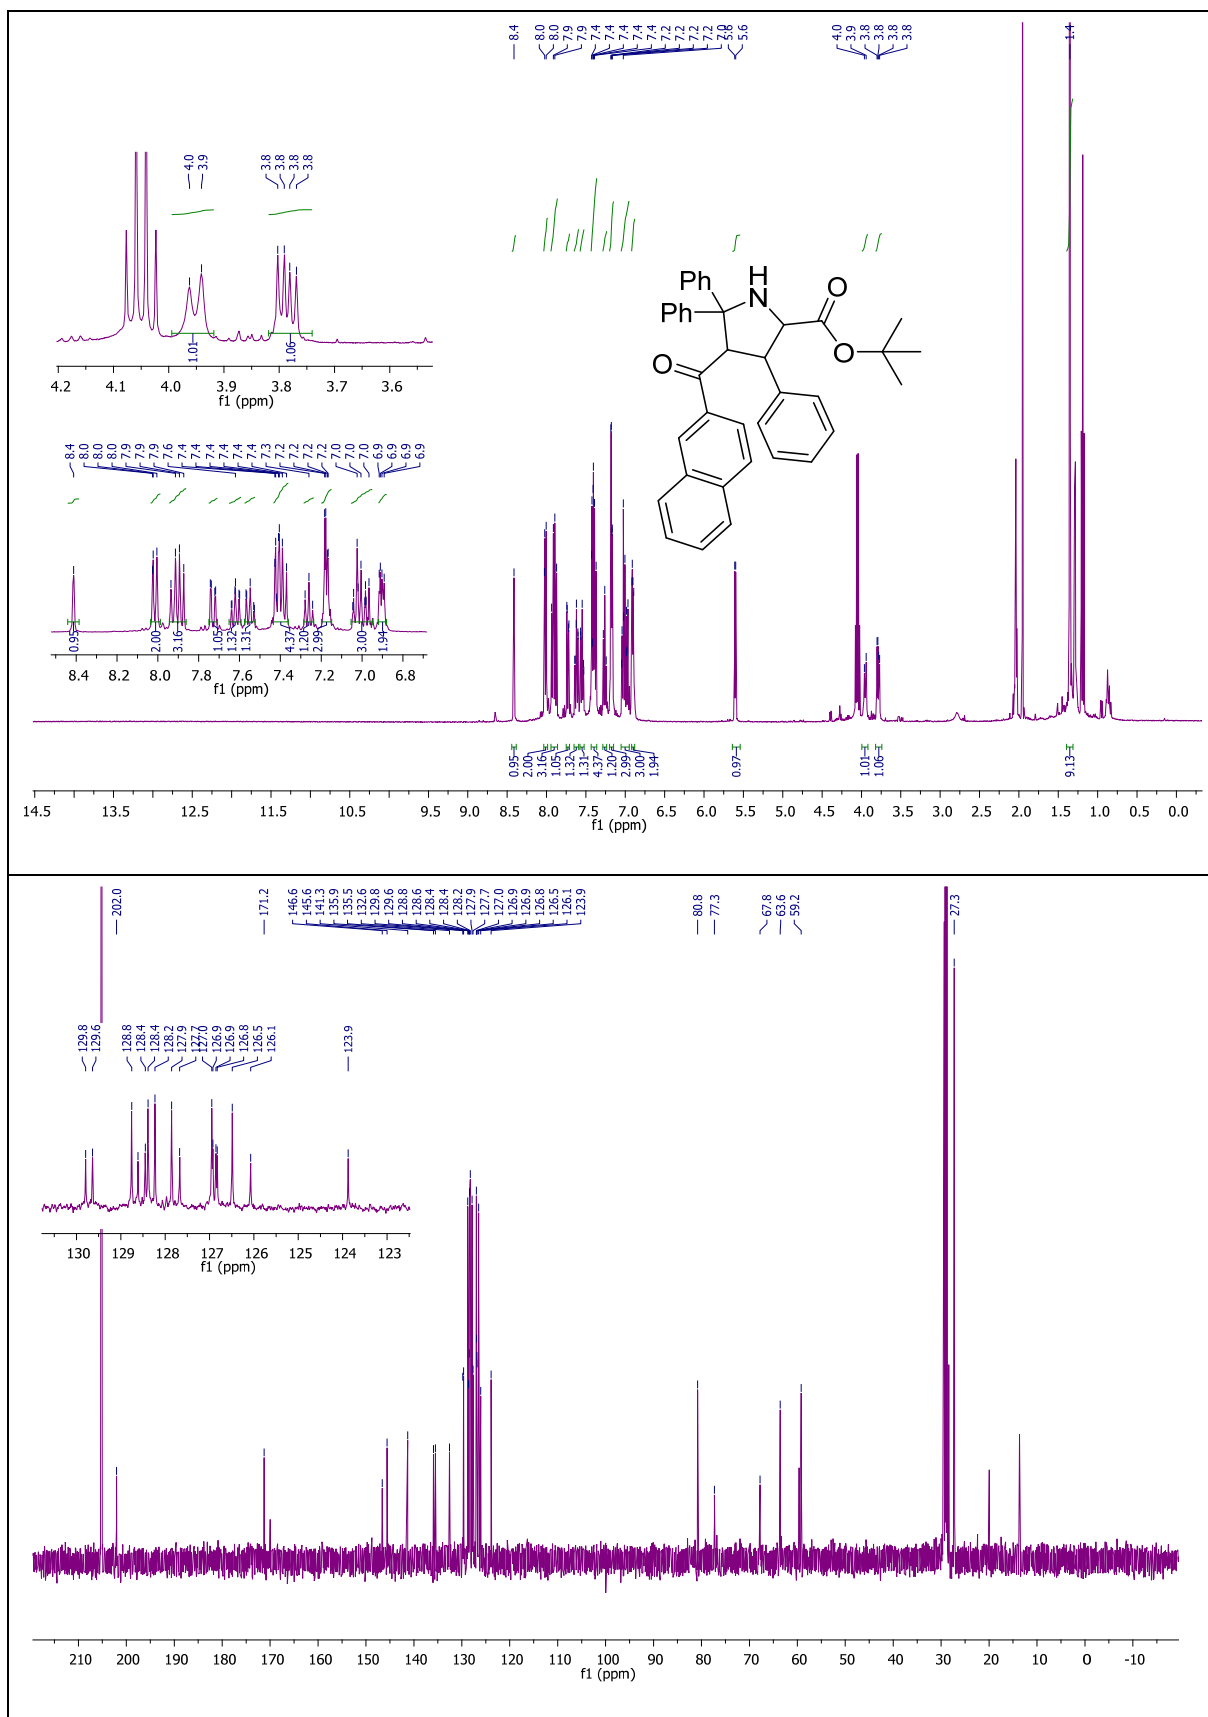

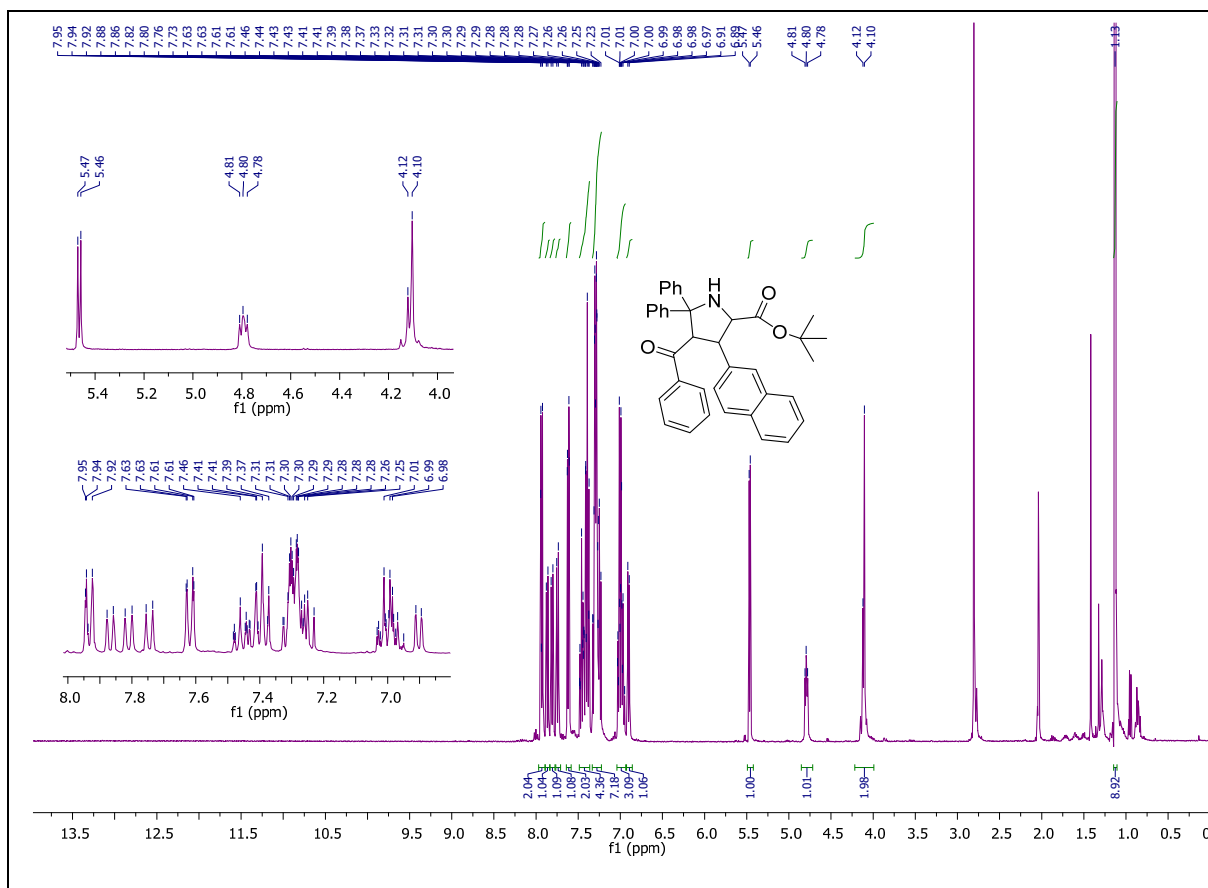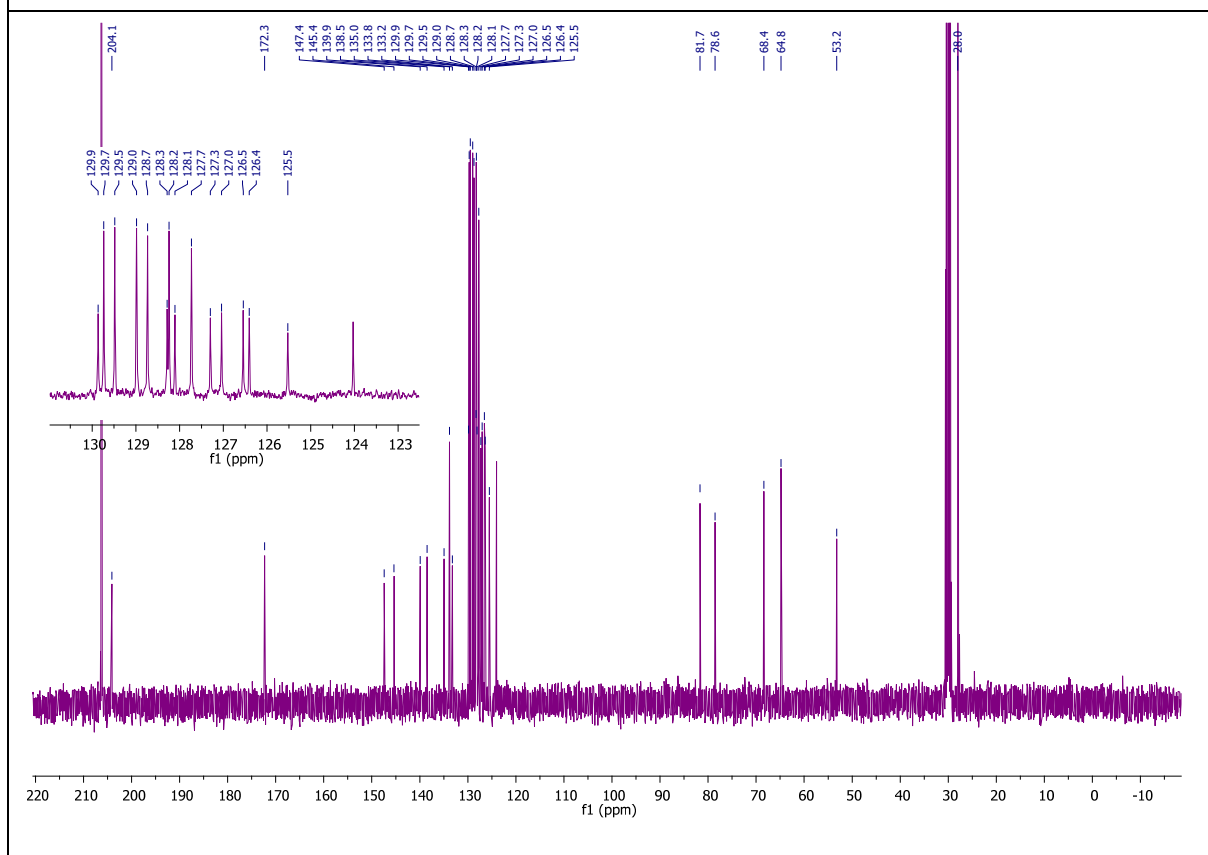



#### 4. Copies of HPLC chromatograms

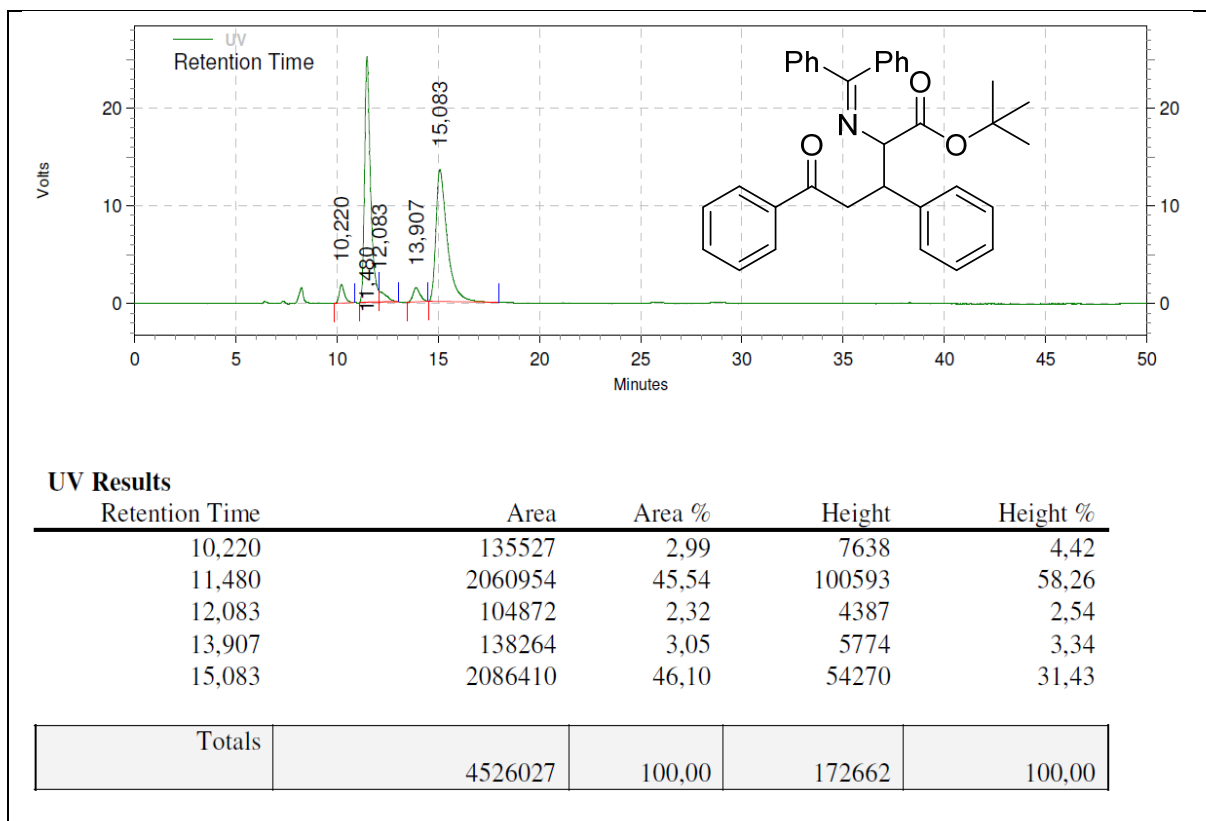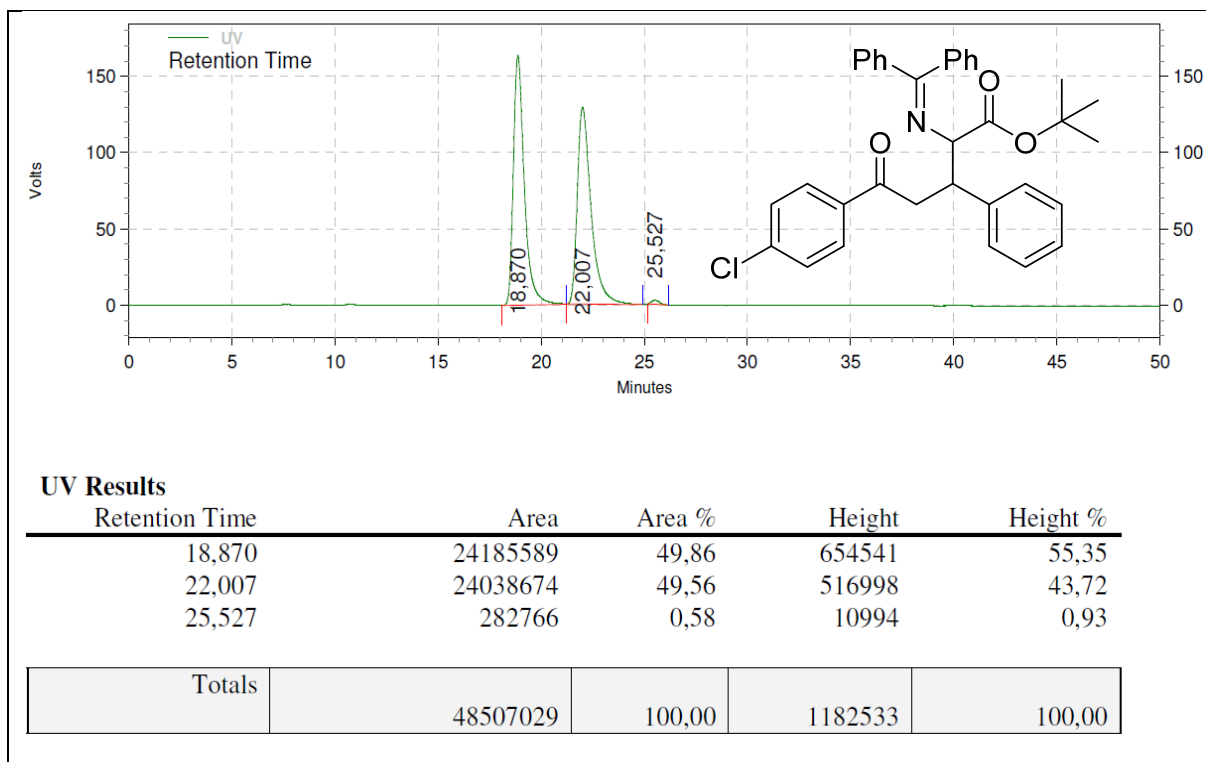

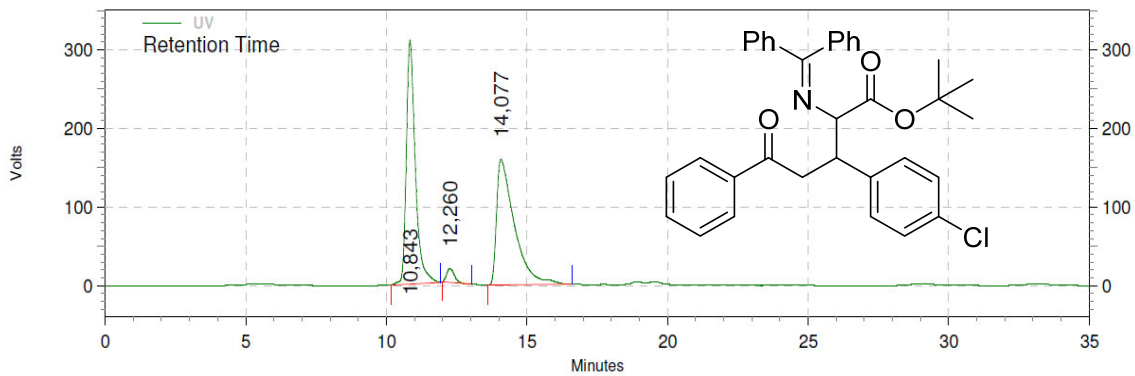

#### UV Results

| Retention Time | Area     | Area % | Height  | Height % |
|----------------|----------|--------|---------|----------|
| 10,843         | 27505736 | 48,28  | 1242523 | 63,59    |
| 12,260         | 1340855  | 2,35   | 70533   | 3,61     |
| 14,077         | 28128019 | 49,37  | 640982  | 32,80    |

|        |          |        |         |        |
|--------|----------|--------|---------|--------|
| Totals | 56974610 | 100,00 | 1954038 | 100,00 |
|--------|----------|--------|---------|--------|

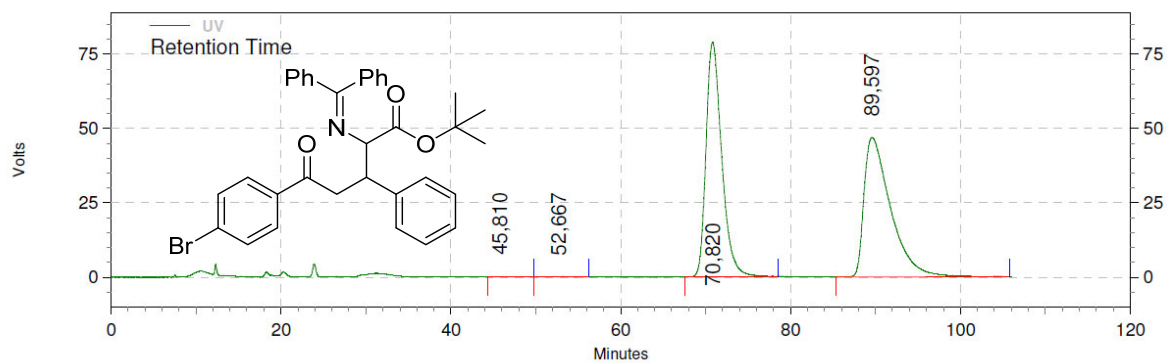

#### UV Results

| Retention Time | Area     | Area % | Height | Height % |
|----------------|----------|--------|--------|----------|
| 45,810         | 54188    | 0,07   | 488    | 0,10     |
| 52,667         | 145028   | 0,18   | 1065   | 0,21     |
| 70,820         | 40481504 | 49,66  | 315219 | 62,47    |
| 89,597         | 40829810 | 50,09  | 187816 | 37,22    |

|        |          |        |        |        |
|--------|----------|--------|--------|--------|
| Totals | 81510530 | 100,00 | 504588 | 100,00 |
|--------|----------|--------|--------|--------|

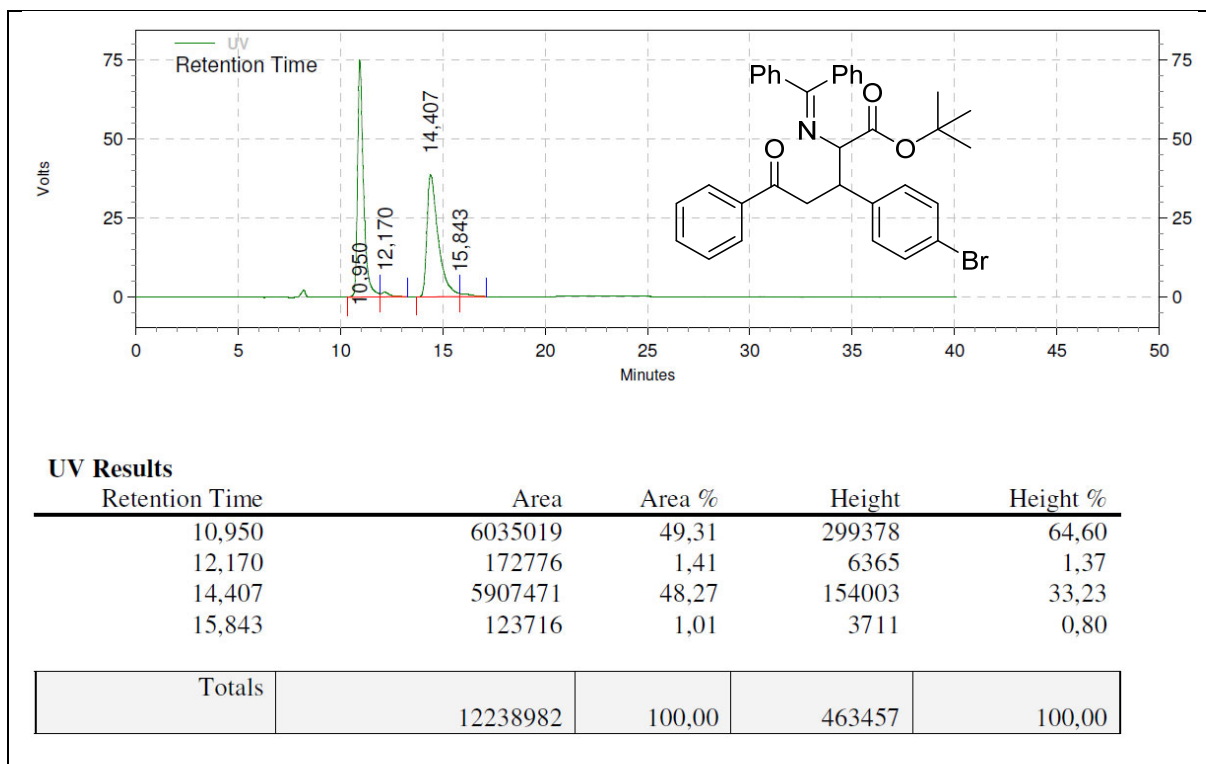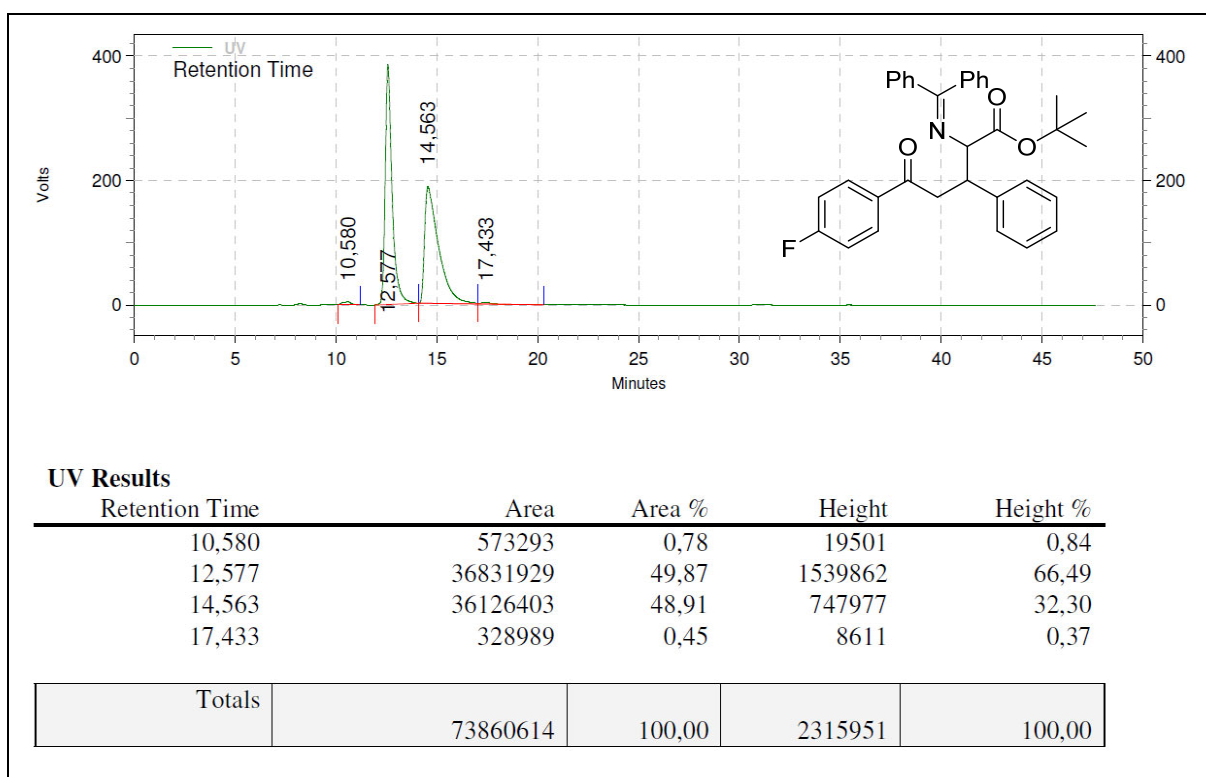

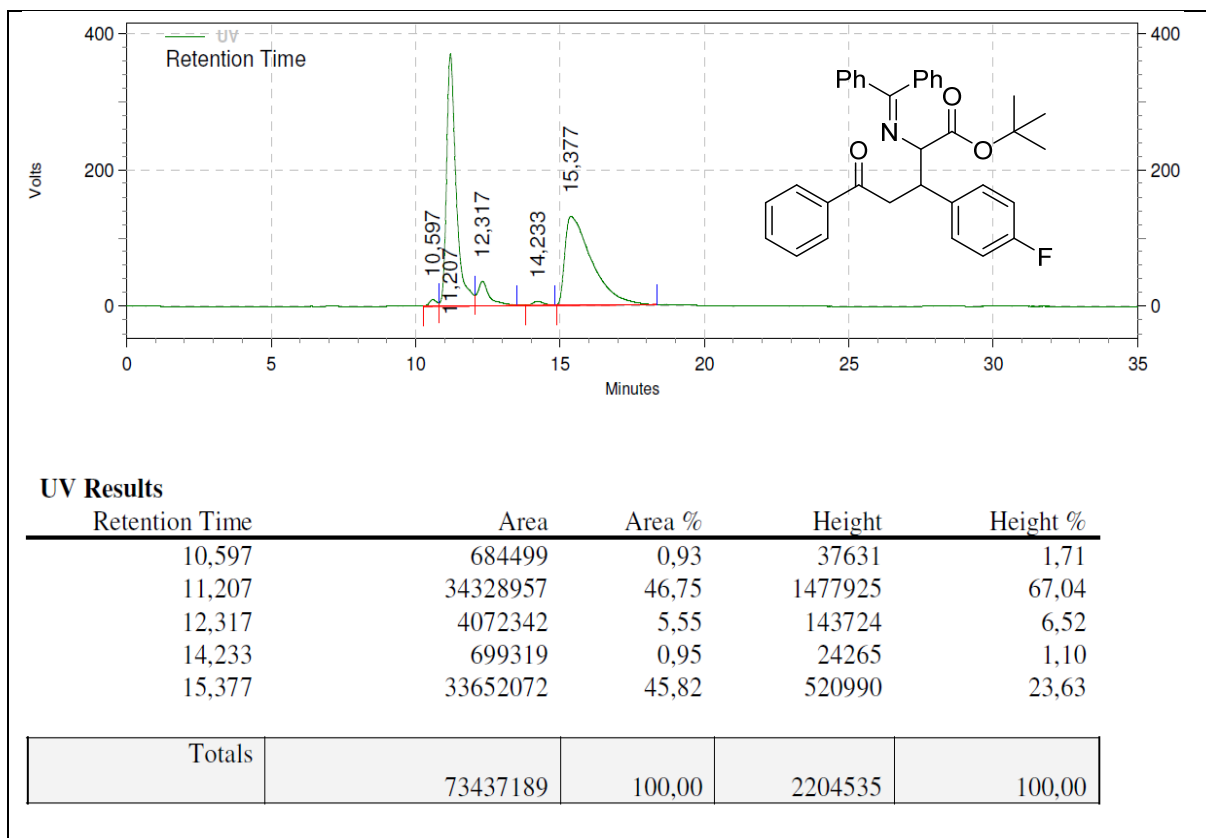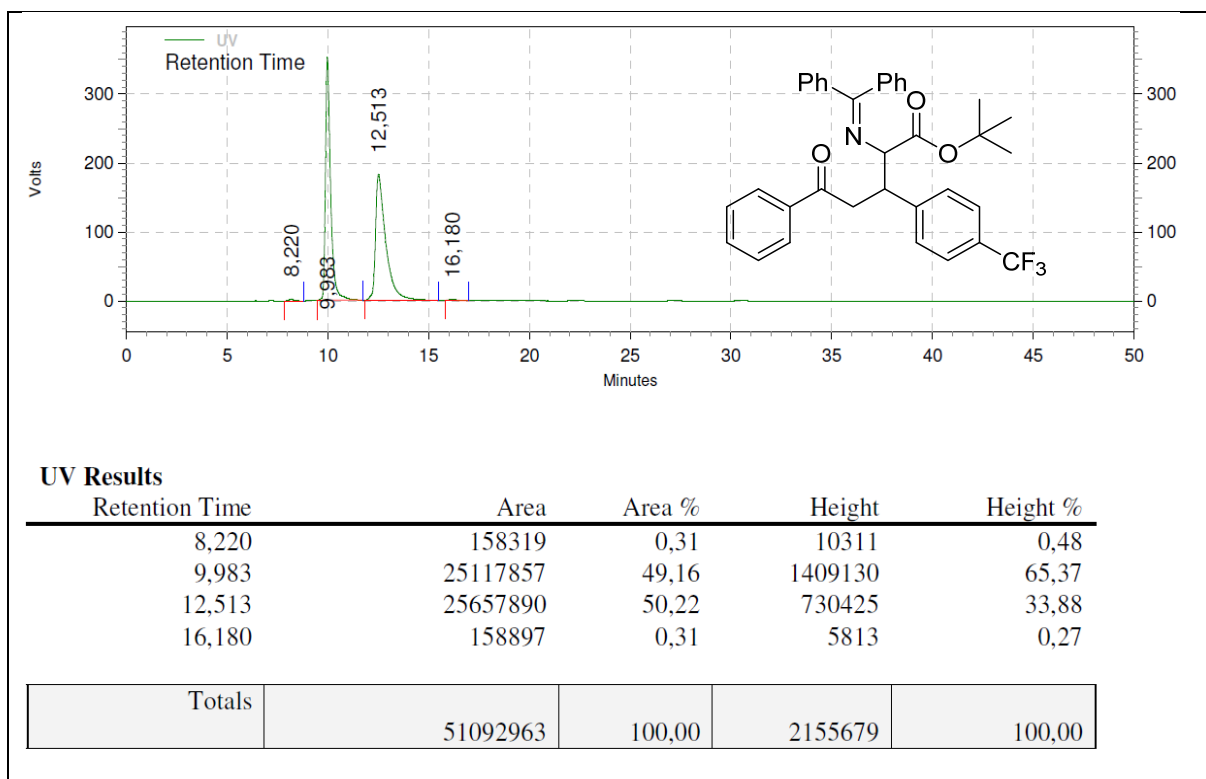

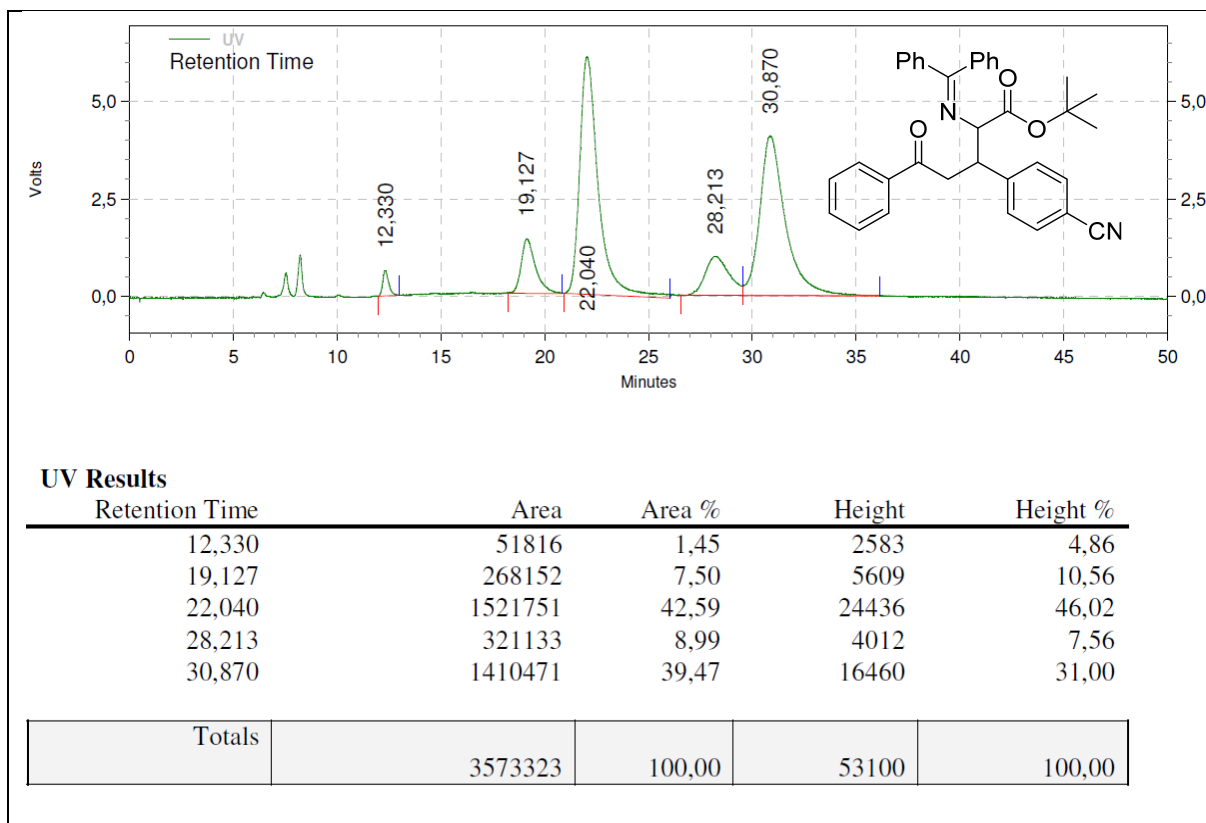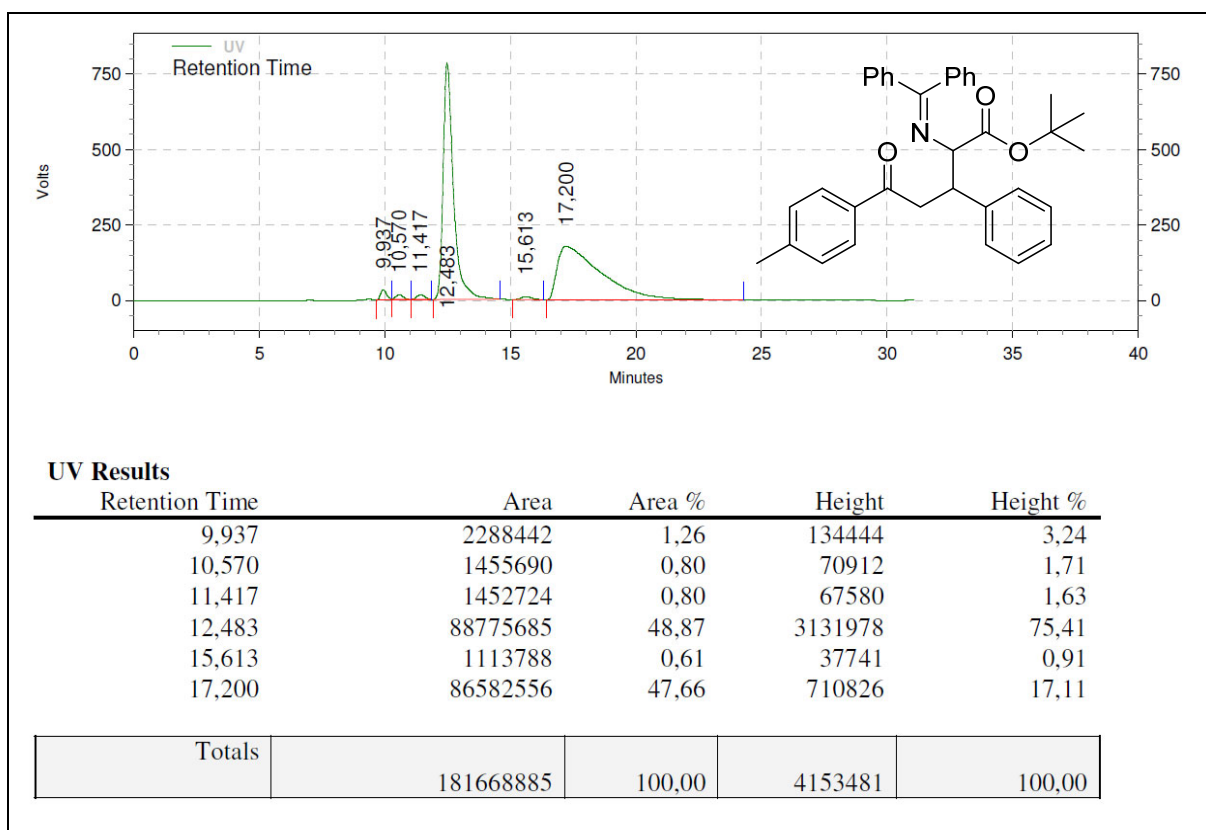

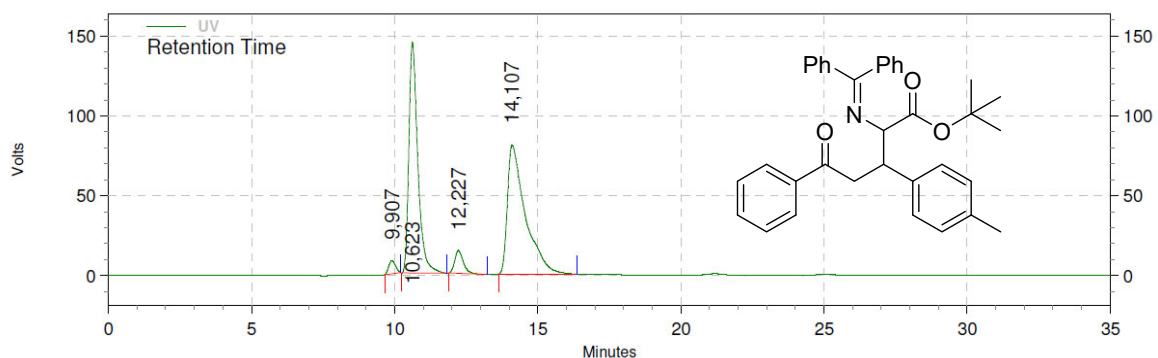

### UV Results

| Retention Time | Area            | Area %        | Height        | Height %      |
|----------------|-----------------|---------------|---------------|---------------|
| 9,907          | 526123          | 1,86          | 32465         | 3,28          |
| 10,623         | 12537526        | 44,34         | 576840        | 58,27         |
| 12,227         | 1177590         | 4,16          | 57200         | 5,78          |
| 14,107         | 14032246        | 49,63         | 323482        | 32,68         |
| <b>Totals</b>  | <b>28273485</b> | <b>100,00</b> | <b>989987</b> | <b>100,00</b> |

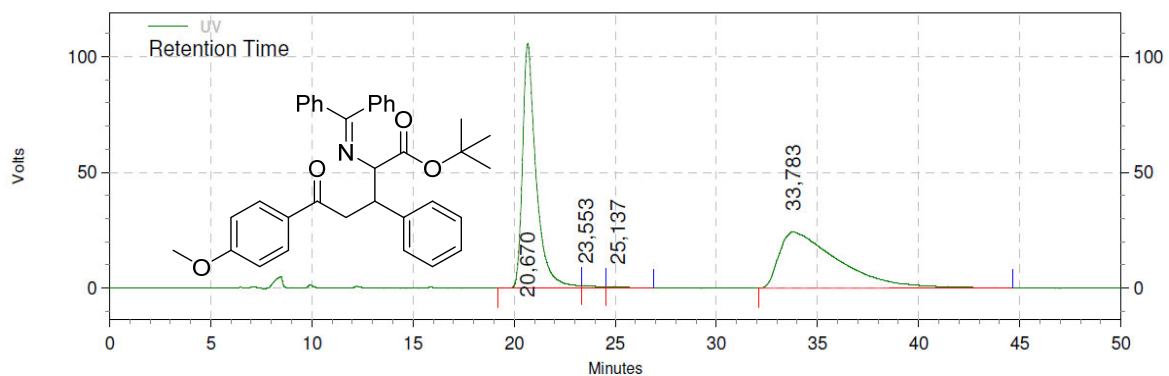

### UV Results

| Retention Time | Area            | Area %        | Height        | Height %      |
|----------------|-----------------|---------------|---------------|---------------|
| 20,670         | 19715310        | 49,60         | 422294        | 80,42         |
| 23,553         | 197694          | 0,50          | 3739          | 0,71          |
| 25,137         | 125601          | 0,32          | 2023          | 0,39          |
| 33,783         | 19706039        | 49,58         | 97080         | 18,49         |
| <b>Totals</b>  | <b>39744644</b> | <b>100,00</b> | <b>525136</b> | <b>100,00</b> |

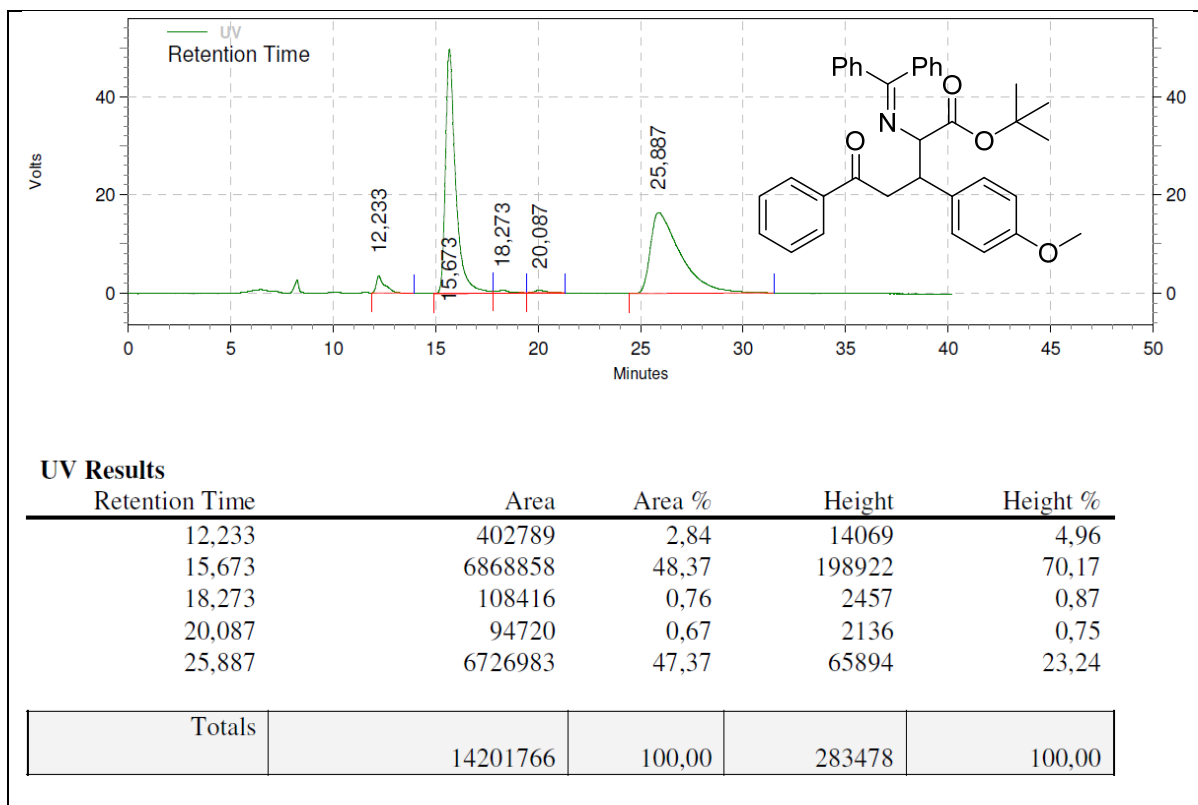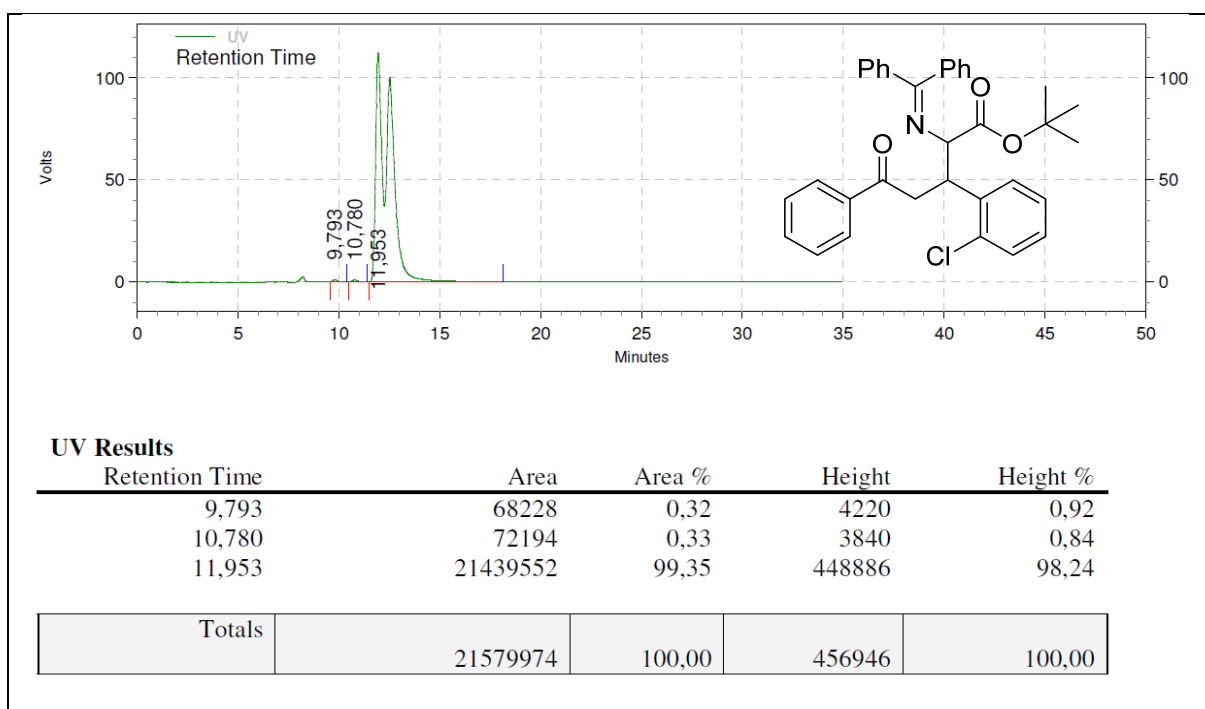

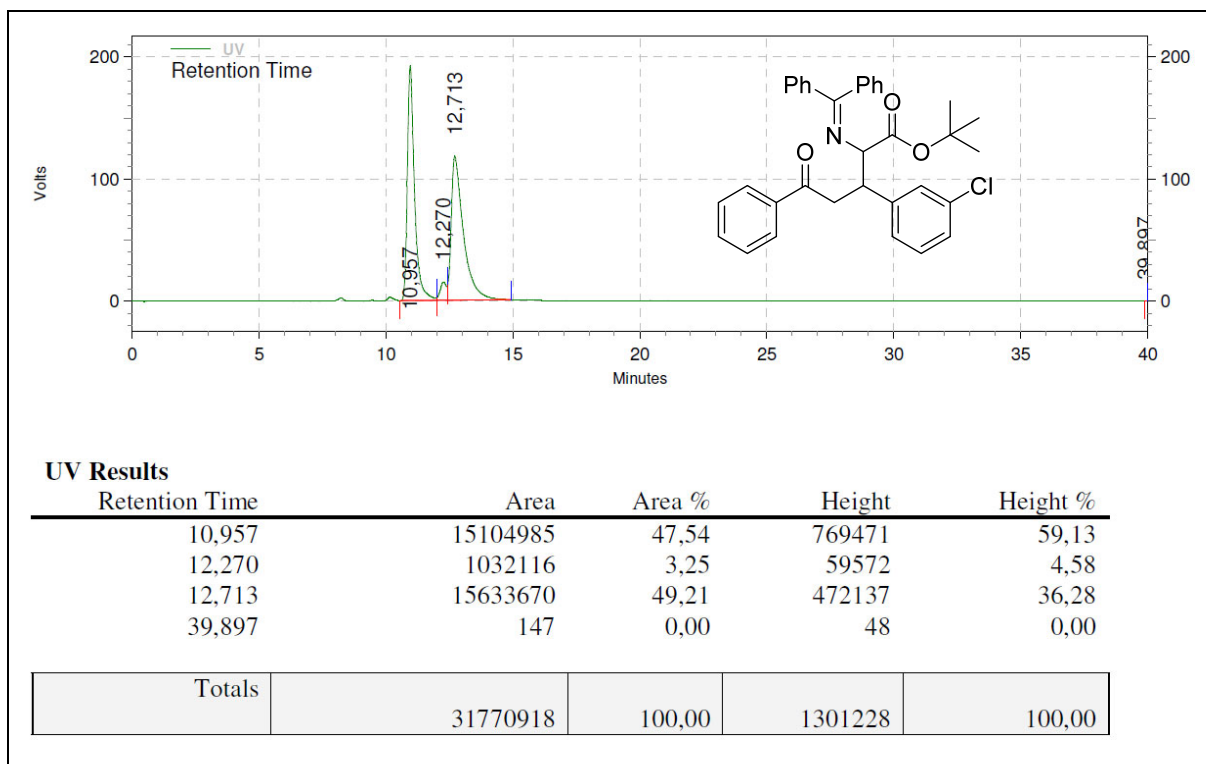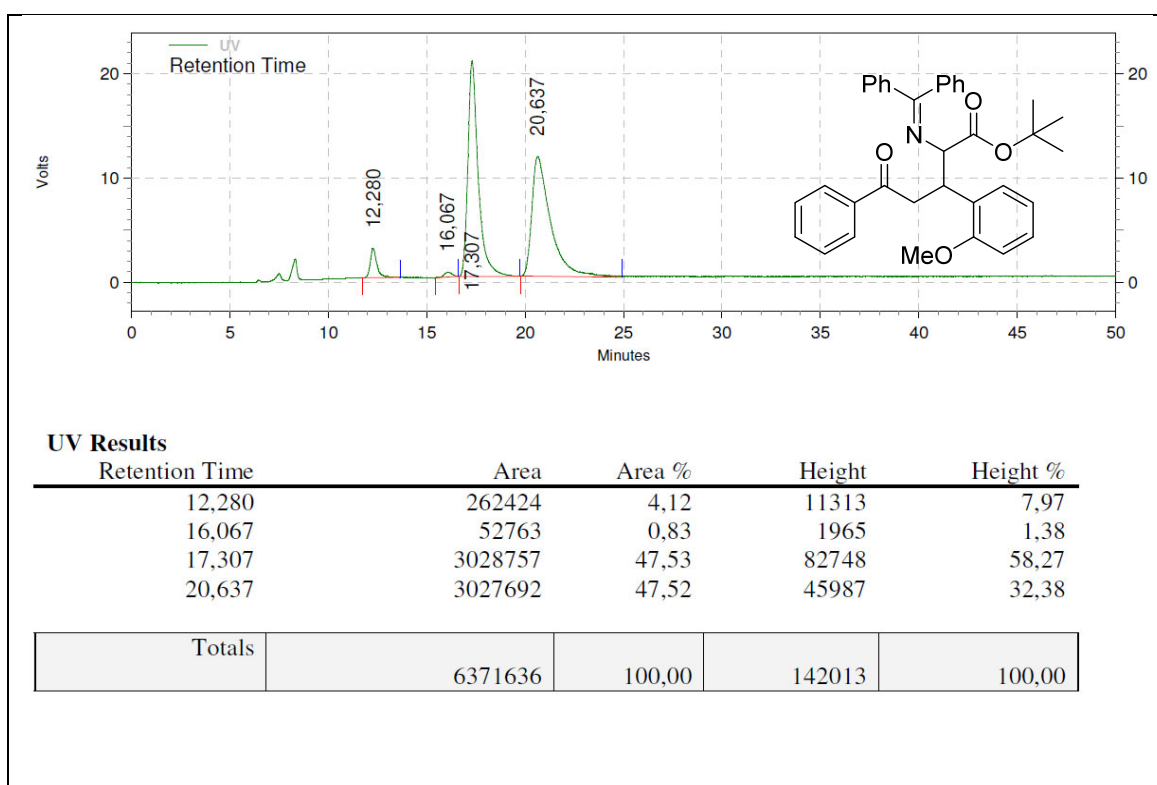



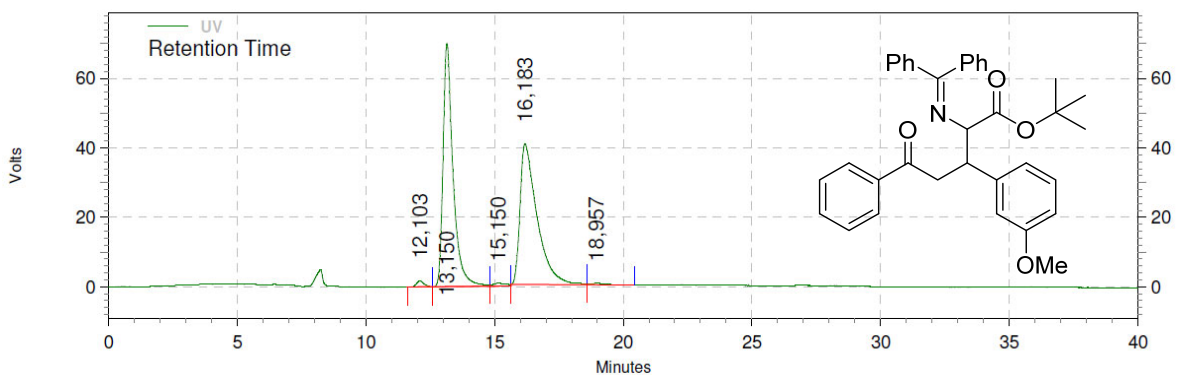

**UV Results**

| Retention Time | Area            | Area %        | Height        | Height %      |
|----------------|-----------------|---------------|---------------|---------------|
| 12,103         | 135840          | 0,88          | 6937          | 1,53          |
| 13,150         | 7562044         | 49,21         | 280088        | 61,69         |
| 15,150         | 119198          | 0,78          | 3266          | 0,72          |
| 16,183         | 7471148         | 48,61         | 162085        | 35,70         |
| 18,957         | 80072           | 0,52          | 1628          | 0,36          |
| <b>Totals</b>  | <b>15368302</b> | <b>100,00</b> | <b>454004</b> | <b>100,00</b> |

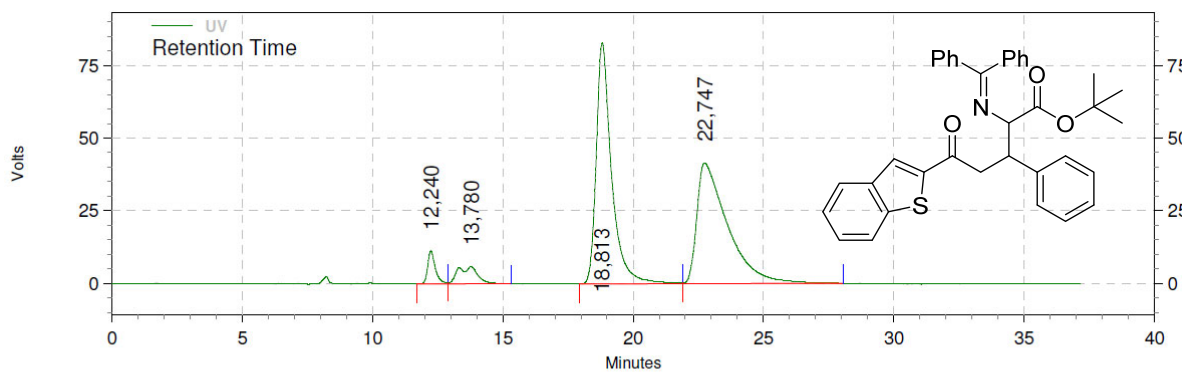

**UV Results**

| Retention Time | Area            | Area %        | Height        | Height %      |
|----------------|-----------------|---------------|---------------|---------------|
| 12,240         | 924325          | 3,14          | 45422         | 8,00          |
| 13,780         | 1251680         | 4,26          | 23690         | 4,17          |
| 18,813         | 13624925        | 46,34         | 332148        | 58,52         |
| 22,747         | 13604194        | 46,26         | 166343        | 29,31         |
| <b>Totals</b>  | <b>29405124</b> | <b>100,00</b> | <b>567603</b> | <b>100,00</b> |

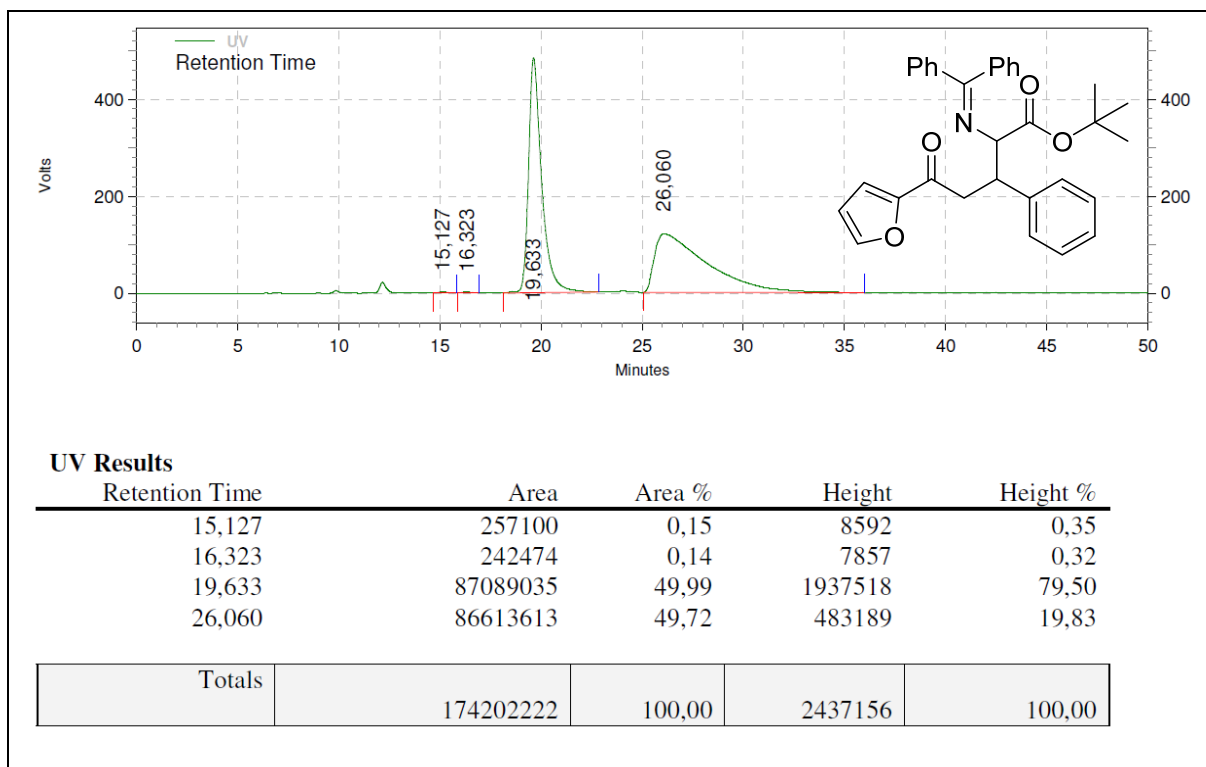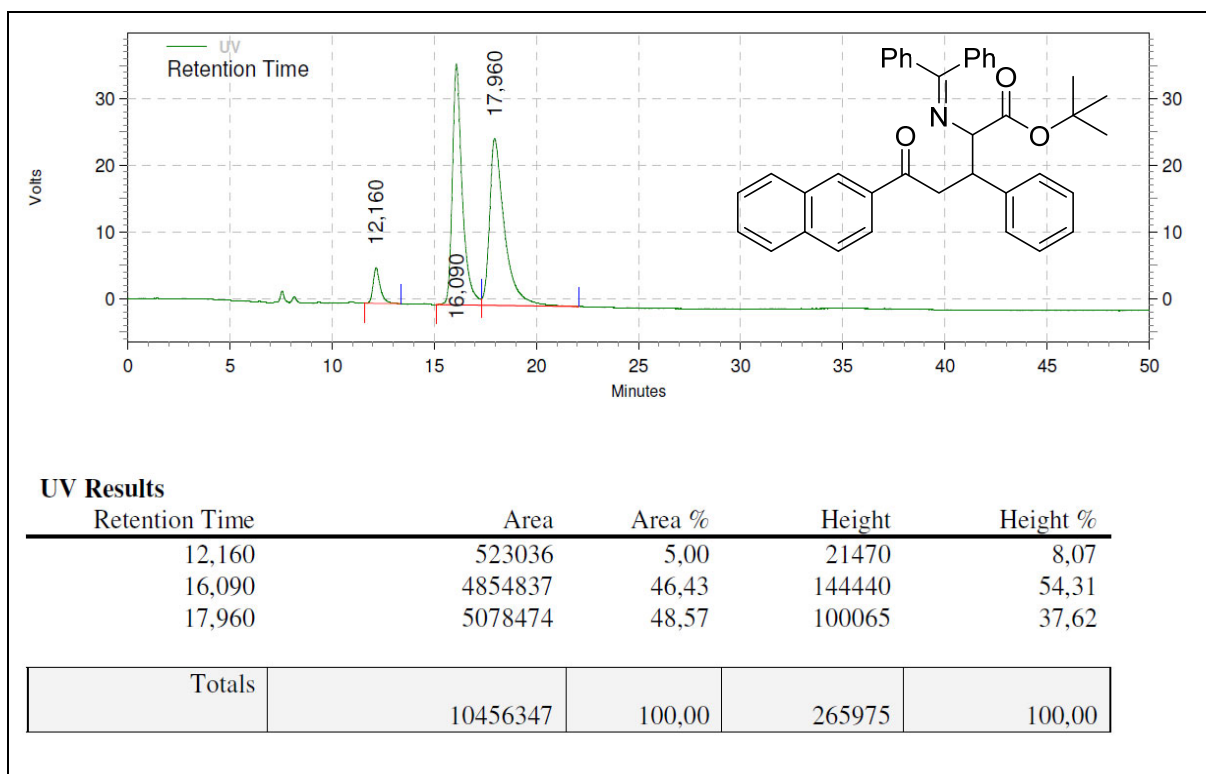

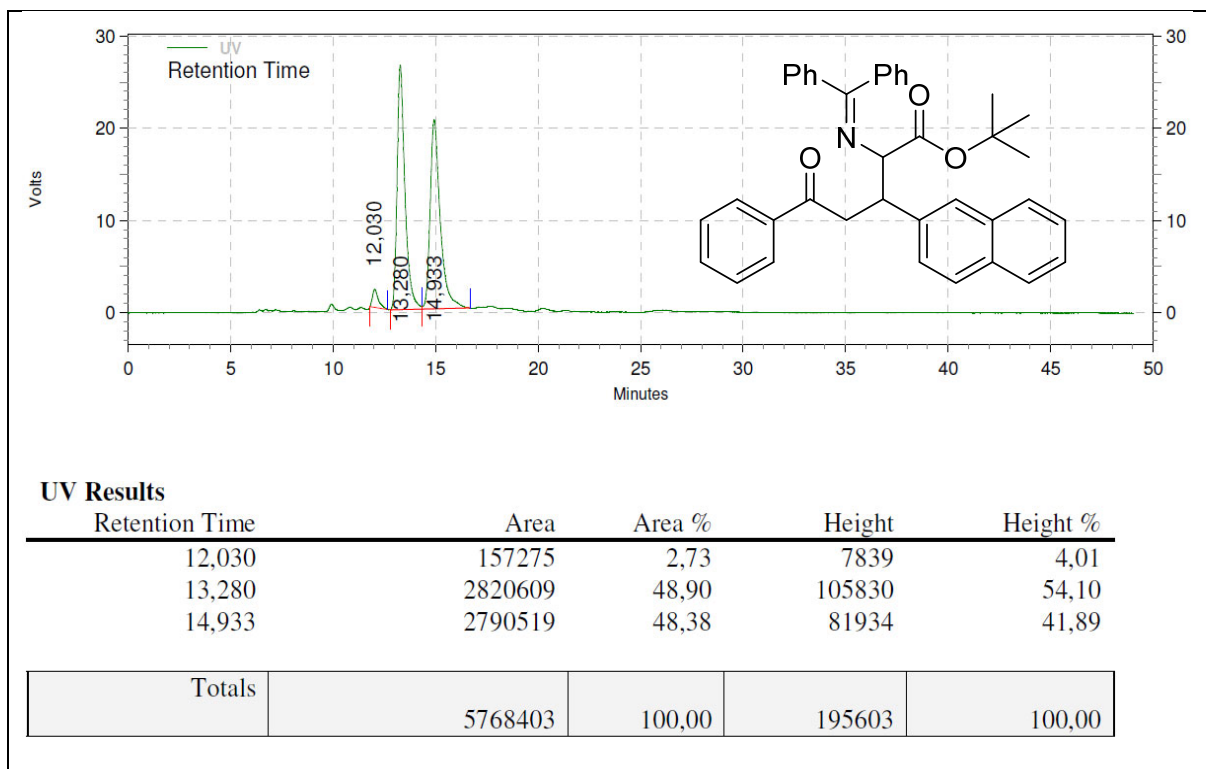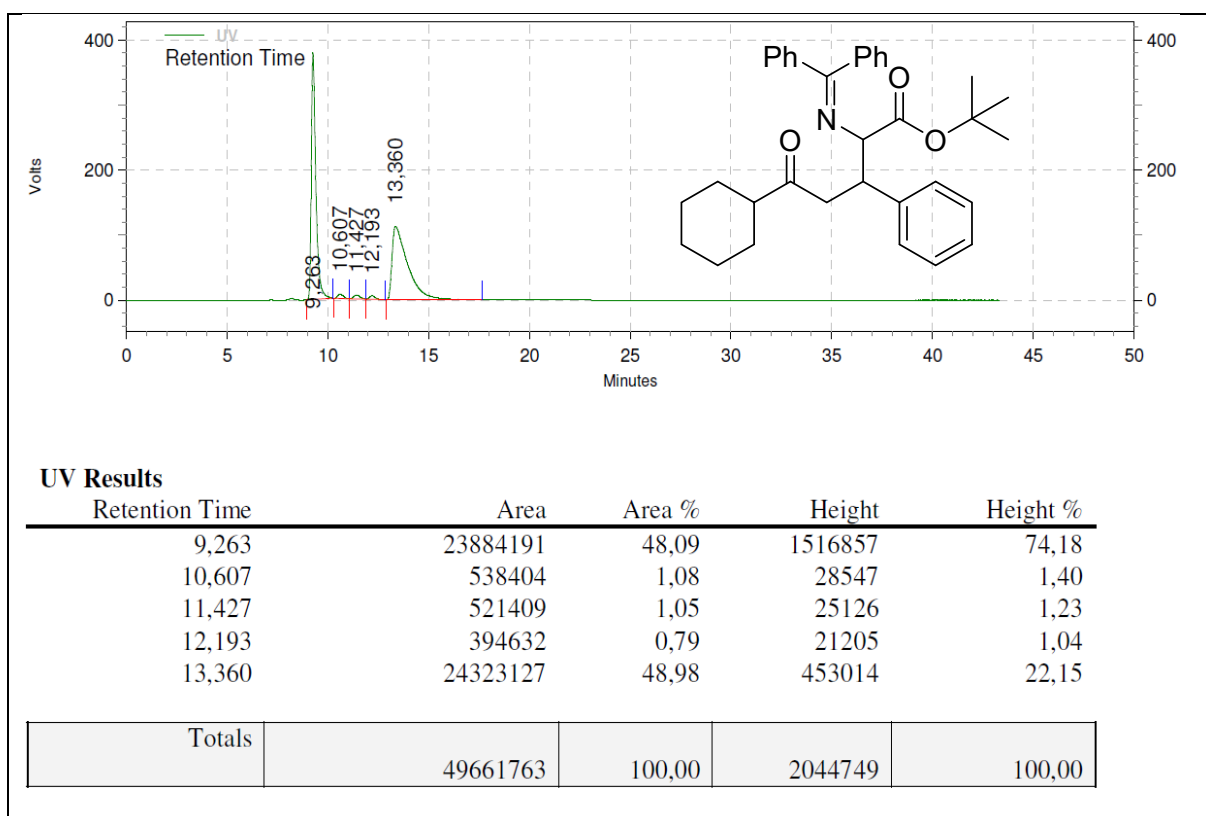

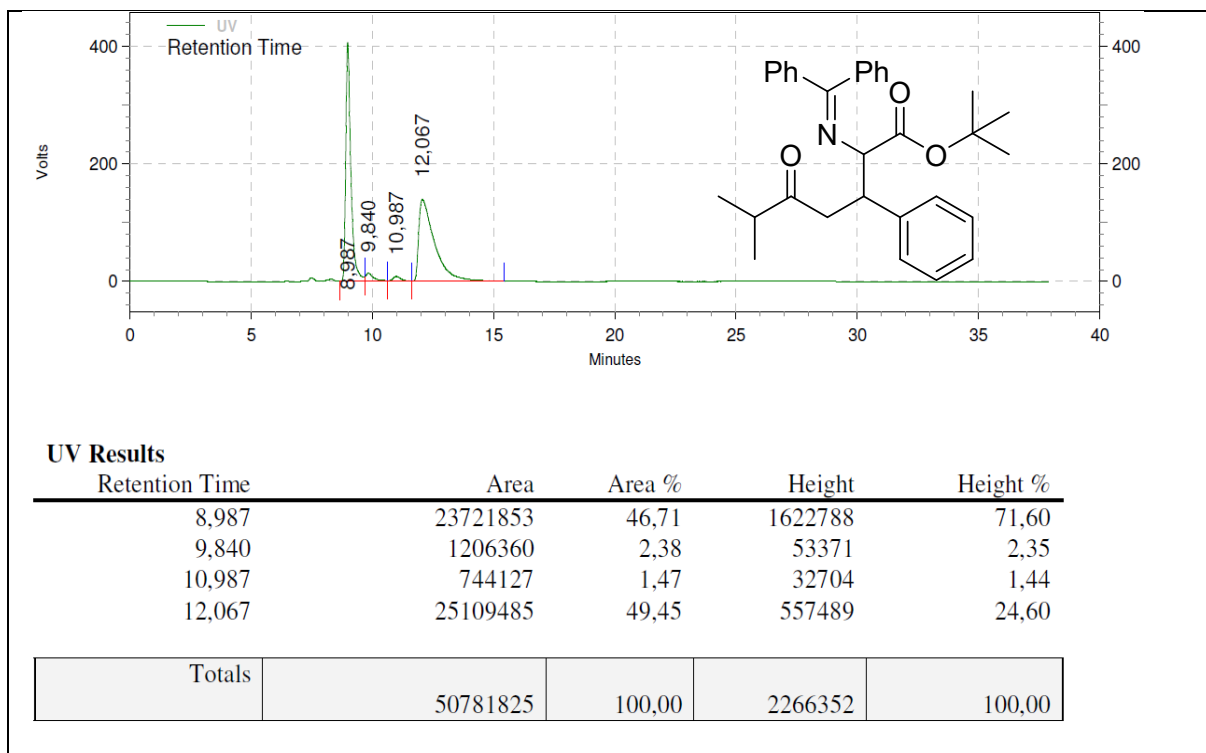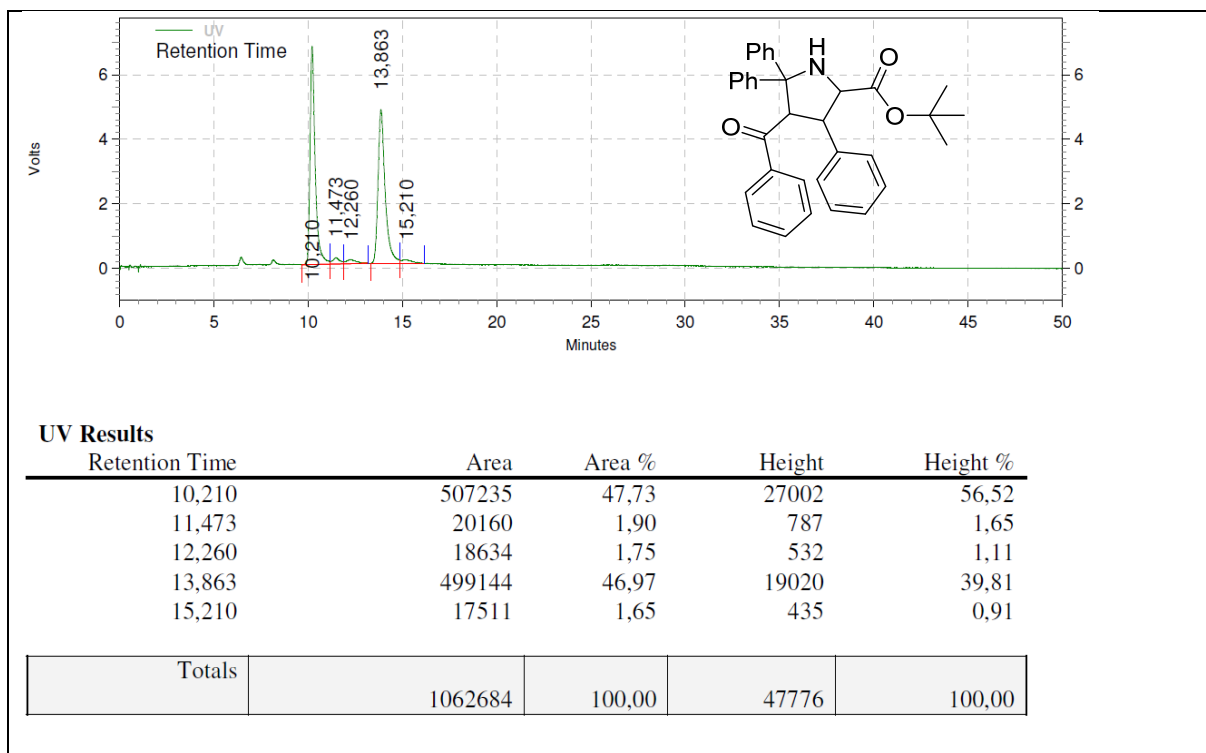

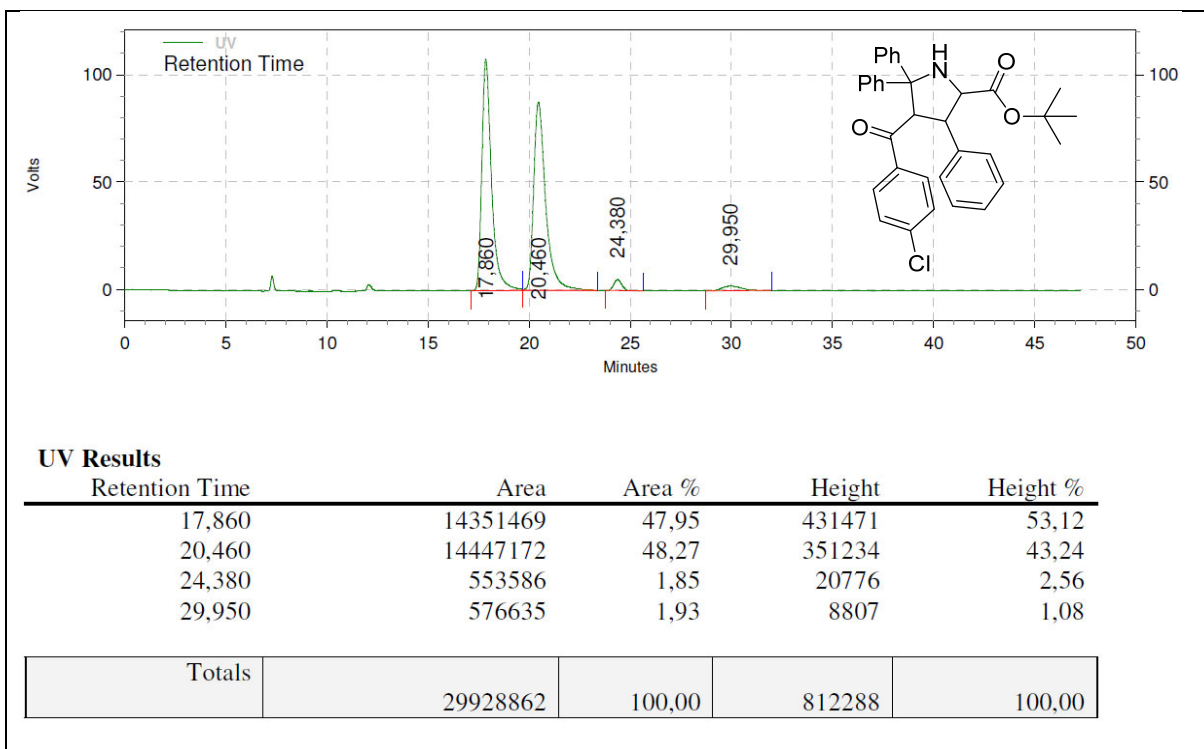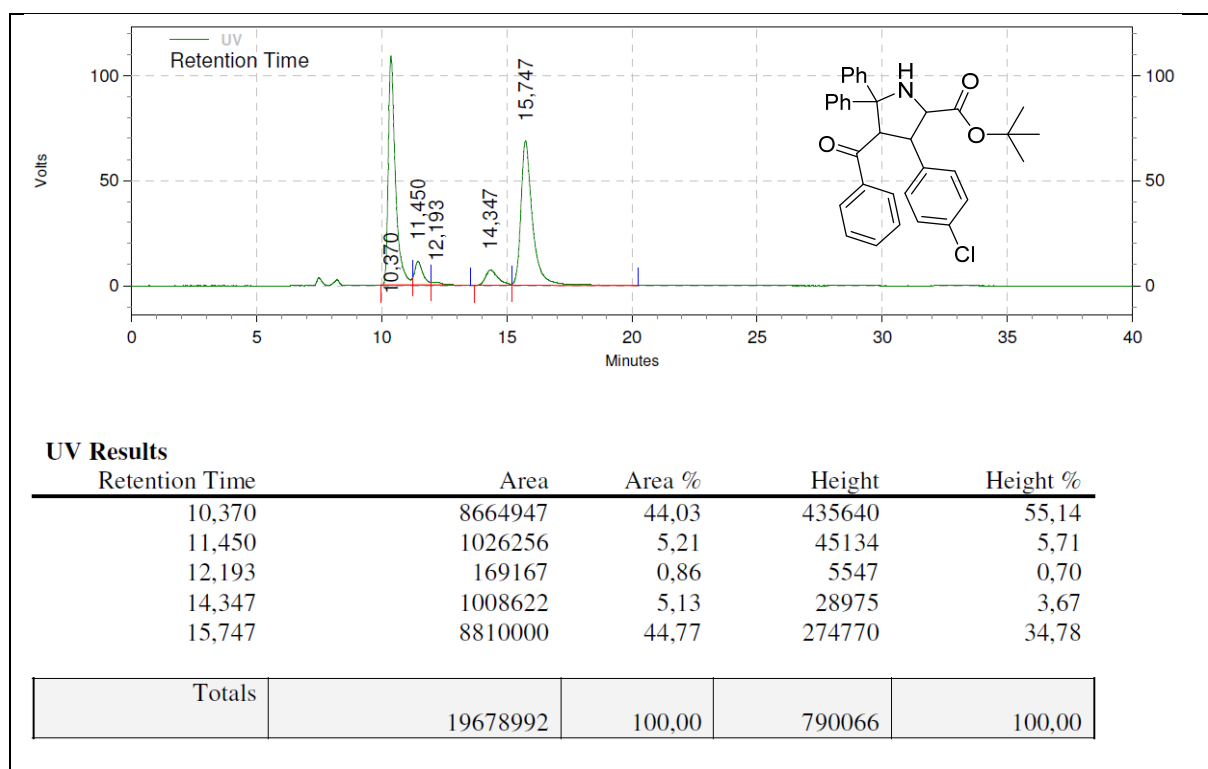

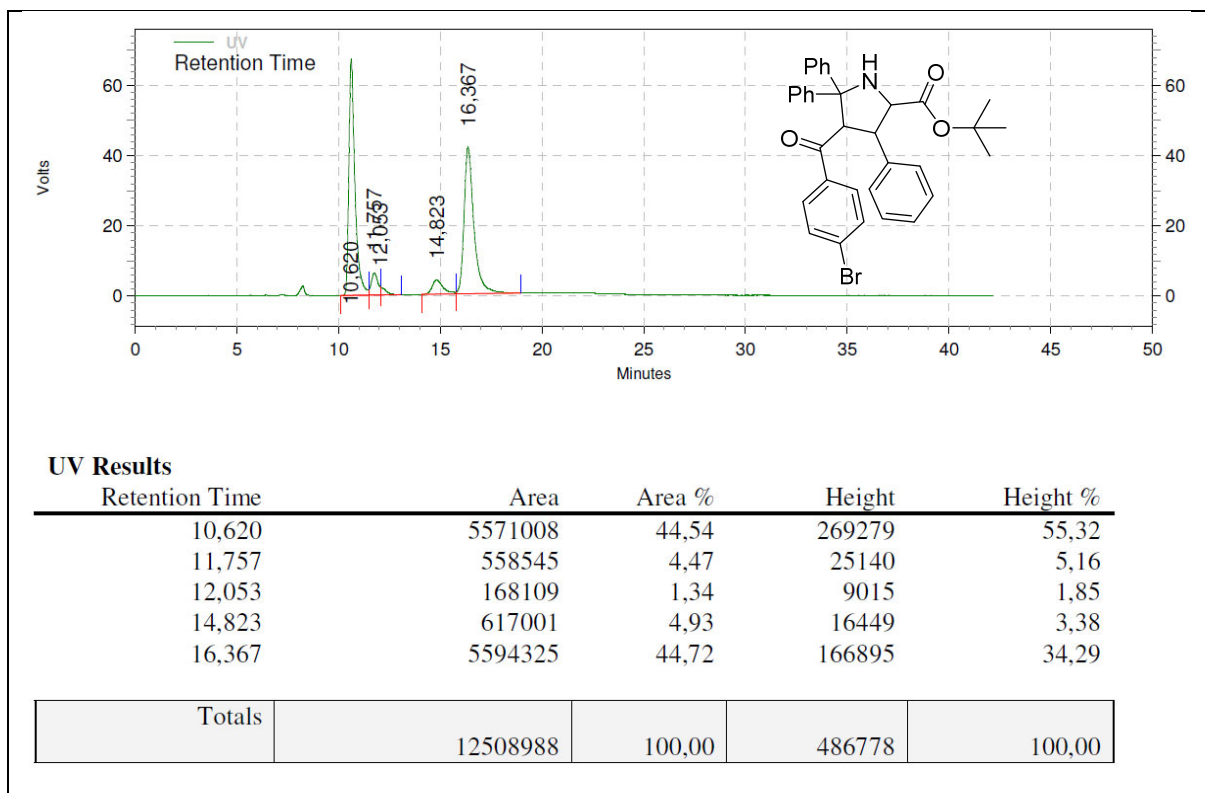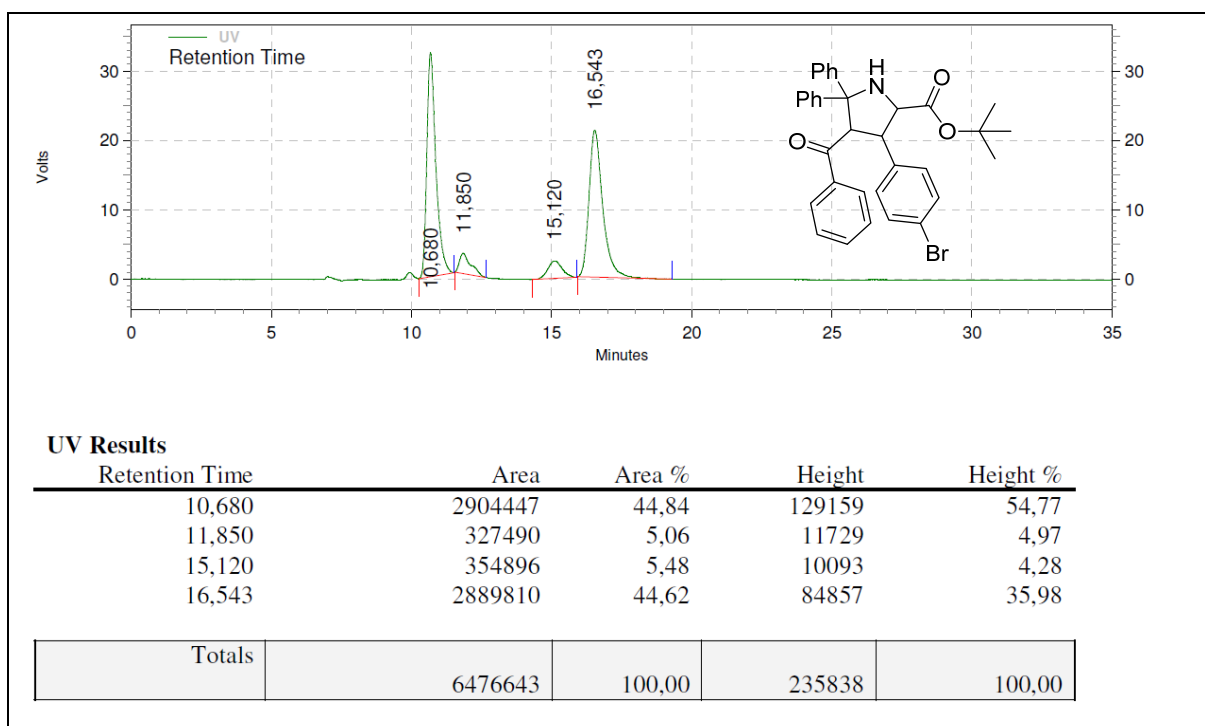

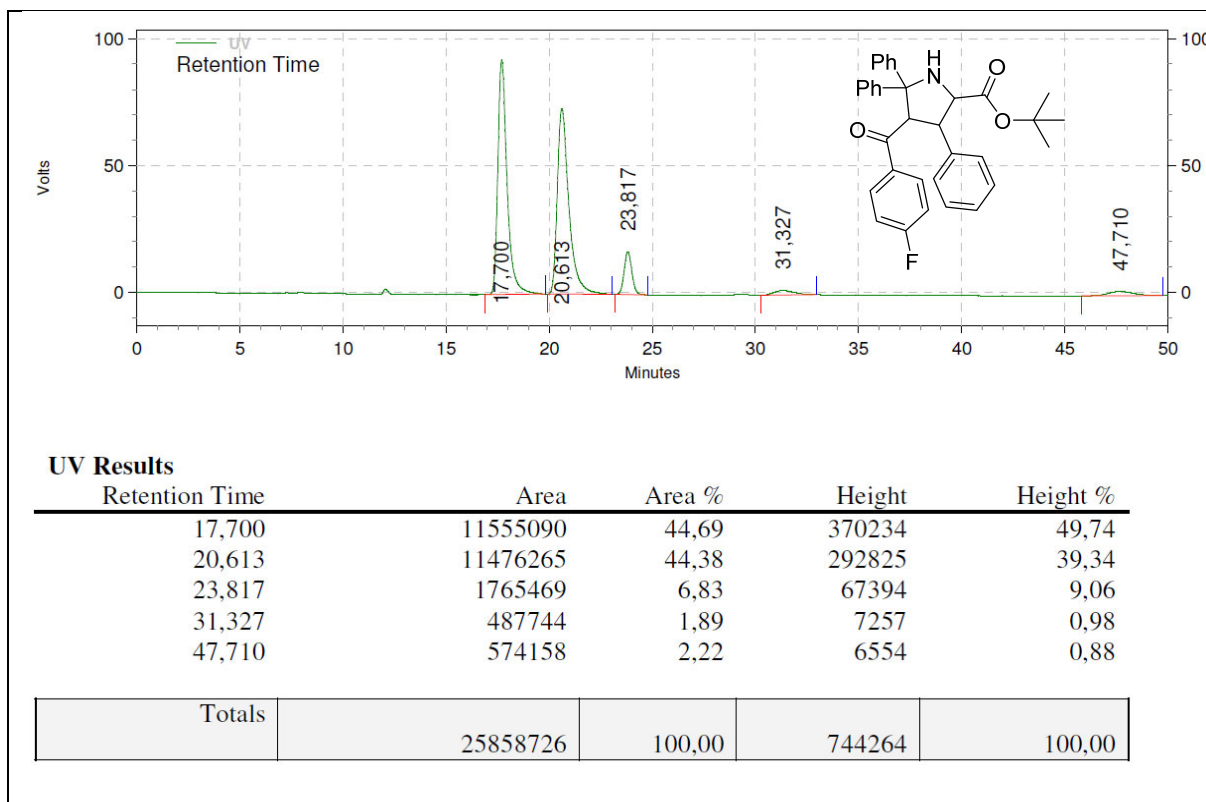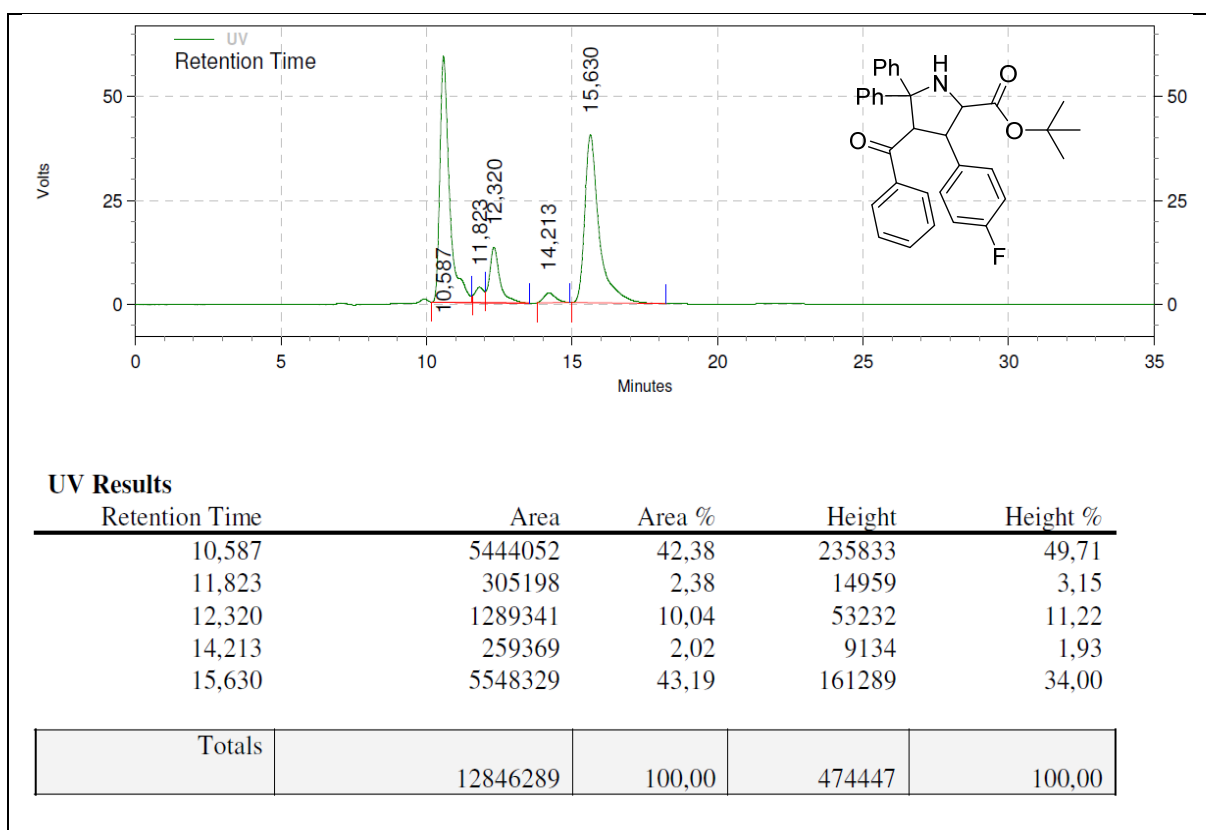

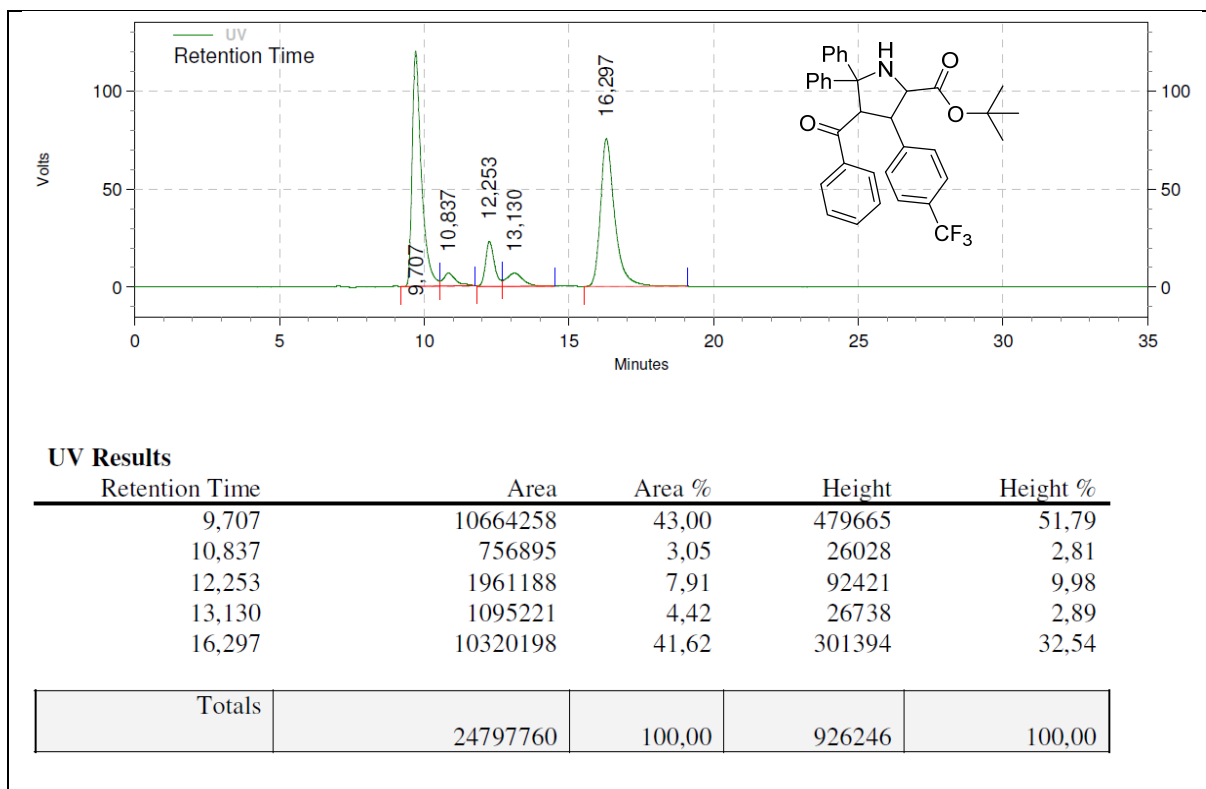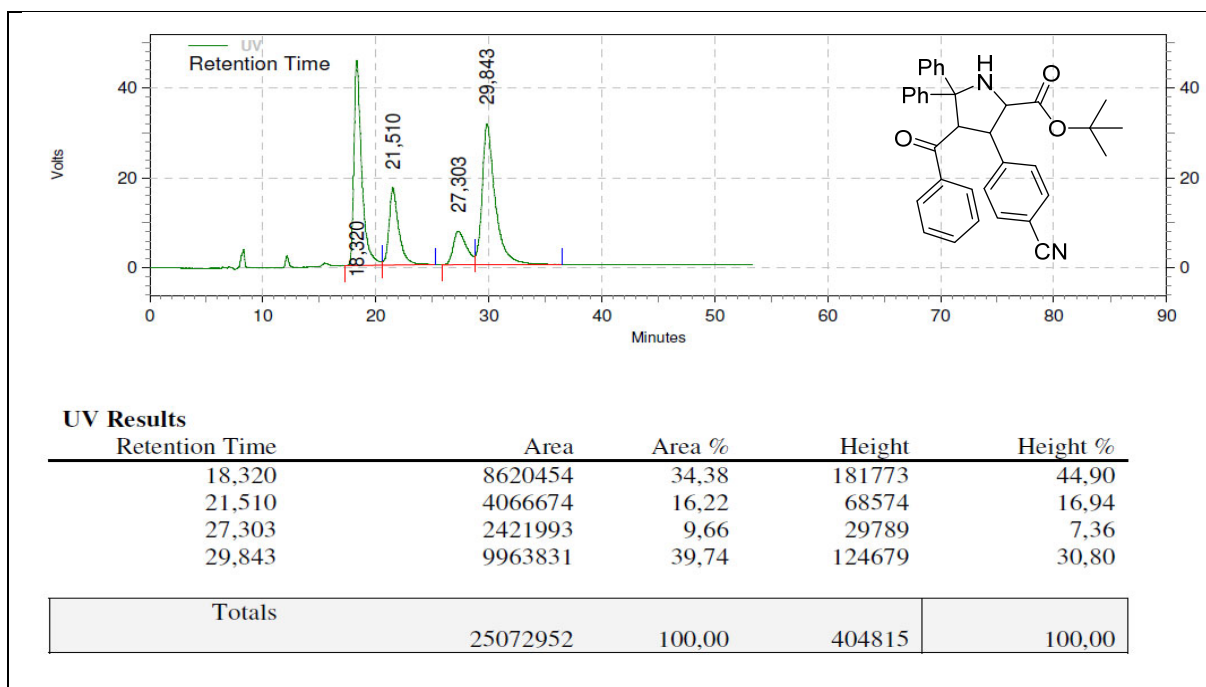



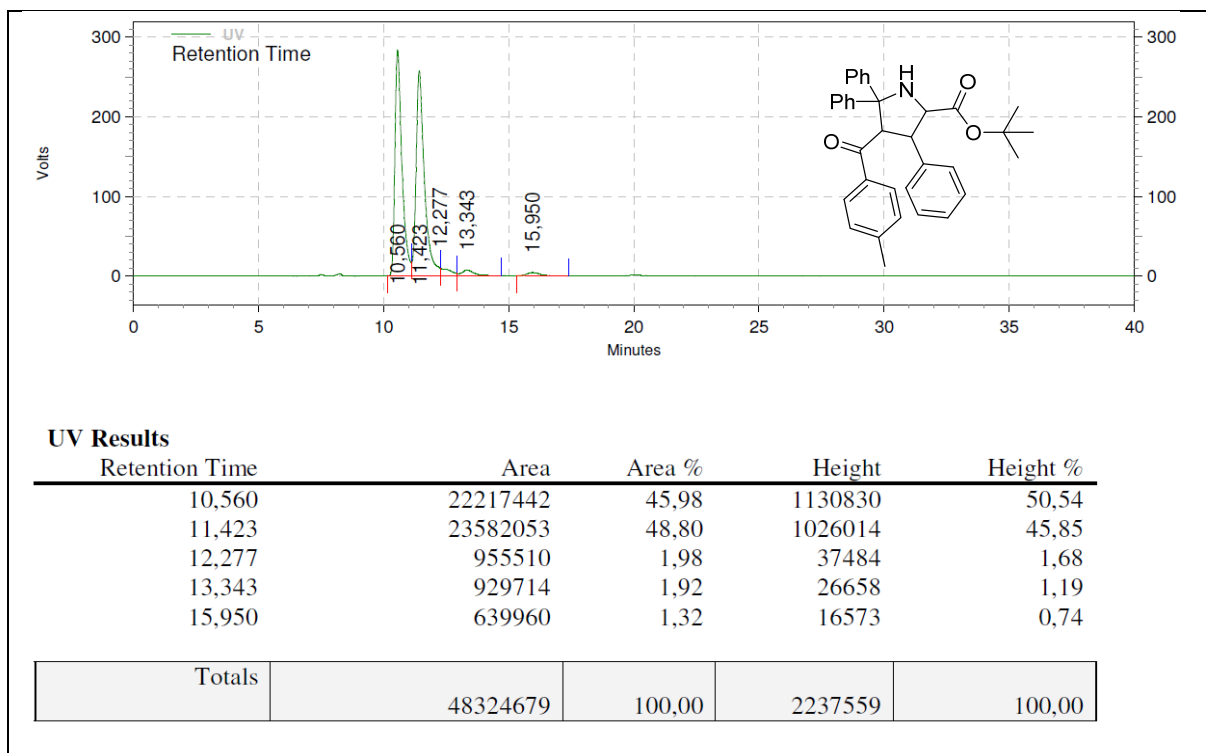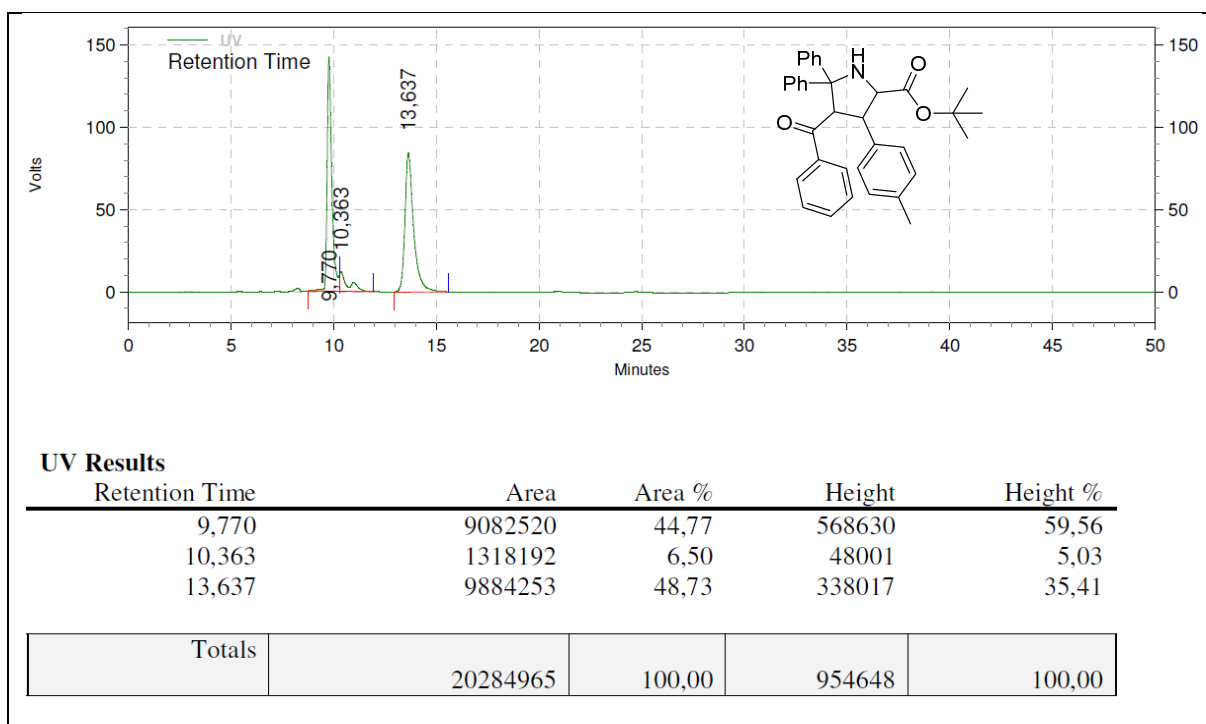

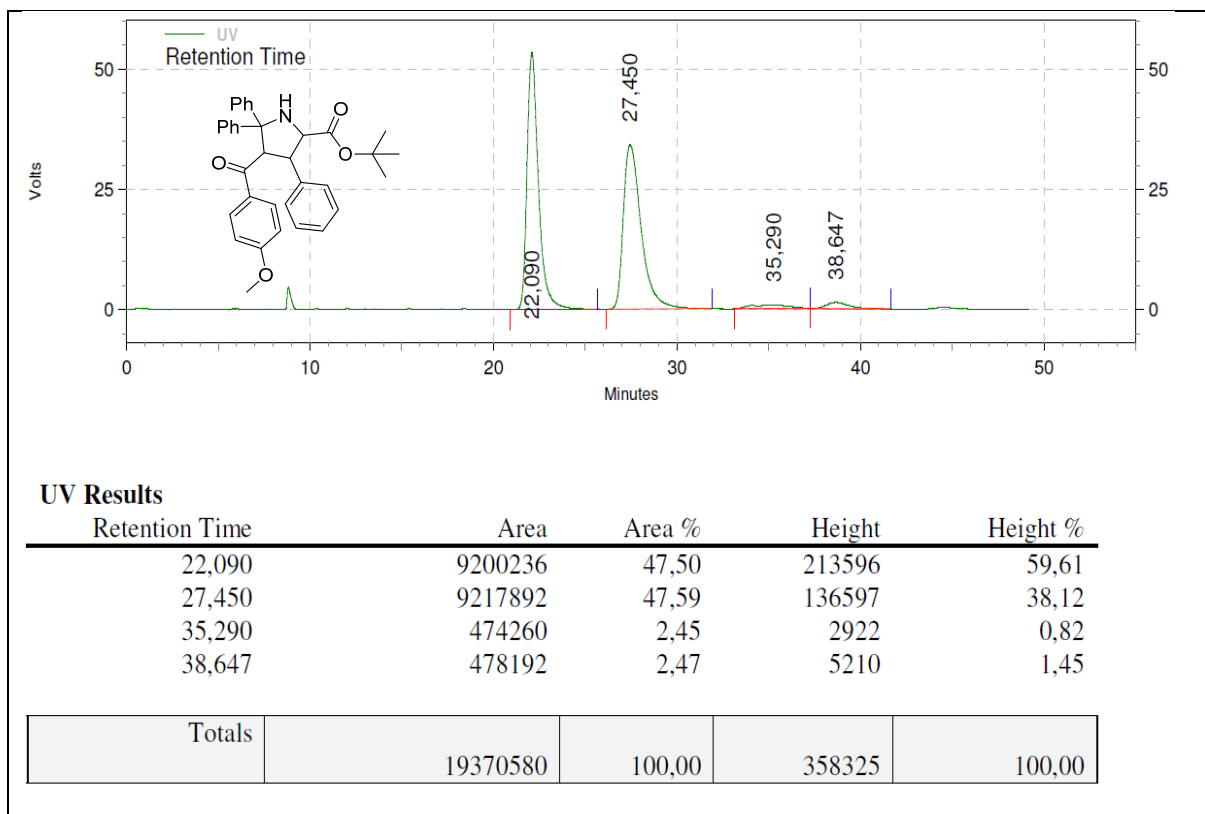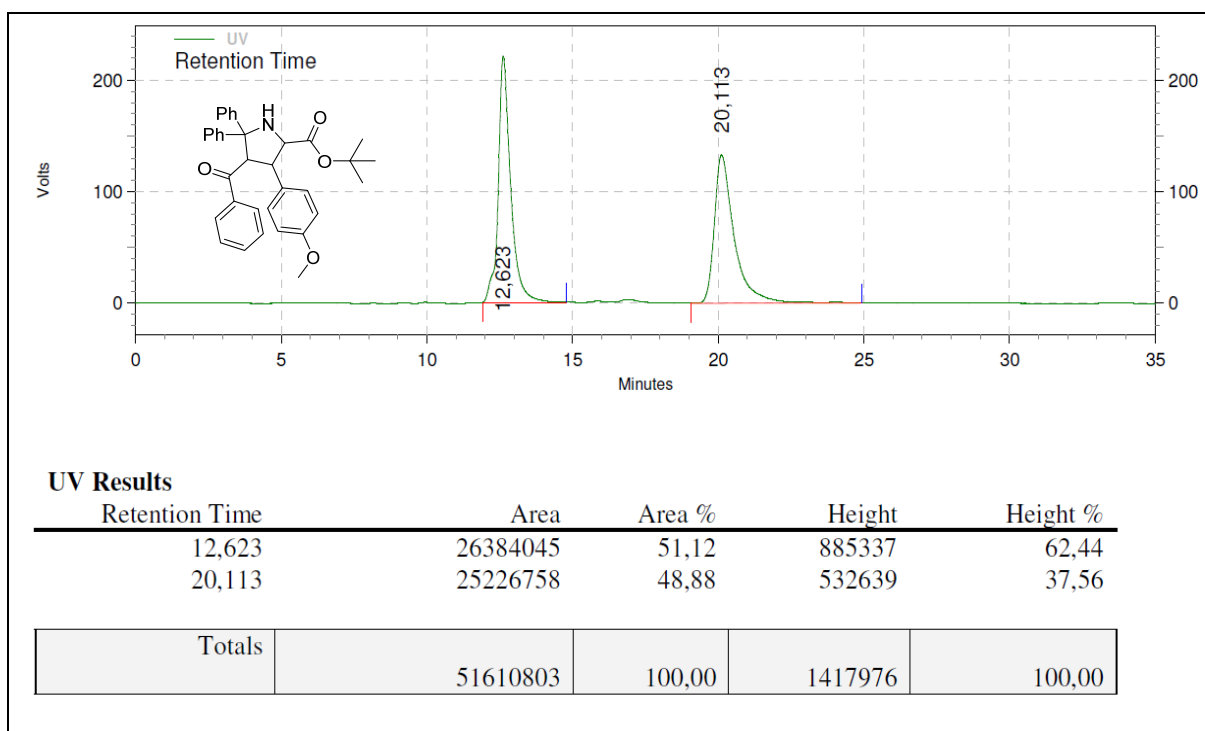

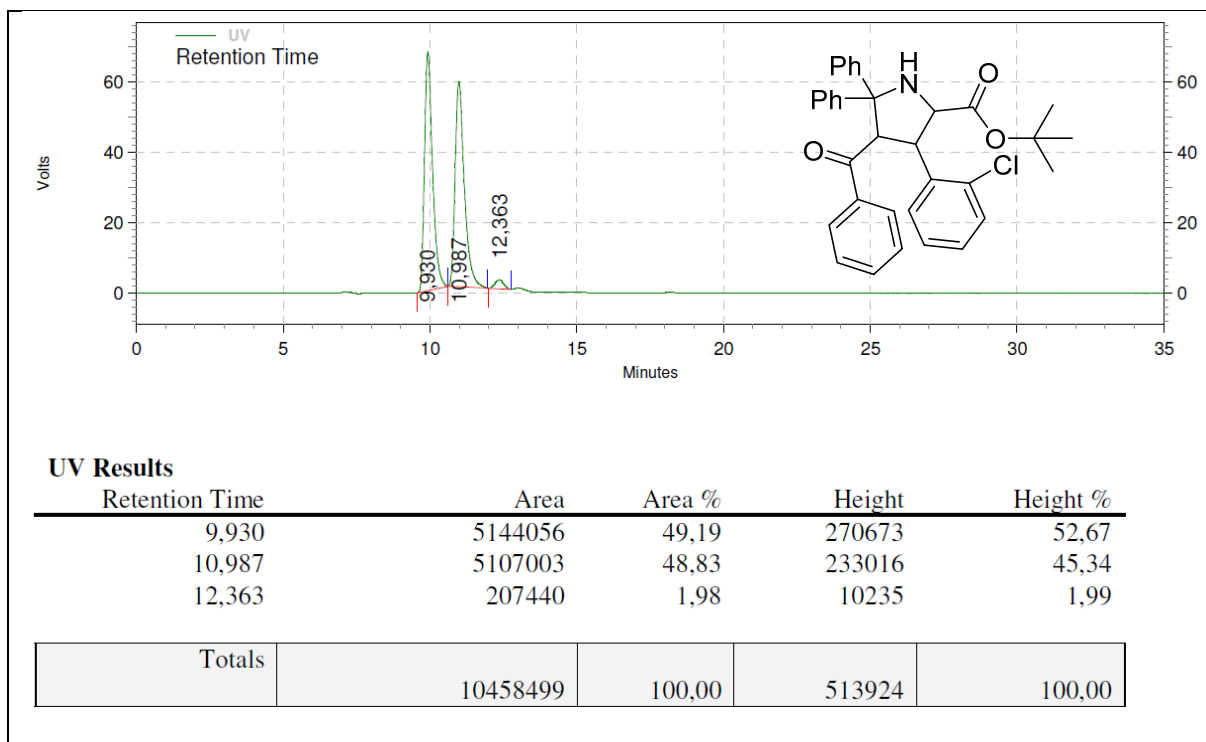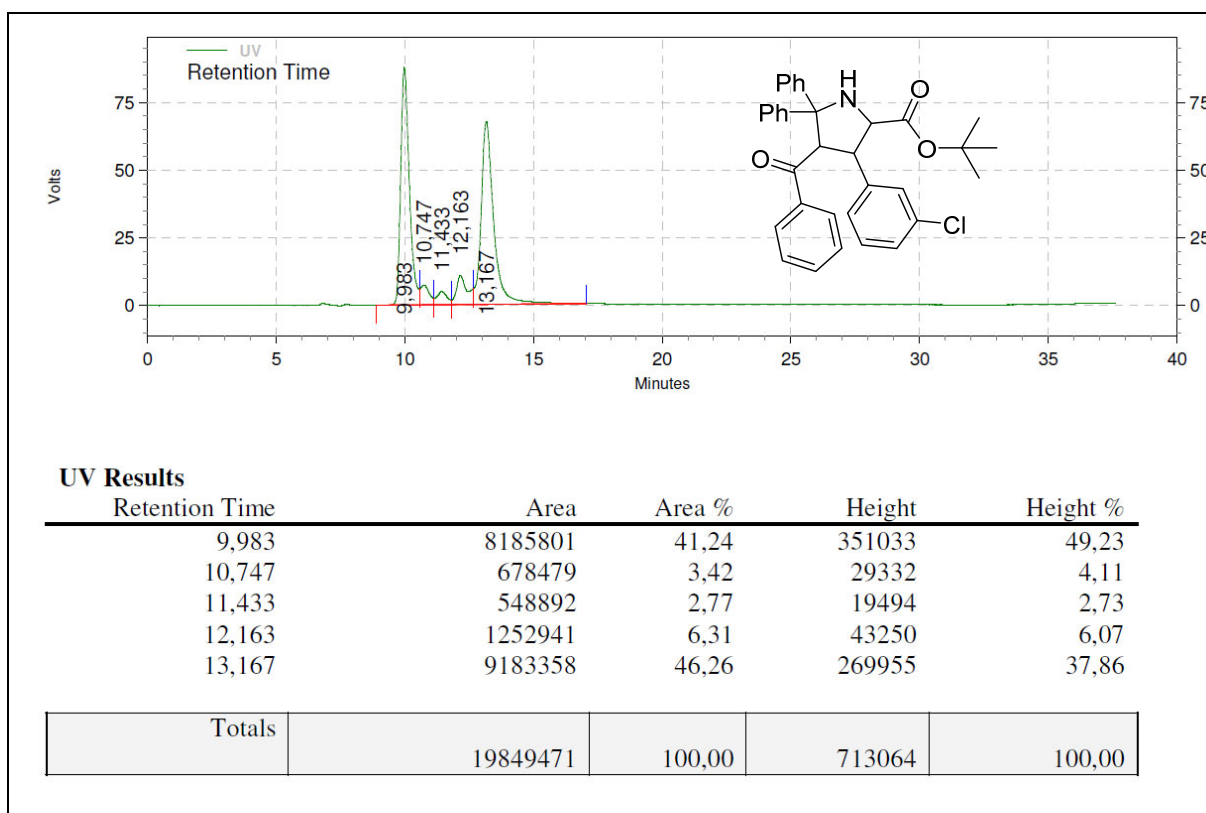

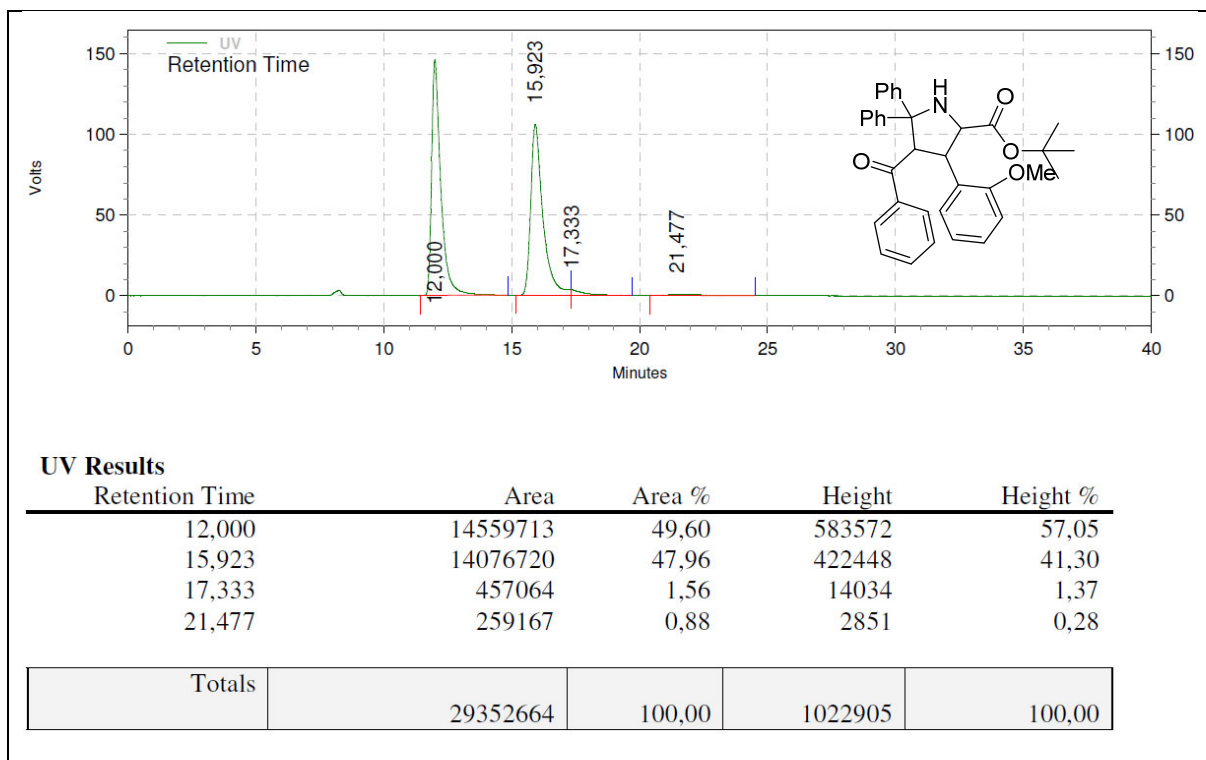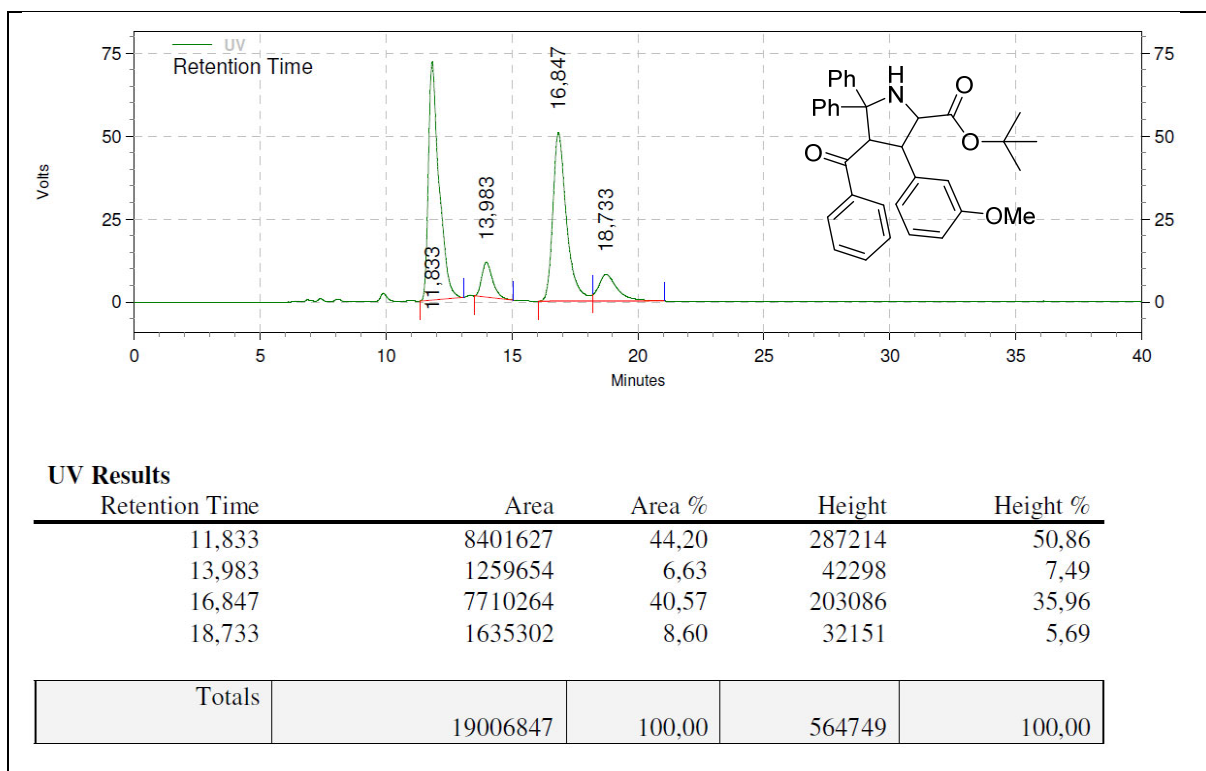

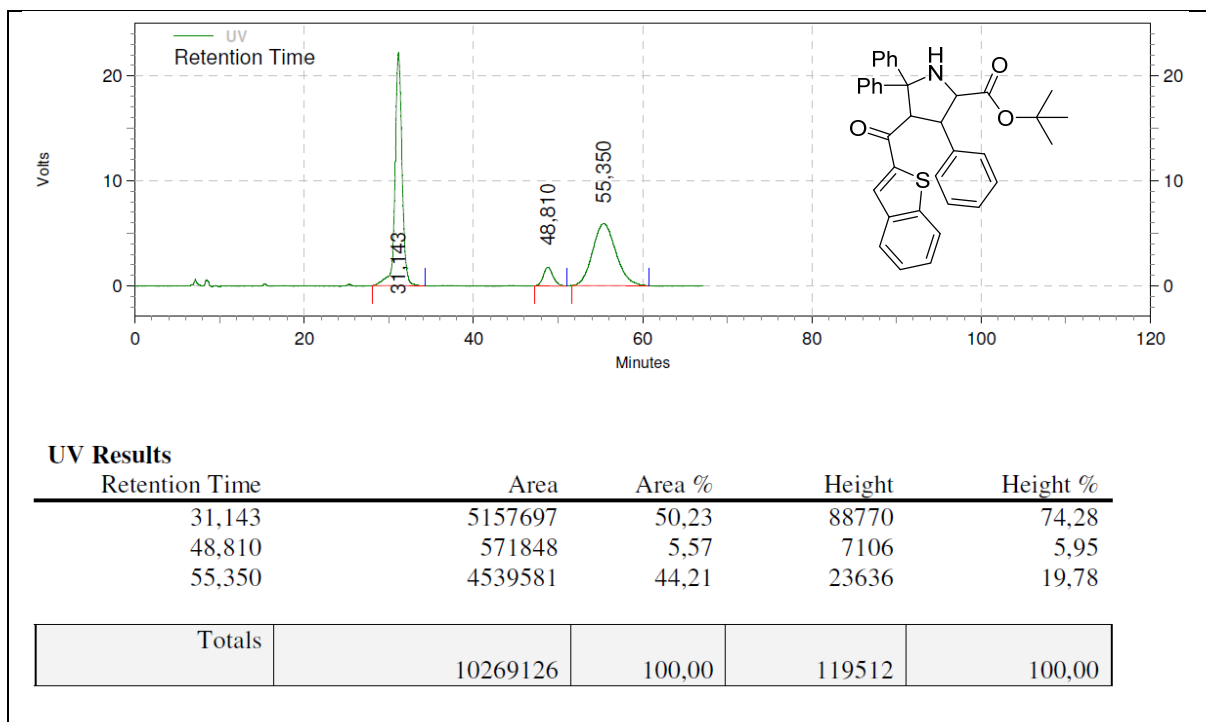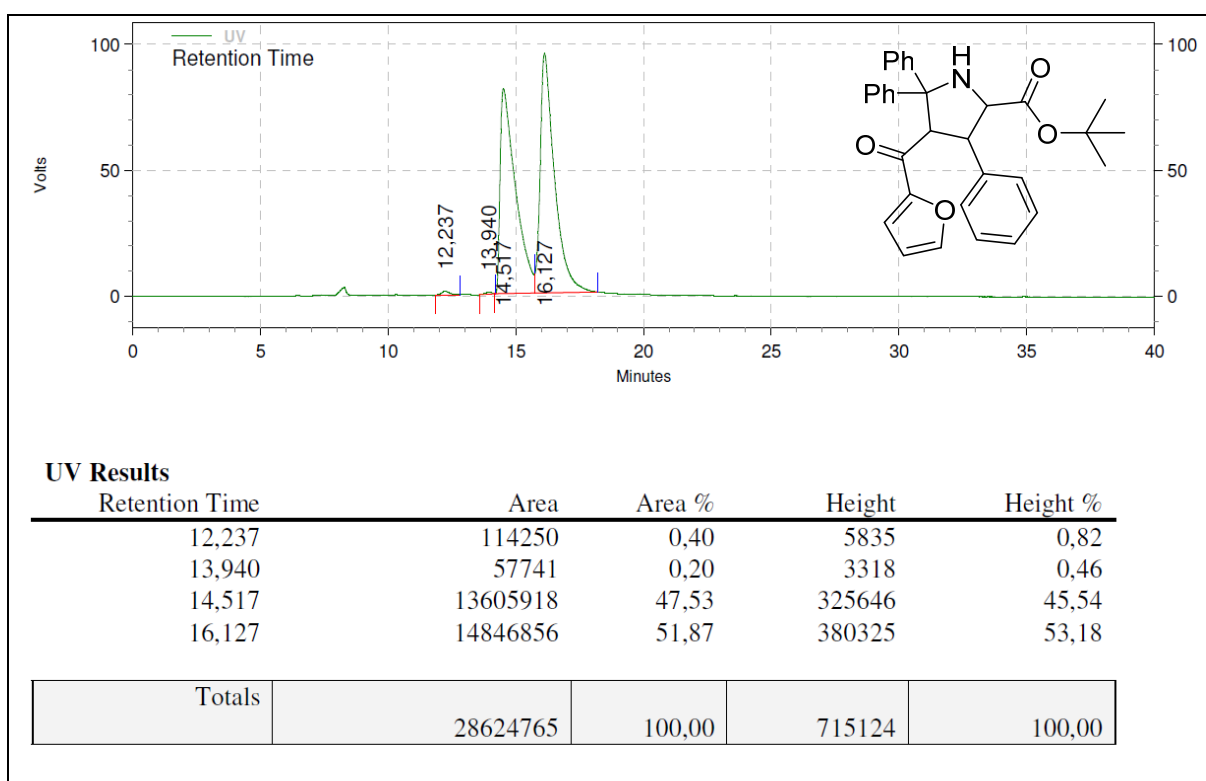

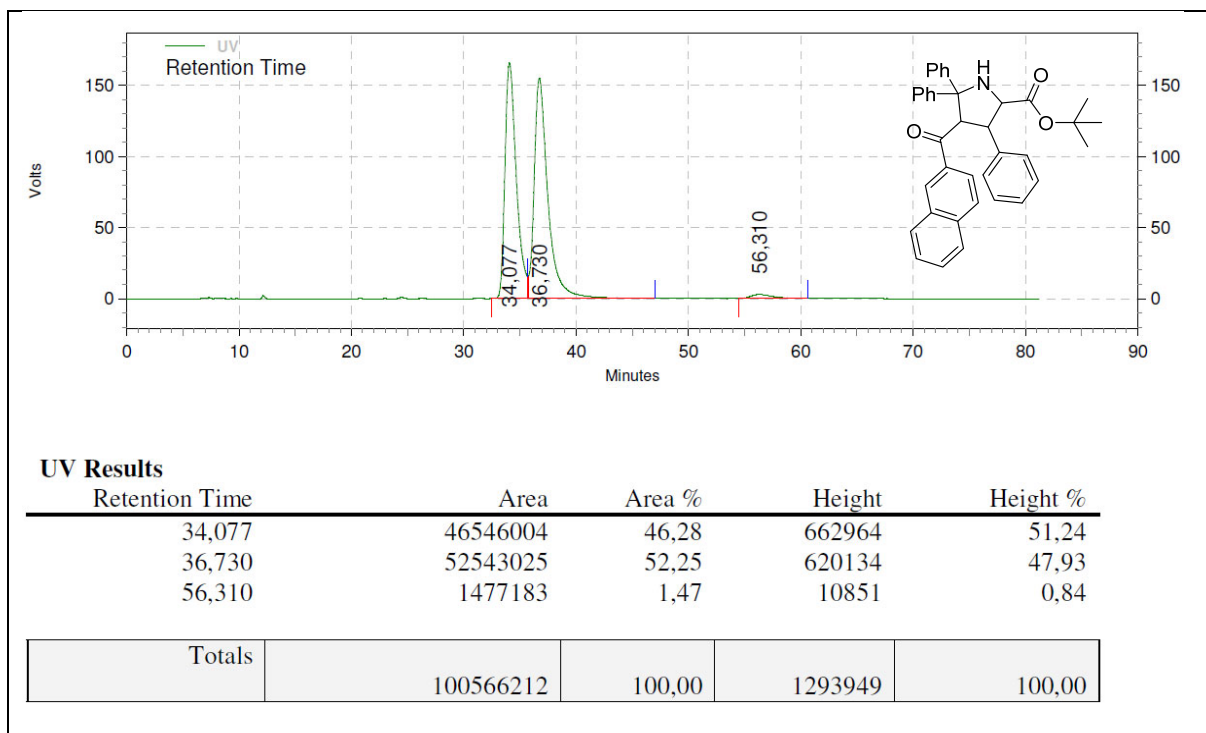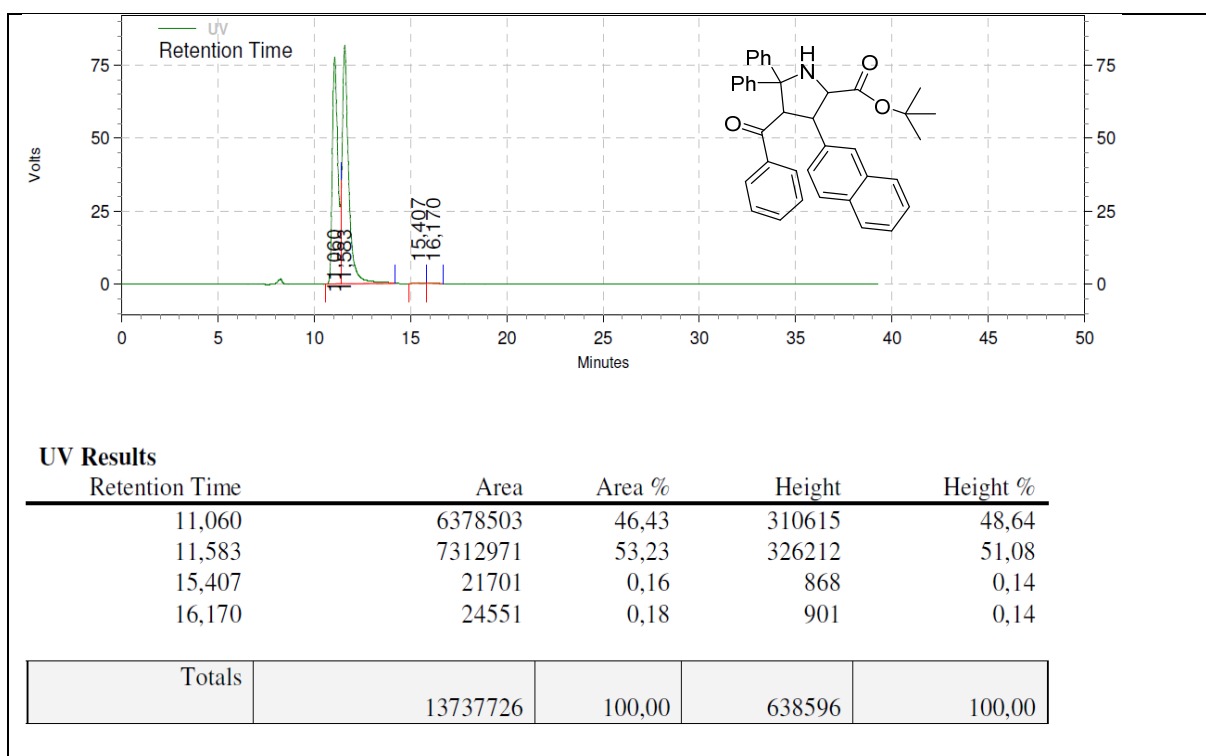

## 5. References

- 
- <sup>1</sup> Agilent (2019). CrysAlis PRO. Agilent Technologies, Yarnton, England.
  - <sup>2</sup> Sheldrick, G. M. *Acta Cryst.*, **2008**, *A64*, 112-122.
  - <sup>3</sup> Thomson, C.J.; Barber, D.M.; Dixon, D. J. *Angew. Chem. Int. Ed.* **2019**, *58*, 2469-2473.
  - <sup>4</sup> Parveen, H.; Iqbar, P.F.; Azam, A. *Synth. Commun.* **2008**, *38*, 3973-3983.
  - <sup>5</sup> Wang, J.; Liu, C.; Yuan, J.; Lei, A. *Angew. Chem. Int. Ed.* **2013**, *52*, 2256–2259.
  - <sup>6</sup> Pierce, B. M.; Simpson, B. F.; Ferguson, K. H.; Wittaker, R. E. *Org. Biomol. Chem.*, **2018**, *16*, 6659.
  - <sup>7</sup> Wang, T.; Chen, G.; Lu, Y.-J.; Chen, Q.; Huo, Y.; Li, X. *Adv. Synth. Catal.* **2019**, *361*, 3886–3892.
  - <sup>8</sup> Jiang, Q.; Jia, J.; Xu, B.; Zhao, A.; Guo, C.-C. *J. Org. Chem.* **2015**, *7*, 3586–3596.
  - <sup>9</sup> Wu, Y.; Zhou, G.; Meng, Q.; Tang, X.; Liu, G.; Yin, H.; Zhao, J.; Yang, J.; Yang, F.; Yo, Z.; Luo, Y. *J. Org. Chem.* **2018**, *21*, 13051–13062.
  - <sup>10</sup> Chiasson, A. I.; Robichaud, S.; Ndongou Moutombi, F. J.; Hebert, M. P. A.; Mbarik, M.; Suvette, M. E.; Touaibia, M. *Molecules* **2020**, *25*, 4686.
  - <sup>11</sup> Liu, S.; Cui, P.; Wang, J.; Zhou, H.; Liu, Q.; Lv, J. *Org. Biomol. Chem.*, **2019**, *17*, 264.
  - <sup>12</sup> Sheshenev, A. E.; Bultukhina, E. V.; White, A. J. P.; Hii, K. K. *Angew. Chem. Int. Ed.* **2013**, *52*, 6988–6991.
  - <sup>13</sup> Hua, M.-Q.; Wang, L.; Cui, H.-F.; Nie, J.; Zhan X.-L.; Ma, J.-A. *Chem. Commun.*, **2011**, *47*, 1631-1633.
  - <sup>14</sup> Wen, S.; Li, X.; Yao, W.; Waheed, A.; Ulah, N.; Lu, Y. *Eur. J. Org. Chem.* **2016**, 4298–4301.
  - <sup>15</sup> Ma, T.; Fu, X.; Wee Kee, C.; Zang, L.; Pan, Y.; Huang, K.-W.; Tan, C.-H. *J. Am. Chem. Soc.* **2011**, *9*, 2828–2831.
